# Supplementary material for: Databases for technical aspects of immunohistochemistry
Source: PubMed Central journal article supplement — J Toxicol Pathol. 2016 Sep 26;30(1):79–107. doi: 10.1293/tox.2016-0047 (PMC5293696; doi:10.1293/tox.2016-0047), 2016-09-26
Supplement: tox-30-079-s001.pdf [file tox-30-079-s001.pdf]

Supplementary Table 1-2 Immunological properties of primary antibodies and IHC staining conditions

| No.   | Antibody               | Primary antibody |                                |           |                      |                 |             |                    |             |                 |               |                   |                     |                                                    |                                        |                 |      |   |
|-------|------------------------|------------------|--------------------------------|-----------|----------------------|-----------------|-------------|--------------------|-------------|-----------------|---------------|-------------------|---------------------|----------------------------------------------------|----------------------------------------|-----------------|------|---|
|       |                        | Fixing solution  | Fixing time                    | Embedding | Dilution             | Incubation time | Temperature | Protease treatment |             |                 |               | Antigen retrieval |                     |                                                    |                                        |                 |      |   |
|       |                        |                  |                                |           |                      |                 |             | Enzyme             | Temperature | Incubation time | Concentration | Method            | Heating             |                                                    | Temperature                            | Incubation time |      |   |
| 1     | ACTH                   | 10%Fo            | -                              | P         | 1/100                | o/n             | 4°C         | -                  | -           | -               | -             | -                 | ND                  | -                                                  | -                                      | -               | -    |   |
| 2     | Actin                  | 10%Fo            | ~1y                            | P         | 1/200                | o/n             | 4°C         | -                  | -           | -               | -             | -                 | MW                  | Citrate BS                                         | 95°C                                   | 30m             | -    |   |
| 3     | Actin, muscle          | 10%Fo            | o/n                            | P         | 1/200                | o/n             | 4°C         | -                  | -           | -               | -             | -                 | MW                  | BS                                                 | -                                      | 10m             | -    |   |
|       |                        | 10%Fo            | 4w                             | P         | 1/100                | 30m             | RT          | -                  | -           | -               | -             | -                 | -                   | -                                                  | -                                      | -               | -    |   |
| 4     | Actin, sarcomeric      | 10%Fo            | 3~5d                           | P         | 1/50                 | o/n             | 4°C         | -                  | -           | -               | -             | -                 | PC                  | Citrate BS                                         | -                                      | 10m             | -    |   |
|       |                        | 10%Fo            | 3~7d                           | P         | 1/100                | 60m             | RT          | -                  | -           | -               | -             | -                 | -                   | -                                                  | -                                      | -               | -    |   |
|       |                        | 10%Fo            | 4w                             | P         | 1/10                 | 2h; o/n         | RT; 4°C     | -                  | -           | -               | -             | -                 | -                   | -                                                  | -                                      | -               | -    |   |
| 5     | Actin, α-smooth muscle | 10%Fo            | ∞                              | P         | Ready to use         | 90m             | RT          | -                  | -           | -               | -             | -                 | Bo                  | PT link (pH9)                                      | 95°C                                   | 20m             | -    |   |
|       |                        | 10%Fo            | o/n                            | P         | Ready to use         | 30m             | RT          | -                  | -           | -               | -             | -                 | MW                  | Citrate BS (pH6)                                   | -                                      | -               | -    |   |
|       |                        | 10%Fo            | 24h                            | P         | Ready to use         | 40m             | 37°C        | -                  | -           | -               | -             | -                 | -                   | -                                                  | -                                      | -               | -    | - |
|       |                        | 10%Fo            | A few days (clinical specimen) | P         | Ready to use         | o/n             | 4°C         | -                  | -           | -               | -             | -                 | -                   | AC                                                 | Target Retrieval Solution ( Dako)      | 121°C           | 20m  | - |
|       |                        | 10%Fo            | ∞                              | P         | Ready to use         | 60m             | RT          | -                  | -           | -               | -             | -                 | -                   | Bo                                                 | BS                                     | -               | 20m  | - |
|       |                        | 10%Fo            | 1y                             | P         | 1/200                | 60m             | RT          | -                  | -           | -               | -             | -                 | -                   | -                                                  | -                                      | -               | -    | - |
|       |                        | 10%Fo            | ∞                              | P         | 1/100                | o/n             | 4°C         | -                  | -           | -               | -             | -                 | -                   | AC                                                 | Citrate BS                             | 121°C           | 5m   | - |
|       |                        | 10%Fo            | 24h                            | P         | 1 µg/mL              | o/n             | 4°C         | -                  | -           | -               | -             | -                 | -                   | MW                                                 | Citrate BS                             | 98°C            | 20m  | - |
|       |                        | 10%Fo            | 1w~                            | P         | 1/1000               | 30m             | RT          | -                  | -           | -               | -             | -                 | -                   | MW                                                 | Citrate BS                             | -               | 10m  | - |
|       |                        | 10%Fo            | 3d                             | P         | 1/1000               | o/n             | 4°C         | -                  | -           | -               | -             | -                 | -                   | -                                                  | -                                      | -               | -    | - |
|       |                        | 10%Fo            | 3~5d                           | P         | 1/100                | 60m             | RT          | -                  | -           | -               | -             | -                 | -                   | PC                                                 | Citrate BS                             | -               | 10m  | - |
|       |                        | 10%Fo            | -                              | P         | 1/100                | o/n             | 4°C         | -                  | -           | -               | -             | -                 | -                   | MW                                                 | Citrate BS                             | -               | 15m  | - |
|       |                        | 10%Fo            | w                              | P         | 1/50                 | o/n             | 4°C         | -                  | -           | -               | -             | -                 | -                   | PC                                                 | Citrate BS                             | 125°C           | 5m   | - |
|       |                        | 10%Fo            | ~1y                            | P         | 1/200                | o/n             | 4°C         | -                  | -           | -               | -             | -                 | -                   | MW                                                 | Citrate BS                             | 95°C            | 30m  | - |
|       |                        | 10%Fo            | 48h                            | P         | 1/1000               | 60m             | RT          | -                  | -           | -               | -             | -                 | -                   | AC                                                 | Target Retrieval Solution ( Dako)      | 121°C           | 3m   | - |
|       |                        | 10%Fo            | 4w                             | P         | 1/100                | o/n             | 4°C         | -                  | -           | -               | -             | -                 | -                   | MW                                                 | Citrate BS                             | 100°C           | 15m  | - |
|       |                        | 10%Fo            | 4w                             | P         | 1/100~500            | 2h; o/n         | RT; 4°C     | -                  | -           | -               | -             | -                 | -                   | -                                                  | -                                      | -               | -    | - |
|       |                        | 10%Fo            | -                              | P         | 1/50                 | 30m             | RT          | -                  | -           | -               | -             | -                 | -                   | ND                                                 | -                                      | -               | -    | - |
|       |                        | 10%Fo            | w                              | P         | 1/100                | 30m             | RT          | -                  | -           | -               | -             | -                 | -                   | MV                                                 | Target Retrieval Solution ( pH9, Dako) | -               | 20m  | - |
|       |                        | 10%Fo            | 24h                            | P; F      | 1/1000               | 60m             | RT          | -                  | -           | -               | -             | -                 | -                   | -                                                  | -                                      | -               | -    | - |
|       |                        | 10%Fo            | ∞                              | P         | 1/200                | 30m             | RT          | -                  | -           | -               | -             | -                 | -                   | -                                                  | -                                      | -               | -    | - |
|       |                        | 10%Fo            | -                              | P         | 1/300                | o/n             | 4°C         | -                  | -           | -               | -             | -                 | -                   | PC                                                 | Target Retrieval Solution ( pH6, Dako) | 125°C           | 0.5m | - |
|       |                        | Not Fo; GA       | 1d~1w                          | P         | 1/1000 ( Cat, 1/500) | 60m             | RT          | -                  | -           | -               | -             | -                 | -                   | -                                                  | -                                      | -               | -    | - |
| 10%Fo | 4w                     | P                | 1/500                          | 60m       | RT                   | -               | -           | -                  | -           | -               | -             | -                 | -                   | -                                                  | -                                      | -               |      |   |
| 10%Fo | w                      | P                | 1/100                          | 30m       | RT                   | -               | -           | -                  | -           | -               | -             | Bo                | Tris BS, EDTA (pH9) | 100°C                                              | 20m                                    | -               |      |   |
| 10%Fo | w                      | P                | 1/100~200                      | o/n       | 4°C                  | -               | -           | -                  | -           | -               | -             | AC                | Citrate BS          | -                                                  | 20m                                    | -               |      |   |
| 10%Fo | ~1y                    | P                | Ready to use                   | 60m       | RT                   | -               | -           | -                  | -           | -               | -             | ND                | -                   | -                                                  | -                                      | -               |      |   |
| 10%Fo | 2d                     | P                | 0.5 µg/mL                      | 60m       | RT                   | -               | -           | -                  | -           | -               | -             | -                 | -                   | -                                                  | -                                      | -               |      |   |
| 10%Fo | -                      | P                | 1/500                          | o/n       | 4°C                  | -               | -           | -                  | -           | -               | -             | MW                | Citrate BS          | -                                                  | 10m                                    | -               |      |   |
| 10%Fo | 3~7d                   | P                | 1/500                          | 60m       | RT                   | -               | -           | -                  | -           | -               | -             | MW                | DW                  | -                                                  | -                                      | -               |      |   |
| 6     | Actin, β               | 10%Fo            | -                              | P         | 1/500                | o/n             | 4°C         | -                  | -           | -               | -             | -                 | ND                  | -                                                  | -                                      | -               | -    |   |
| 7     | Active-β-catenin       | 10%Fo            | ∞                              | P         | 1/50                 | o/n             | 4°C         | -                  | -           | -               | -             | -                 | PC                  | Citrate BS                                         | -                                      | 10m             | -    |   |
| 8     | Adiponectin            | 10%Fo            | 1y                             | P         | 1/50                 | 60m             | RT          | -                  | -           | -               | -             | -                 | Bo                  | BS                                                 | -                                      | 20m             | -    |   |
| 9     | Adipophilin            | 10%Fo            | -                              | P         | 1/50                 | o/n             | 4°C         | -                  | -           | -               | -             | -                 | AC                  | Target Retrieval Solution ( pH6, Dako)             | 121°C                                  | 15m             | -    |   |
|       |                        | 10%Fo            | 1w                             | P         | 1/200                | 60m             | RT          | -                  | -           | -               | -             | -                 | MW                  | Citrate BS                                         | 100°C                                  | 10m             | -    |   |
|       |                        | 10%Fo            | -                              | P         | 1/100                | o/n             | 4°C         | -                  | -           | -               | -             | -                 | MW                  | Target Retrieval Solution ( pH6, Dako), Citrate BS | 100°C                                  | 10m             | -    |   |
|       |                        | 10%Fo            | o/n                            | P         | Ready to use (1/1~2) | 60m             | RT          | -                  | -           | -               | -             | -                 | -                   | -                                                  | -                                      | -               | -    |   |
|       |                        | 10%Fo            | 24h                            | F         | Ready to use         | 60m             | RT          | -                  | -           | -               | -             | -                 | -                   | -                                                  | -                                      | -               | -    |   |
|       |                        | 10%Fo            | 3~5d                           | P         | 1/200                | 60m             | RT          | -                  | -           | -               | -             | -                 | -                   | PC                                                 | Citrate BS                             | -               | 10m  | - |
|       |                        | 10%Fo            | ∞                              | P         | 1/100                | o/n             | 4°C         | -                  | -           | -               | -             | -                 | -                   | AC                                                 | Citrate BS                             | 121°C           | 5m   | - |
|       |                        | 10%Fo            | o/n                            | P         | 1/400                | 60m             | RT          | -                  | -           | -               | -             | -                 | -                   | -                                                  | -                                      | -               | -    |   |
|       |                        | 10%Fo            | o/n                            | P         | 1/1000               | 60m             | 37°C        | -                  | -           | -               | -             | -                 | -                   | PC                                                 | Citrate BS                             | -               | 10m  | - |
| 10%Fo | o/n                    | P                | 1/1000                         | o/n       | 4°C                  | -               | -           | -                  | -           | -               | -             | MW                | Immunosaver         | 98°C                                               | 5~10m                                  | -               |      |   |

Supplementary Table 1-3 Immunological properties of primary antibodies and IHC staining conditions

| No.                    | Antibody                                                                            | Secondary antibody                                              |                                                                                                  |             |                |             | Chromogenic substrate |          | Photo. No. |                 |
|------------------------|-------------------------------------------------------------------------------------|-----------------------------------------------------------------|--------------------------------------------------------------------------------------------------|-------------|----------------|-------------|-----------------------|----------|------------|-----------------|
|                        |                                                                                     | Kit product                                                     | Product                                                                                          | Supplier    | Catalog Number | Temperature | Incubation time       | Reagent  |            | Incubation time |
| 1                      | ACTH                                                                                | Histofine Simple Stain                                          | Histofine® Simple Stain™ Rat MAX PO (MULTI)                                                      | Nichirei    | 414191F        | RT          | 30m                   | DAB      | -          |                 |
| 2                      | Actin                                                                               | LSAB                                                            | Universal LSAB2 Kit/HRP, Rabbit/Mouse                                                            | Dako        | K0675          | RT          | 10m                   | DAB      | ~2m        | Photo. 1        |
| 3                      | Actin, muscle                                                                       | Elite ABC                                                       | VECTASTAIN Elite ABC Kit (Mouse IgG)                                                             | Vector Labs | PK-6102        | RT          | 30m                   | DAB      | 1m         |                 |
|                        |                                                                                     | Histofine Simple Stain                                          | Histofine® Simple Stain™ Rat MAX-PO ( MULTI )                                                    | Nichirei    | 714191         | RT          | 30m                   | DAB      | 1~5m       |                 |
| 4                      | Actin, sarcomeric                                                                   | Histofine Simple Stain                                          | Histofine® Simple Stain™ Rat MAX PO (MULTI)                                                      | Nichirei    | 414191         | RT          | 30m                   | DAB      | 18m        |                 |
|                        |                                                                                     | LSAB                                                            | Polyclonal Rabbit Anti-Mouse Immunoglobulins, Biotinylated affinity-isolated F(ab') <sub>2</sub> | Dako        | E0413          | RT          | 30m                   | DAB      | 5m         | Photo. 2        |
|                        |                                                                                     | Histofine Simple Stain                                          | Histofine® Simple Stain™ Rat MAX-PO ( MULTI )                                                    | Nichirei    | 714191         | RT          | 30m                   | DAB      | 1~5m       |                 |
| 5                      | Actin, α-smooth muscle                                                              | Envision                                                        | EnVision+ System- HRP Labelled Polymer                                                           | Dako        | K1390          | -           | 40m                   | DAB      | 2m30s      |                 |
|                        |                                                                                     | -                                                               | -                                                                                                | -           | -              | -           | -                     | DAB      | -          |                 |
|                        |                                                                                     | Envision                                                        | EnVision™+ Dual Link System-HRP                                                                  | Dako        | K4061          | 37°C        | 30m                   | DAB      | 1~2m       |                 |
|                        |                                                                                     | Envision+                                                       | Envision+ System-HRP Labelled Polymer Anti-mouse                                                 | Dako        | K4001          | RT          | 30m                   | DAB      | 3m         |                 |
|                        |                                                                                     | Histofine Simple Stain                                          | Histofine® Simple Stain™ Rat MAX PO (MULTI)                                                      | Nichirei    | 414191         | RT          | 30m                   | DAB      | 30s        | Photo. 3        |
|                        |                                                                                     | Envision                                                        | EnVision+ System- HRP Labelled Polymer                                                           | Dako        | K1390          | RT          | 1h                    | DAB      | 30s        |                 |
|                        |                                                                                     | Envision                                                        | EnVision+ System- HRP Labelled Polymer                                                           | Dako        | K4000          | 37°C        | 30m                   | DAB      | 2m         |                 |
|                        |                                                                                     | Envision                                                        | EnVision+ System- HRP Labelled Polymer                                                           | Dako        | K4000          | RT          | 30m                   | DAB      | -          |                 |
|                        |                                                                                     | Histofine Simple Stain                                          | Histofine® Simple Stain™ MAX-PO(MULTI)                                                           | Nichirei    | 424151         | RT          | 30m                   | DAB      | 10m        |                 |
|                        |                                                                                     | LSAB                                                            | Universal LSAB2 Kit/HRP, Rabbit/Mouse                                                            | Dako        | K0679          | RT          | 30m                   | DAB      | 1m30s      |                 |
|                        |                                                                                     | Histofine Simple Stain                                          | Histofine® Simple Stain™ Rat MAX PO (MULTI)                                                      | Nichirei    | 414191         | RT          | 30m                   | DAB      | 6m         |                 |
|                        |                                                                                     | Envision                                                        | EnVision+ System- HRP Labelled Polymer                                                           | Dako        | K4000          | RT          | 30m                   | DAB      | -          |                 |
|                        |                                                                                     | Envision                                                        | EnVision™+ Dual Link System-HRP                                                                  | Dako        | K4063          | RT          | 30m                   | DAB      | 3m         |                 |
|                        |                                                                                     | LSAB                                                            | Universal LSAB2 Kit/HRP, Rabbit/Mouse                                                            | Dako        | K0675          | RT          | 10m                   | DAB      | ~2m        |                 |
|                        |                                                                                     | Envision                                                        | EnVision+ System- HRP Labelled Polymer                                                           | Dako        | K4000          | RT          | 30m                   | DAB      | 1m         |                 |
|                        |                                                                                     | Envision                                                        | EnVision™+ Dual Link System-HRP                                                                  | Dako        | K6043          | RT          | 30m                   | DAB      | 2m         |                 |
|                        |                                                                                     | Histofine Simple Stain                                          | Histofine® Simple Stain™ Rat MAX-PO ( MULTI )                                                    | Nichirei    | 714191         | RT          | 30m                   | DAB      | 1-5m       |                 |
|                        |                                                                                     | -                                                               | -                                                                                                | Nichirei    | -              | RT          | 30m                   | DAB      | -          |                 |
|                        |                                                                                     | Histofine Simple Stain                                          | Histofine® Simple Stain™ Rat MAX PO (MULTI)                                                      | Nichirei    | 414191         | RT          | 30m                   | DAB      | 10m        | Photo. 4        |
|                        |                                                                                     | Histofine Simple Stain                                          | Histofine® Simple Stain™ Rat MAX-PO ( M )                                                        | Nichirei    | 714171         | RT          | 30m                   | DAB      | 10m        |                 |
|                        |                                                                                     | Envision                                                        | EnVision+ System- HRP Labelled Polymer                                                           | Dako        | K4000          | RT          | 30m                   | -        | 30s        |                 |
|                        |                                                                                     | Histofine Simple Stain                                          | Histofine® Simple Stain™ MAX-PO(M)                                                               | Nichirei    | 424131         | RT          | 30m                   | DAB      | 90s        |                 |
|                        |                                                                                     | Histofine Simple Stain                                          | Histofine® Simple Stain™ Rat MAX-PO ( MULTI )                                                    | Nichirei    | 714191         | RT          | 30m                   | DAB      | 10m        |                 |
| LSAB                   | Universal LSAB2 Kit/HRP, Rabbit/Mouse                                               | Dako                                                            | K0609                                                                                            | RT          | 10m            | DAB         | 8m                    |          |            |                 |
| Histofine Simple Stain | Histofine® Simple Stain™ Rat MAX PO (MULTI)                                         | Nichirei                                                        | 414191                                                                                           | RT          | 30m            | DAB         | 3m                    |          |            |                 |
| LSAB                   | Universal LSAB2 Kit/HRP, Rabbit/Mouse                                               | Dako                                                            | K0675                                                                                            | RT          | 15m            | DAB         | 5m                    |          |            |                 |
| Histofine Simple Stain | Histofine® MOUSESTAIN KIT*                                                          | Nichirei                                                        | 414321                                                                                           | RT          | 10m            | DAB         | 10m                   | Photo. 5 |            |                 |
| Envision               | EnVision+ System- HRP Labelled Polymer                                              | Dako                                                            | K4000                                                                                            | RT          | 30m            | DAB         | 5m                    | Photo. 6 |            |                 |
| Histofine Simple Stain | Histofine® Simple Stain™ Rat MAX PO (MULTI)                                         | Nichirei                                                        | 414191                                                                                           | RT          | 30m            | DAB         | 1~2m                  | Photo. 7 |            |                 |
| LSAB                   | Polyclonal Swine Anti-Rabbit Immunoglobulins/Biotinylated Swine F(ab') <sub>2</sub> | Dako                                                            | E0431                                                                                            | RT          | 30m            | DAB         | 5m                    |          |            |                 |
| 6                      | Actin, β                                                                            | Histofine Simple Stain                                          | Histofine® Simple Stain™ Rat MAX PO (MULTI)                                                      | Nichirei    | 414191F        | -           | -                     | -        | -          |                 |
| 7                      | Active-β-catenin                                                                    | Histofine Simple Stain                                          | Histofine® Simple Stain™ Rat MAX PO (M)                                                          | Nichirei    | 414171         | RT          | 60m                   | DAB      | -          | Photo. 8        |
| 8                      | Adiponectin                                                                         | Histofine Simple Stain                                          | Histofine® Simple Stain™ Mouse MAX PO (R)                                                        | Nichirei    | 414341         | RT          | 30m                   | DAB      | 30s        | Photo. 9        |
| 9                      | Adipophilin                                                                         | ABC                                                             | VECTASTAIN ABC Kit (Mouse IgG )                                                                  | Vector Labs | PK-4002        | RT          | 30m                   | DAB      | 4~5m       | Photo. 10       |
|                        |                                                                                     | Histofine Simple Stain                                          | Histofine® Simple Stain™ Rat MAX PO (M)                                                          | Nichirei    | 414171         | RT          | 30m                   | DAB      | 10m        | Photo. 11       |
|                        |                                                                                     | Histofine Simple Stain                                          | Histofine® Simple Stain™ Rat MAX PO (MULTI)                                                      | Nichirei    | 414191         | RT          | 1h                    | DAB      | -          |                 |
|                        |                                                                                     | -                                                               | -                                                                                                | -           | -              | -           | -                     | DAB      | -          |                 |
|                        |                                                                                     | Histofine Simple Stain                                          | Histofine® Simple Stain™ Rat MAX-PO ( M )                                                        | Nichirei    | 714171         | RT          | 30m                   | DAB      | 10m        |                 |
|                        |                                                                                     | Histofine Simple Stain                                          | Histofine® Simple Stain™ Rat MAX PO (MULTI)                                                      | Nichirei    | 414191         | RT          | 30m                   | DAB      | 5m         |                 |
|                        |                                                                                     | Biotinylated immunoglobulin                                     | Biotinylated Goat Anti-Guinea Pig IgG Antibody                                                   | Vector Labs | BA-7000        | 37°C        | 30m                   | DAB      | 2m         |                 |
|                        |                                                                                     | Anti-GUINEA PIG IgG (H&L) (GOAT) Antibody Peroxidase Conjugated | Anti-GUINEA PIG IgG (H&L) (GOAT) Antibody Peroxidase Conjugated                                  | Rockland    | 606-103-129    | RT          | 60m                   | DAB      | 3m         |                 |
|                        |                                                                                     | ABC                                                             | VECTASTAIN ABC Kit (Guinea Pig IgG )                                                             | Vector Labs | PK-4007        | RT          | 30m                   | DAB      | 1m         | Photo. 12       |
|                        |                                                                                     | Elite ABC                                                       | Biotinylated Goat Anti-Guinea Pig IgG Antibody                                                   | Vector Labs | BA-7000        | RT          | 30m                   | DAB      | 30s        |                 |



Supplementary Table 2-2 Immunological properties of primary antibodies and IHC staining conditions

| No.    | Antibody                               | Primary antibody |                                |           |                  |                 |             |                    |      |         |              |         |            |                                            |                       |             |                 |
|--------|----------------------------------------|------------------|--------------------------------|-----------|------------------|-----------------|-------------|--------------------|------|---------|--------------|---------|------------|--------------------------------------------|-----------------------|-------------|-----------------|
|        |                                        | Fixing solution  | Fixing time                    | Embedding | Dilution         | Incubation time | Temperature | Antigen retrieval  |      |         |              |         |            |                                            |                       |             |                 |
|        |                                        |                  |                                |           |                  |                 |             | Protease treatment |      |         |              | Heating |            | Method                                     | Solution              | Temperature | Incubation time |
| Enzyme | Temperature                            | Incubation time  | Concentration                  |           |                  |                 |             |                    |      |         |              |         |            |                                            |                       |             |                 |
| 10     | Adrenocorticotropin (ACTH)             | 10%Fo            | 3~5d                           | P         | 1/500            | 60m             | RT          | -                  | -    | -       | -            | -       | -          | -                                          | -                     | -           | -               |
| 11     | Amelogenin                             | -                | 1w                             | P         | 1/5000           | o/n             | 4°C         | Proteinase K       | RT   | 6m      | Ready to use | -       | -          | -                                          | -                     | -           | -               |
| 12     | Amylase                                | 10%Fo; 4%PFA     | 24h                            | P         | 1/100            | 60m             | RT          | -                  | -    | -       | -            | -       | MW         | Citrate BS                                 | -                     | 10m         | -               |
| 13     | Amylase 2A                             | 10%Fo            | o/n                            | P         | 1/200            | 60m             | RT          | -                  | -    | -       | -            | -       | PC         | Citrate BS                                 | -                     | 10m         | -               |
| 14     | Amyloid A                              | 10%Fo            | 1w~                            | P         | 1/200            | 30m             | RT          | Actinase E         | 37°C | 30m     | -            | -       | -          | -                                          | -                     | -           | -               |
|        |                                        | 10%Fo            | 24h                            | P         | 1/500~2000       | -               | -           | -                  | -    | -       | -            | -       | -          | -                                          | Formic Acid (10%)     | RT          | 10~20m          |
| 15     | β-Amyloid                              | 10%Fo            | -                              | P         | 1/500            | o/n             | 4°C         | -                  | -    | -       | -            | -       | -          | -                                          | Formic acid (70%)     | RT          | 30m             |
|        |                                        | 10%Fo            | -                              | P         | 1/200            | o/n             | 4°C         | -                  | -    | -       | -            | -       | -          | -                                          | Formic acid (98~100%) | RT          | 7m              |
|        |                                        | 4%PFA            | 1w                             | P         | 1/200            | 60m             | RT          | Formic acid        | RT   | 5m      | 90%          | -       | -          | -                                          | -                     | -           | -               |
| 16     | Androgen Receptor                      | 10%Fo            | -                              | P         | 1/100            | o/n             | 4°C         | -                  | -    | -       | -            | -       | MW         | Citrate BS                                 | 98°C                  | 15m         | -               |
|        |                                        | 10%Fo            | ∞                              | P         | 1/50             | 30m             | RT          | -                  | -    | -       | -            | -       | -          | AC                                         | BS(pH6)               | 121°C       | 15m             |
| 17     | Angiotensin II type 1 Receptor         | 10%Fo            | -                              | P         | 1/300            | o/n             | 4°C         | Proteinase K       | RT   | 5m      | Ready to use | -       | -          | -                                          | -                     | -           | -               |
| 18     | Aquaporin 1                            | 10%Fo; 4%PFA     | ∞                              | P         | 1/200            | 60m             | RT          | -                  | -    | -       | -            | -       | BO         | Citrate BS                                 | 95°C                  | 40m         | -               |
|        |                                        | 10%Fo            | 7d                             | P         | 1/5000           | o/n             | 4°C         | -                  | -    | -       | -            | -       | AC         | Target Retrieval Solution ( pH6, Dako)     | 105°C                 | 15m         | -               |
| 19     | Aquaporin 2                            | 10%Fo            | 7d                             | P         | 1/5000           | o/n             | 4°C         | -                  | -    | -       | -            | -       | -          | -                                          | -                     | -           | -               |
| 20     | Bcl-2                                  | 10%Fo            | -                              | P         | 1/100            | o/n             | 4°C         | -                  | -    | -       | -            | -       | MW         | Citrate BS                                 | -                     | 15m         | -               |
|        |                                        | 10%Fo            | 3~7d                           | P         | 1/40             | o/n             | 4°C         | -                  | -    | -       | -            | -       | -          | -                                          | -                     | -           | -               |
| 21     | Bcl-6                                  | 10%Fo            | -                              | P         | 1/1000           | o/n             | 4°C         | -                  | -    | -       | -            | -       | AC         | Citrate BS                                 | 121°C                 | 15m         | -               |
|        |                                        | 10%Fo            | -                              | P         | 1/50             | 30m             | RT          | -                  | -    | -       | -            | -       | PC         | Target Retrieval Solution ( pH6, Dako)     | 125°C                 | 0.5m        | -               |
|        |                                        | 10%Fo            | -                              | P         | 1/1000           | o/n             | 4°C         | -                  | -    | -       | -            | -       | PC         | Target Retrieval Solution ( pH6, Dako)     | 125°C                 | 0.5m        | -               |
| 22     | BrdU                                   | 10%Fo            | 2w                             | P         | 1/40             | 60m             | RT          | -                  | -    | -       | -            | -       | -          | -                                          | -                     | -           | -               |
|        |                                        | 10%Fo            | 3~7d                           | P         | 1/50000 ( Ovary, | 60m             | RT          | -                  | -    | -       | -            | -       | MW         | Citrate BS                                 | -                     | -           | -               |
|        |                                        | 10%Fo            | o/n                            | P         | 1/1000           | o/n             | 4°C         | Proteinase K       | RT   | 15m     | 0.4 mg/mL    | -       | -          | -                                          | -                     | -           | -               |
|        |                                        | 10%Fo            | -                              | P         | 1/1000           | o/n             | 4°C         | Proteinase K       | RT   | 5m; 10m | -            | -       | -          | -                                          | HCl (4N)              | RT          | 30m             |
|        |                                        | 10%Fo            | -                              | P         | 1/100            | o/n             | 4°C         | Proteinase         | RT   | 5~10m   | 0.0005       | -       | -          | -                                          | -                     | -           | -               |
|        |                                        | 10%Fo            | o/n                            | P         | 1/30             | 10m             | RT          | -                  | -    | -       | -            | -       | PC         | Citrate BS                                 | -                     | 10m         | -               |
|        |                                        | 10%Fo            | ∞                              | P         | 1/100            | 30m             | RT          | Proteinase K       | RT   | 10m     | 0.4 mg/mL    | -       | -          | -                                          | -                     | -           | -               |
|        |                                        | 4%PFA            | 24h                            | P         | 1/250            | 60m             | RT          | Actinase           | 37°C | 3m      | 0.02%        | MW      | Citrate BS | 98°C                                       | 15m                   | -           |                 |
|        |                                        | 10%Fo            | 24h                            | P         | 1/200            | 2h              | RT          | Actinase           | 37°C | 3m      | 0.02%        | MW      | Citrate BS | 98°C                                       | 15m                   | -           |                 |
|        |                                        | 10%Fo            | ∞                              | P         | 1/100            | 60m             | RT          | -                  | -    | -       | -            | -       | PC         | Citrate BS                                 | 125°C; 90°C           | 30s; 5s     | -               |
| 23     | Breast Cancer Resistance Protein/CD338 | 10%Fo            | 3~7d                           | P         | 1/1000           | 60m             | RT          | -                  | -    | -       | -            | -       | AC         | Citrate BS                                 | 121°C                 | 20m         | -               |
|        |                                        | 10%Fo            | 3~7d                           | P         | 1/1000           | 60m             | RT          | -                  | -    | -       | -            | -       | AC         | Citrate BS                                 | 121°C                 | 20m         | -               |
| 24     | Calbindin D28K                         | 10%Fo            | 1w                             | P         | 1/200            | 60m             | RT          | -                  | -    | -       | -            | -       | He         | CC2 (Roche)                                | 98°C                  | 30m         | -               |
|        |                                        | 4%ZnFo           | 2d                             | P         | 1/3000           | o/n             | 4°C         | -                  | -    | -       | -            | -       | MW         | Citrate BS                                 | 100°C                 | 15m         | -               |
|        |                                        | 10%Fo            | w                              | P         | 1/500            | o/n             | 4°C         | -                  | -    | -       | -            | -       | Bo         | Citrate BS                                 | 100°C                 | 40m         | -               |
|        |                                        | 10%Fo            | 7d                             | P         | 1/5000           | o/n             | 4°C         | -                  | -    | -       | -            | -       | AC         | Target Retrieval Solution ( pH6, Dako)     | 105°C                 | 15m         | -               |
| 25     | Calcitonin                             | -                | -                              | P         | 1/400            | 60m             | RT          | -                  | -    | -       | -            | -       | He         | CC2 (Roche)                                | 98°C                  | 30m         | -               |
|        |                                        | 10%Fo            | 24h                            | P         | Ready to use     | 40m             | 37°C        | -                  | -    | -       | -            | -       | MW         | -                                          | 120°C                 | 14m         | -               |
|        |                                        | 10%Fo            | o/n                            | P         | 1/2              | 20m             | RT          | -                  | -    | -       | -            | -       | ND         | -                                          | -                     | -           |                 |
|        |                                        | 10%Fo            | -                              | P         | 1/100            | o/n             | 4°C         | -                  | -    | -       | -            | -       | AC         | Target Retrieval Solution ( pH6, Dako)     | 105°C                 | 5m          | -               |
|        |                                        | 10%Fo            | 1y                             | P         | Ready to use     | 60m             | RT          | -                  | -    | -       | -            | -       | Bo         | BS                                         | -                     | 20m         | -               |
| 26     | Calponin                               | 10%Fo            | A few days (clinical specimen) | P         | 1/1000           | o/n             | 4°C         | -                  | -    | -       | -            | -       | AC         | Target Retrieval Solution ( Dako)          | 121°C                 | 20m         | -               |
| 27     | Calretinin                             | 10%Fo; Bouin     | o/n                            | P         | 1/300            | 3h              | RT          | -                  | -    | -       | -            | -       | MW         | Immunosaver (0.5%)                         | 100°C                 | 15m         | -               |
|        |                                        | 10%Fo            | 24h                            | P         | 1/50~100         | 30m             | RT          | -                  | -    | -       | -            | -       | MW         | Tris BS                                    | 120°C                 | 14m         | -               |
|        |                                        | 10%Fo            | 1y                             | P         | 1/50             | 60m             | RT          | -                  | -    | -       | -            | -       | Bo         | BS                                         | -                     | 10m         | -               |
| 28     | <i>Candida albicans</i>                | 10%Fo            | 1w~                            | P         | 1/50             | 30m             | 37°C        | Trypsin            | 37°C | 30m     | -            | -       | -          | -                                          | -                     | -           |                 |
| 29     | Caspase-3                              | 10%Fo            | -                              | P         | 1/200            | o/n             | 4°C         | -                  | -    | -       | -            | -       | MW         | HistoVT One                                | -                     | 15m         | -               |
|        |                                        | MD               | 2~4h                           | P         | 1/250            | 60m             | RT          | -                  | -    | -       | -            | -       | MW         | Immunosaver                                | -                     | 3m          | -               |
| 30     | Catalase                               | 10%Fo            | 3~5d                           | P         | 1/200            | 60m             | RT          | -                  | -    | -       | -            | -       | PC         | Citrate BS                                 | -                     | 10m         | -               |
|        |                                        | 10%Fo            | 3~5d                           | P         | 1/200            | 60m             | RT          | -                  | -    | -       | -            | -       | PC         | Citrate BS                                 | -                     | 10m         | -               |
| 31     | β-catenin                              | 10%Fo            | 24h                            | P         | 1/1000           | o/n             | 4°C         | -                  | -    | -       | -            | -       | AC         | Instant antigen retrieval H buffer ( pH7 ) | 121°C                 | 20m         | -               |
|        |                                        | 10%Fo            | w                              | P         | 1/1000           | o/n             | 4°C         | -                  | -    | -       | -            | -       | PC         | Citrate BS                                 | 125°C                 | 5m          | -               |

Supplementary Table 2-3 Immunological properties of primary antibodies and IHC staining conditions

| No. | Antibody                               | Secondary antibody          |                                                                                                  |             |                |             |                 | Chromogenic substrate |                 | Photo. No. |
|-----|----------------------------------------|-----------------------------|--------------------------------------------------------------------------------------------------|-------------|----------------|-------------|-----------------|-----------------------|-----------------|------------|
|     |                                        | Kit product                 | Product                                                                                          | Supplier    | Catalog Number | Temperature | Incubation time | Reagent               | Incubation time |            |
| 10  | Adrenocorticotropin (ACTH)             | Histofine Simple Stain      | Histofine® Simple Stain™ Rat MAX PO (MULTI)                                                      | Nichirei    | 414191         | RT          | 30m             | DAB                   | 4m              |            |
| 11  | Amelogenin                             | Envision                    | EnVision™+ Dual Link System-HRP                                                                  | Dako        | K4063          | RT          | 30m             | DAB                   | 1m              |            |
| 12  | Amylase                                | Histofine Simple Stain      | Histofine® Simple Stain™ Rat MAX PO (G)                                                          | Nichirei    | 414331         | RT          | 30m             | DAB                   | -               | Photo. 13  |
| 13  | Amylase 2A                             | Elite ABC                   | VECTASTAIN Elite ABC Kit (Rabbit IgG)                                                            | Vector Labs | PK-6101        | RT          | 30m             | DAB                   | 30s             | Photo. 14  |
| 14  | Amyloid A                              | Histofine Simple Stain      | Histofine® Simple Stain™ MAX-PO(MULTI)                                                           | Nichirei    | 424151         | RT          | 30m             | DAB                   | 10m             | Photo. 15  |
|     |                                        | Envision                    | EnVision™+ Dual Link System-HRP                                                                  | Dako        | K4061          | 37°C        | 30m             | DAB                   | 1~2m            |            |
| 15  | β-Amyloid                              | Histofine Simple Stain      | Histofine® MOUSESTAIN KIT*                                                                       | Nichirei    | 414321         | RT          | 10m             | DAB                   | 10m             |            |
|     |                                        | Biotinylated immunoglobulin | Mouse on Mouse (M.O.M.™) Basic Kit                                                               | Vector Labs | BMK-2202       | RT          | 15m             | DAB                   | -               | Photo. 16  |
|     |                                        | Peroxidase streptavidin     | Histofine® SAB-PO(M)                                                                             | Nichirei    | 426062         | RT          | 5m              | DAB                   | 30s             | Photo. 17  |
| 16  | Androgen Receptor                      | Elite ABC                   | VECTASTAIN Elite ABC Kit (Rabbit IgG)                                                            | Vector Labs | PK-6101        | RT          | 30m             | DAB                   | 10m             | Photo. 18  |
|     |                                        | LSAB                        | Universal LSAB2 Kit/HRP, Rabbit/Mouse                                                            | Dako        | K0609          | RT          | 10m             | DAB                   | 5m              | Photo. 19  |
| 17  | Angiotensin II type 1 Receptor         | Histofine Simple Stain      | Histofine® Simple Stain™ Rat MAX PO (R)                                                          | Nichirei    | 414181         | RT          | 30m             | DAB                   | 90s             |            |
| 18  | Aquaporin 1                            | Envision                    | EnVision™+ Dual Link System-HRP                                                                  | Dako        | K4063          | RT          | 60m             | DAB                   | 2m              | Photo. 20  |
|     |                                        | Envision                    | EnVision+ System- HRP Labelled Polymer Anti-Rabbit                                               | Dako        | K4002          | RT          | 30m             | DAB                   | 2~5m            | Photo. 21  |
| 19  | Aquaporin 2                            | Envision                    | EnVision+ System- HRP Labelled Polymer Anti-Rabbit                                               | Dako        | K4002          | RT          | 30m             | DAB                   | 2~5m            | Photo. 22  |
| 20  | Bcl-2                                  | SAB                         | Histofine® SimpleStain SAB-PO (MULTI)                                                            | Nichirei    | 424043         | -           | -               | -                     | -               |            |
|     |                                        | LSAB                        | Polyclonal Swine Anti-Rabbit Immunoglobulins/Biotinylated Swine F(ab') <sub>2</sub>              | Dako        | E0431          | RT          | 30m             | DAB                   | 5m              |            |
| 21  | Bcl-6                                  | Envision                    | EnVision+ System- HRP Labelled Polymer Anti-Rabbit                                               | Dako        | K4002          | RT          | 30m             | DAB                   | -               |            |
|     |                                        | Histofine Simple Stain      | Histofine® Simple Stain™ Mouse MAX PO (R)                                                        | Nichirei    | 414341         | RT          | 30m             | DAB                   | 4m              |            |
|     |                                        | Histofine Simple Stain      | Histofine® Simple Stain™ Mouse MAX PO (R)                                                        | Nichirei    | 414341         | RT          | 30m             | DAB                   | 4m              |            |
| 22  | BrdU                                   | Histofine Simple Stain      | Histofine® Simple Stain™ Mouse MAX PO (Rat)                                                      | Nichirei    | 414311         | RT          | 30m             | DAB                   | 30s             |            |
|     |                                        | Histofine Simple Stain      | Histofine® Simple Stain™ Rat MAX PO (MULTI)                                                      | Nichirei    | 414191         | RT          | 30m             | DAB                   | 5m              | Photo. 23  |
|     |                                        | Envision                    | EnVision+ System- HRP Labelled Polymer                                                           | Dako        | K4000          | 37°C        | 30m             | DAB                   | 2m              | Photo. 24  |
|     |                                        | Envision                    | EnVision+ System- HRP Labelled Polymer                                                           | Dako        | K4000          | RT          | 30m             | DAB                   | -               |            |
|     |                                        | Histofine Simple Stain      | Histofine® Simple Stain™ Rat MAX-PO ( G )                                                        | Nichirei    | 714331         | RT          | 30m             | DAB                   | 1~5m            |            |
|     |                                        | Elite ABC                   | VECTASTAIN Elite ABC Kit (Mouse IgG)                                                             | Vector Labs | PK-6102        | RT          | 30m             | DAB                   | -               |            |
|     |                                        | Envision                    | EnVision™+ Dual Link System-HRP                                                                  | Dako        | K4063          | RT          | 30m             | -                     | 2m              |            |
|     |                                        | Elite ABC                   | VECTASTAIN Elite ABC Kit (Mouse IgG)                                                             | Vector Labs | PK-6102        | RT          | 30m             | DAB                   | 5m              |            |
|     |                                        | LSAB                        | Polyclonal Rabbit Anti-Mouse Immunoglobulins, Biotinylated affinity-isolated F(ab') <sub>2</sub> | Dako        | E0413          | RT          | 30m             | DAB                   | 8m              |            |
|     |                                        | Histofine SAB-PO(M)         | Histofine® SAB-PO ( M )                                                                          | Nichirei    | 424022         | RT          | 10m             | DAB                   | 20m             |            |
| 23  | Breast Cancer Resistance Protein/CD338 | LSAB                        | -                                                                                                | Dako        | -              | RT          | 30m             | DAB                   | 5m              |            |
|     |                                        | Histofine Simple Stain      | Histofine® Simple Stain™ Rat MAX PO (MULTI)                                                      | Nichirei    | 414191         | RT          | 30m             | DAB                   | 5m              |            |
| 24  | Calbindin D28K                         | Histofine Simple Stain      | Histofine® Simple Stain™ Rat MAX PO (MULTI)                                                      | Nichirei    | 414191         | 37°C        | 30m             | DAB                   | 8m              | Photo. 25  |
|     |                                        | Envision                    | EnVision™+ Dual Link System-HRP                                                                  | Dako        | K6043          | RT          | 30m             | DAB                   | 3m              | Photo. 26  |
|     |                                        | Envision                    | EnVision+ System- HRP Labelled Polymer                                                           | Dako        | K139111        | RT          | 30m             | DAB                   | 10m             | Photo. 27  |
|     |                                        | Envision                    | EnVision+ System- HRP Labelled Polymer Anti-Rabbit                                               | Dako        | K4002          | RT          | 30m             | DAB                   | 2~5m            |            |
| 25  | Calcitonin                             | Histofine Simple Stain      | Histofine® Simple Stain™ Rat MAX PO (MULTI)                                                      | Nichirei    | 414191         | RT          | 30m             | DAB                   | 8m              |            |
|     |                                        | Envision                    | EnVision™+ Dual Link System-HRP                                                                  | Dako        | K4061          | 37°C        | 30m             | DAB                   | 1~2m            |            |
|     |                                        | Elite ABC                   | VECTASTAIN Elite ABC Kit (Rabbit IgG)                                                            | Vector Labs | PK-6101        | RT          | 30m             | DAB                   | 30s             |            |
|     |                                        | Histofine Simple Stain      | Histofine® Simple Stain™ Rat MAX PO (R)                                                          | Nichirei    | 414181         | RT          | 30m             | DAB                   | -               | Photo. 28  |
|     |                                        | Histofine Simple Stain      | Histofine® Simple Stain™ Rat MAX PO (MULTI)                                                      | Nichirei    | 414191         | RT          | 30m             | DAB                   | 30s             |            |
| 26  | Calponin                               | Envision+                   | Envision+ System-HRP Labelled Polymer Anti-mouse                                                 | Dako        | K4001          | RT          | 30m             | DAB                   | 3m              | Photo. 29  |
| 27  | Calretinin                             | Envision                    | EnVision+ System- HRP Labelled Polymer                                                           | Dako        | K4000          | RT          | 60m             | DAB                   | 2m              | Photo. 30  |
|     |                                        | Envision                    | EnVision™+ Dual Link System-HRP                                                                  | Dako        | K4061          | 37°C        | 30m             | DAB                   | 1~2m            |            |
|     |                                        | Histofine Simple Stain      | Histofine® Simple Stain™ Rat MAX PO (MULTI)                                                      | Nichirei    | 414191         | RT          | 30m             | DAB                   | 30s             | Photo. 31  |
| 28  | <i>Candida albicans</i>                | -                           | -                                                                                                | -           | -              | -           | -               | FITC                  | -               | Photo. 32  |
| 29  | Caspase-3                              | Histofine Simple Stain      | Histofine® Simple Stain™ Rat MAX PO (MULTI)                                                      | Nichirei    | 414191F        | -           | -               | -                     | -               |            |
|     |                                        | Histofine Simple Stain      | Histofine® Simple Stain™ Rat MAX-PO ( MULTI ) ;                                                  | Nichirei    | 714191; 714341 | RT          | 30m             | DAB                   | 10m             | Photo. 33  |
| 30  | Catalase                               | Histofine Simple Stain      | Histofine® Simple Stain™ Rat MAX PO (MULTI)                                                      | Nichirei    | 414191         | RT          | 30m             | DAB                   | 2~5m            |            |
|     |                                        | Histofine Simple Stain      | Histofine® Simple Stain™ Rat MAX PO (MULTI)                                                      | Nichirei    | 414191         | RT          | 30m             | DAB                   | 6m              |            |
| 31  | β-catenin                              | Envision                    | EnVision™+ Dual Link System-HRP                                                                  | Dako        | K4063          | RT          | 30m             | DAB                   | 1m30s           |            |
|     |                                        | Envision                    | EnVision™+ Dual Link System-HRP                                                                  | Dako        | K4063          | RT          | 30m             | DAB                   | 3m              |            |



Supplementary Table 3-2 Immunological properties of primary antibodies and IHC staining conditions

| No.                                       | Antibody                       | Primary antibody                          |             |                |                      |                 |             |                    |             |                 |               |                   |                                        |                                        |                                         |                |     |
|-------------------------------------------|--------------------------------|-------------------------------------------|-------------|----------------|----------------------|-----------------|-------------|--------------------|-------------|-----------------|---------------|-------------------|----------------------------------------|----------------------------------------|-----------------------------------------|----------------|-----|
|                                           |                                | Fixing solution                           | Fixing time | Embedding      | Dilution             | Incubation time | Temperature | Protease treatment |             |                 |               | Antigen retrieval |                                        |                                        |                                         |                |     |
|                                           |                                |                                           |             |                |                      |                 |             | Enzyme             | Temperature | Incubation time | Concentration | Method            | Solution                               | Temperature                            | Incubation time                         |                |     |
| 32                                        | CC10                           | 10%Fo                                     | -           | P              | 1/5000               | o/n             | 4°C         | -                  | -           | -               | -             | -                 | AC                                     | Target Retrieval Solution ( pH7, Dako) | 121°C                                   | 20m            |     |
| 33                                        | CD3                            | 10%Fo                                     | 4w          | P              | 1/20                 | 60m             | RT          | -                  | -           | -               | -             | -                 | AC                                     | EDTA                                   | 121°C                                   | 15m            |     |
|                                           |                                | 4%PFA                                     | 24h         | AMeX-P         | 2.5 µg/mL            | o/n             | 4°C         | -                  | -           | -               | -             | -                 | MW                                     | Citrate BS                             | 98°C                                    | 10m            |     |
|                                           |                                | PLP                                       | 6h          | AMeX-P         | 2.5 µg/mL            | o/n             | 4°C         | -                  | -           | -               | -             | -                 | MW                                     | Citrate BS                             | 98°C                                    | 10m            |     |
|                                           |                                | 10%Fo                                     | w           | P              | 1/25-50              | o/n             | 4°C         | -                  | -           | -               | -             | -                 | AC                                     | Citrate BS                             | -                                       | 20m            |     |
|                                           |                                | 10%Fo                                     | 24h         | P              | 1/500                | 60m             | RT          | -                  | -           | -               | -             | -                 | MW                                     | EDTA                                   | 95°C                                    | 20m            |     |
|                                           |                                | 10%Fo                                     | >1w         | P              | 1/100                | o/n             | 4°C         | -                  | -           | -               | -             | -                 | MW                                     | Citrate BS                             | 95°C                                    | 15m            |     |
|                                           |                                | 10%Fo                                     | 48h         | P              | 1/50                 | o/n             | 4°C         | -                  | -           | -               | -             | -                 | AC                                     | Target Retrieval Solution ( Dako)      | 121°C                                   | 3m             |     |
|                                           |                                | Unfixed (acetone after slice preparation) | 10m         | F              | 1/50                 | o/n             | 4°C         | -                  | -           | -               | -             | -                 | -                                      | -                                      | -                                       | -              | -   |
|                                           |                                | 10%Fo                                     | ∞           | P              | 1/200                | 60m             | RT          | Proteinase K       | RT          | 10m             | 0.4 mg/mL     | -                 | -                                      | -                                      | -                                       | -              | -   |
|                                           |                                | 10%Fo; MD; PLP                            | 1d~1w       | P; F           | 1/100                | 60m             | RT          | -                  | -           | -               | -             | -                 | -                                      | MW                                     | Immunosaver, Tris-HCl (pH9)             | -              | 3m  |
|                                           |                                | 10%Fo                                     | o/n         | P              | Ready to use (1/1-2) | o/n             | 4°C         | -                  | -           | -               | -             | -                 | -                                      | AC                                     | Nichrei antigen retrieval buffer (pH 9) | 120°C          | 20m |
|                                           |                                | 10%Fo                                     | ∞           | P              | 1/100                | 10m             | RT          | -                  | -           | -               | -             | -                 | -                                      | AC                                     | Citrate BS                              | 121°C          | 5m  |
|                                           |                                | 10%Fo                                     | 1w          | P              | 1/100                | 60m             | RT          | -                  | -           | -               | -             | -                 | -                                      | PC                                     | Target Retrieval Solution ( Dako)       | 110°C          | 15m |
|                                           |                                | 10%Fo                                     | -           | P              | 1/100                | o/n             | 4°C         | -                  | -           | -               | -             | -                 | -                                      | AC                                     | Citrate BS                              | 121°C          | 15m |
|                                           |                                | 10%Fo                                     | 3~5d        | P              | Ready to use         | 60m             | RT          | -                  | -           | -               | -             | -                 | -                                      | PC                                     | Citrate BS                              | -              | 10m |
|                                           |                                | 10%Fo                                     | 3~5d        | P              | Ready to use         | 60m             | RT          | -                  | -           | -               | -             | -                 | -                                      | PC                                     | Citrate BS                              | -              | 10m |
|                                           |                                | 10%Fo                                     | 3~5d        | P              | Ready to use         | 60m             | RT          | Protainase K       | RT          | 2m              | 0.4 mg/mL     | -                 | -                                      | -                                      | -                                       | -              | -   |
|                                           |                                | 10%Fo                                     | -           | P              | Ready to use         | o/n             | 4°C         | -                  | -           | -               | -             | -                 | -                                      | MW                                     | Target Retrieval Solution ( pH9, Dako)  | -              | 15m |
|                                           |                                | 10%Fo                                     | 24h         | P              | Ready to use         | 40m             | 37°C        | -                  | -           | -               | -             | -                 | -                                      | -                                      | -                                       | -              | -   |
|                                           |                                | 10%Fo                                     | 3d          | P              | Ready to use         | 60m             | RT          | -                  | -           | -               | -             | -                 | -                                      | MW                                     | Target Retrieval Solution pH9 ( Dako)   | 500W           | 10m |
| 10%Fo; Unfixed (Frozen)                   | 48h                            | P; F                                      | 1/100       | P, 60m; F, 15m | RT                   | -               | -           | -                  | -           | -               | -             | AC                | Target Retrieval Solution ( Dako)      | 121°C                                  | 3m                                      |                |     |
| 10%Fo                                     | 3~7d                           | P                                         | 1/1000      | 60m            | RT                   | -               | -           | -                  | -           | -               | -             | AC                | Citrate BS                             | 121°C                                  | 20m                                     |                |     |
| 10%Fo                                     | ∞                              | P                                         | 1/100       | 25m            | RT                   | -               | -           | -                  | -           | -               | -             | AC                | BS (pH6)                               | 121°C                                  | 20m                                     |                |     |
| 10%Fo                                     | A few days (clinical specimen) | P                                         | 1/3000      | o/n            | 4°C                  | -               | -           | -                  | -           | -               | -             | AC                | Target Retrieval Solution ( Dako)      | 121°C                                  | 15m                                     |                |     |
| 10%Fo                                     | -                              | P                                         | 1/2000      | o/n            | 4°C                  | -               | -           | -                  | -           | -               | -             | PC                | Target Retrieval Solution ( pH6, Dako) | 125°C                                  | 0.5m                                    |                |     |
| 34                                        | CD3e                           | Unfixed (acetone after slice preparation) | 10m         | F              | 1/50                 | o/n             | 4°C         | -                  | -           | -               | -             | -                 | -                                      | -                                      | -                                       | -              |     |
|                                           |                                | 10%Fo                                     | -           | P              | Ready to use         | o/n             | 4°C         | -                  | -           | -               | -             | -                 | MW                                     | Immunosaver                            | -                                       | Rat, 15m; Mou, |     |
|                                           |                                | 10%Fo                                     | -           | P              | Ready to use         | o/n             | 4°C         | -                  | -           | -               | -             | -                 | MW                                     | Citrate BS                             | -                                       | 15m            |     |
| 35                                        | CD4                            | 10%Fo                                     | o/n         | P              | Ready to use         | o/n             | 4°C         | -                  | -           | -               | -             | -                 | AC                                     | Citrate BS ( pH6)                      | 121°C                                   | 15m            |     |
|                                           |                                | 10%Fo                                     | -           | P              | 1/50                 | o/n             | 4°C         | -                  | -           | -               | -             | -                 | MW                                     | HistoVT One                            | -                                       | 15m            |     |
|                                           |                                | PLP                                       | 1d          | F              | 1/500-1/1000         | 60m             | RT          | -                  | -           | -               | -             | -                 | -                                      | -                                      | -                                       | -              |     |
|                                           |                                | 10%Fo                                     | -           | -              | 1/50                 | o/n             | 4°C         | -                  | -           | -               | -             | -                 | -                                      | -                                      | -                                       | -              |     |
|                                           |                                | Unfixed (acetone after slice preparation) | 10m         | F              | 1/50                 | o/n             | 4°C         | -                  | -           | -               | -             | -                 | -                                      | -                                      | -                                       | -              |     |
|                                           |                                | Unfixed (Frozen)                          | -           | F              | 1/800                | 60m             | RT          | -                  | -           | -               | -             | -                 | -                                      | -                                      | -                                       | -              |     |
|                                           |                                | 10%Fo                                     | ∞           | P              | 1/50                 | o/n             | 4°C         | -                  | -           | -               | -             | -                 | -                                      | AC                                     | Citrate BS                              | 121°C          | 5m  |
| Unfixed (acetone after slice preparation) | 10m                            | F                                         | 1/50        | o/n            | 4°C                  | -               | -           | -                  | -           | -               | -             | -                 | -                                      | -                                      |                                         |                |     |
| 10%Fo                                     | -                              | P                                         | 1/100       | o/n            | 4°C                  | -               | -           | -                  | -           | -               | -             | MW                | Target Retrieval Solution ( pH9, Dako) | -                                      | 15m                                     |                |     |
| 36                                        | CD8α                           | 10%Fo                                     | -           | -              | 1/50                 | o/n             | 4°C         | -                  | -           | -               | -             | -                 | -                                      | -                                      | -                                       | -              |     |
|                                           |                                | Unfixed (acetone after slice preparation) | 10m         | F              | 1/50                 | o/n             | 4°C         | -                  | -           | -               | -             | -                 | -                                      | -                                      | -                                       | -              |     |
|                                           |                                | Unfixed (acetone after slice preparation) | 10m         | F              | 1/50                 | o/n             | 4°C         | -                  | -           | -               | -             | -                 | -                                      | -                                      | -                                       | -              |     |
|                                           |                                | 10%Fo                                     | -           | P              | 1/100                | o/n             | 4°C         | -                  | -           | -               | -             | -                 | AC                                     | Citrate BS                             | 121°C                                   | 15m            |     |
| 10%Fo                                     | ∞                              | P                                         | 1/100       | 30m            | RT                   | Proteinase K    | RT          | 10m                | 0.4 mg/mL   | -               | -             | -                 | -                                      | -                                      |                                         |                |     |
| 37                                        | CD11b                          | 10%Fo                                     | 24h         | F              | 1/500                | 60m             | RT          | -                  | -           | -               | -             | -                 | -                                      | -                                      | -                                       |                |     |
| 38                                        | CD11c                          | 10%Fo                                     | o/n         | P              | 1/400                | o/n             | 4°C         | -                  | -           | -               | -             | -                 | MW                                     | BS                                     | -                                       | 10m            |     |



Supplementary Table 3-3 Immunological properties of primary antibodies and IHC staining conditions

| No.      | Antibody                                           | Secondary antibody          |                                                                                               |                        |                                         |             |                 | Chromogenic substrate |                 | Photo. No. |        |           |
|----------|----------------------------------------------------|-----------------------------|-----------------------------------------------------------------------------------------------|------------------------|-----------------------------------------|-------------|-----------------|-----------------------|-----------------|------------|--------|-----------|
|          |                                                    | Kit product                 | Product                                                                                       | Supplier               | Catalog Number                          | Temperature | Incubation time | Reagent               | Incubation time |            |        |           |
| 32       | CC10                                               | Histofine Simple Stain      | Histofine® Simple Stain™ Rat MAX PO (G)                                                       | Nichirei               | 414331                                  | -           | 30m             | DAB                   | 4m              | Photo. 34  |        |           |
|          |                                                    | Histofine Simple Stain      | Histofine® Simple Stain™ Rat MAX PO (M)                                                       | Nichirei               | 414171                                  | RT          | 30m             | DAB                   | 10m             | Photo. 35  |        |           |
|          |                                                    | Envision                    | EnVision+ System- HRP Labelled Polymer                                                        | Dako                   | K4000                                   | RT          | 30m             | DAB                   | -               |            |        |           |
|          |                                                    | LSAB                        | Universal LSAB2 Kit/HRP, Rabbit/Mouse                                                         | Dako                   | K0609                                   | RT          | 30m             | DAB                   | -               |            |        |           |
|          |                                                    | LSAB                        | Universal LSAB2 Kit/HRP, Rabbit/Mouse                                                         | Dako                   | K0675                                   | RT          | 15m             | DAB                   | 5m              |            |        |           |
|          |                                                    | Histofine Simple Stain      | Histofine® Simple Stain™ Rat MAX-PO ( M )                                                     | Nichirei               | 714171                                  | RT          | 30m             | DAB                   | 10m             |            |        |           |
|          |                                                    | ABC                         | VECTOR Red Alkaline Phosphatase (AP) Substrate Kit                                            | Vector Labs            | SK-5100                                 | RT          | 30m             | VECTOR DAB            | 30m             |            |        |           |
|          |                                                    | Histofine Simple Stain      | Histofine® Simple Stain™ Rat MAX PO (MULTI)                                                   | Nichirei               | 414191                                  | RT          | 30m             | DAB                   | 1m30s           |            |        |           |
|          |                                                    | Elite ABC                   | Biotinylated Horse Anti-Mouse IgG Antibody, rat adsorbed; VECTASTAIN Elite ABC Kit (Standard) | Vector Labs            | BA-2001; PK-6100                        | RT          | 30m             | DAB                   | 45-60s          | Photo. 36  |        |           |
|          |                                                    | Envision                    | EnVision+ System- HRP Labelled Polymer Anti-Rabbit                                            | Dako                   | K4002                                   | RT          | 30m             | -                     | 3m              |            |        |           |
| 33       | CD3                                                | Histofine Simple Stain      | Histofine® Simple Stain™ Rat MAX-PO ( MULTI ) ;                                               | Nichirei               | 714191; 724142                          | RT          | 30m             | DAB                   | 10m             | Photo. 37  |        |           |
|          |                                                    | -                           | -                                                                                             | -                      | -                                       | -           | -               | DAB                   | -               |            |        |           |
|          |                                                    | Envision                    | EnVision+ System- HRP Labelled Polymer Anti-Rabbit                                            | Dako                   | K4002                                   | 37°C        | 30m             | DAB                   | 4-5m            | Photo. 38  |        |           |
|          |                                                    | Envision                    | EnVision+ System- HRP Labelled Polymer Anti-Rabbit                                            | Dako                   | K4002                                   | RT          | 30m             | DAB                   | 5m              |            |        |           |
|          |                                                    | Envision                    | EnVision™+ Dual Link System-HRP                                                               | Dako                   | K4063                                   | RT          | 30m             | DAB                   | -               |            |        |           |
|          |                                                    | Histofine Simple Stain      | Histofine® Simple Stain™ Rat MAX PO (MULTI)                                                   | Nichirei               | 414191                                  | RT          | 30m             | DAB                   | 16m             |            |        |           |
|          |                                                    | Histofine Simple Stain      | Histofine® Simple Stain™ Rat MAX PO (MULTI)                                                   | Nichirei               | 414191                                  | RT          | 30m             | DAB                   | 3m              |            |        |           |
|          |                                                    | Histofine Simple Stain      | Histofine® Simple Stain™ Rat MAX PO (MULTI)                                                   | Nichirei               | 414191                                  | RT          | 30m             | DAB                   | 6m              |            |        |           |
|          |                                                    | Histofine Simple Stain      | Histofine® Simple Stain™ Rat MAX PO (MULTI)                                                   | Nichirei               | 414191F                                 | RT          | 30m             | DAB                   | 2m30s           |            |        |           |
|          |                                                    | Envision                    | EnVision™+ Dual Link System-HRP                                                               | Dako                   | K4061                                   | 37°C        | 30m             | DAB                   | 1-2m            |            |        |           |
|          |                                                    | Envision                    | EnVision+ System- HRP Labelled Polymer Anti-Rabbit                                            | Dako                   | K4002                                   | RT          | 30m             | DAB                   | 5m              | Photo. 39  |        |           |
|          |                                                    | Envision                    | EnVision+ System- HRP Labelled Polymer Anti-Rabbit                                            | Dako                   | K4002                                   | RT          | 30m             | DAB                   | 1m              | Photo. 40  |        |           |
|          |                                                    | LSAB                        | Polyclonal Rabbit Anti-Goat Immunoglobulins/Biotinylated                                      | Dako                   | E0466                                   | RT          | 30m             | DAB                   | 5m              |            |        |           |
|          |                                                    | Histofine Simple Stain      | Histofine® SAB-PO(G)KIT                                                                       | Nichirei               | 414011                                  | RT          | 10m             | DAB                   | 5m              | Photo. 41  |        |           |
|          |                                                    | Envision+                   | Envision+ System-HRP Labelled Polymer Anti-Rabbit                                             | Dako                   | K4003                                   | RT          | 30m             | DAB                   | 3m              | Photo. 42  |        |           |
|          |                                                    | Histofine Simple Stain      | Histofine® Simple Stain™ MAX-PO(R)                                                            | Nichirei               | 424141                                  | RT          | 30m             | DAB                   | 80s             |            |        |           |
|          |                                                    | 34                          | CD3e                                                                                          | Elite ABC              | VECTASTAIN Elite ABC Kit (Standard)     | Vector Labs | PK-6100         | RT                    | 30m             | DAB        | 45-80s | Photo. 43 |
|          |                                                    |                             |                                                                                               | Histofine Simple Stain | Histofine® Simple Stain™ Rat MAX PO (R) | Nichirei    | 414181          | RT                    | 60m             | DAB        | -      |           |
| Envision | EnVision+ System- HRP Labelled Polymer Anti-Rabbit |                             |                                                                                               | Dako                   | K4002                                   | RT          | 30m             | DAB                   | -               | Photo. 44  |        |           |
| 35       | CD4                                                | -                           | -                                                                                             | -                      | -                                       | -           | -               | DAB                   | -               |            |        |           |
|          |                                                    | Histofine Simple Stain      | Histofine® Simple Stain™ Rat MAX PO (MULTI)                                                   | Nichirei               | 414191F                                 | -           | -               | -                     | -               |            |        |           |
|          |                                                    | Histofine Simple Stain      | Histofine® Simple Stain™ Mouse MAX PO (Rat)                                                   | Nichirei               | 414311                                  | RT          | 30m             | DAB                   | 10m             | Photo. 45  |        |           |
|          |                                                    | Histofine Simple Stain      | Histofine® Simple Stain™ Mouse MAX PO (R)                                                     | Nichirei               | 414341                                  | RT          | 30m             | DAB                   | 4m              |            |        |           |
|          |                                                    | Elite ABC                   | Biotinylated Horse Anti-Mouse IgG Antibody, rat adsorbed; VECTASTAIN Elite ABC Kit (Standard) | Vector Labs            | BA-2001; PK-6100                        | RT          | 30m             | DAB                   | 45-60s          | Photo. 46  |        |           |
|          |                                                    | ABC                         | VECTASTAIN ABC Kit (Mouse IgG )                                                               | Vector Labs            | PK-4002                                 | RT          | 10m             | DAB                   | 1m              |            |        |           |
|          |                                                    | Biotinylated immunoglobulin | Biotinylated Goat Anti-Rat IgG Antibody                                                       | Vector Labs            | BA-9400                                 | 37°C        | 30m             | DAB                   | 3m              | Photo. 47  |        |           |
|          |                                                    | Elite ABC                   | VECTASTAIN Elite ABC Kit (Standard)                                                           | Vector Labs            | PK-6100                                 | RT          | 30m             | DAB                   | 45-80s          |            |        |           |
| 36       | CD8α                                               | Histofine Simple Stain      | Histofine® Simple Stain™ Rat MAX PO (MULTI)                                                   | Nichirei               | 414191F                                 | RT          | 30m             | DAB                   | -               |            |        |           |
|          |                                                    | Histofine Simple Stain      | Histofine® Simple Stain™ Mouse MAX PO (R)                                                     | Nichirei               | 414341                                  | RT          | 30m             | DAB                   | 4m              |            |        |           |
|          |                                                    | Elite ABC                   | VECTASTAIN Elite ABC Kit (Standard)                                                           | Vector Labs            | PK-6100                                 | RT          | 30m             | DAB                   | 45-80s          | Photo. 48  |        |           |
|          |                                                    | Elite ABC                   | Biotinylated Horse Anti-Mouse IgG Antibody, rat adsorbed; VECTASTAIN Elite ABC Kit (Standard) | Vector Labs            | BA-2001; PK-6100                        | RT          | 30m             | DAB                   | 45-60s          | Photo. 49  |        |           |
|          |                                                    | Envision                    | EnVision™+ Dual Link System-HRP                                                               | Dako                   | K4063                                   | RT          | 30m             | DAB                   | -               | Photo. 50  |        |           |
| Envision | EnVision™+ Dual Link System-HRP                    | Dako                        | K4063                                                                                         | RT                     | 30m                                     | -           | 30s             |                       |                 |            |        |           |
| 37       | CD11b                                              | Histofine Simple Stain      | Histofine® Simple Stain™ Rat MAX-PO ( M )                                                     | Nichirei               | 714171                                  | RT          | 30m             | DAB                   | 10m             |            |        |           |
| 38       | CD11 c                                             | Elite ABC                   | VECTASTAIN Elite ABC Kit (Mouse IgG)                                                          | Vector Labs            | PK-6102                                 | RT          | 30m             | DAB                   | 1m              |            |        |           |



Supplementary Table 4-2 Immunological properties of primary antibodies and IHC staining conditions

| No.   | Antibody | Primary antibody                          |                                |           |                       |                 |             |                    |             |                 |                                   |                   |                                        |     |             |                 |
|-------|----------|-------------------------------------------|--------------------------------|-----------|-----------------------|-----------------|-------------|--------------------|-------------|-----------------|-----------------------------------|-------------------|----------------------------------------|-----|-------------|-----------------|
|       |          | Fixing solution                           | Fixing time                    | Embedding | Dilution              | Incubation time | Temperature | Protease treatment |             |                 |                                   | Antigen retrieval |                                        |     |             |                 |
|       |          |                                           |                                |           |                       |                 |             | Enzyme             | Temperature | Incubation time | Concentration                     | Method            | Solution                               |     | Temperature | Incubation time |
| 39    | CD20     | 10%Fo                                     | -                              | P         | 1/600                 | o/n             | 4°C         | -                  | -           | -               | -                                 | PC                | Target Retrieval Solution ( pH6, Dako) |     | 125°C       | 0.5m            |
|       |          | 10%Fo                                     | A few days (clinical specimen) | P         | 1/20                  | o/n             | 4°C         | -                  | -           | -               | -                                 | -                 | -                                      | -   | -           | -               |
|       |          | 10%Fo                                     | 24h                            | P         | Ready to use          | 10m             | RT          | -                  | -           | -               | -                                 | -                 | -                                      | -   | -           | -               |
|       |          | 10%Fo                                     | 24h                            | P         | -                     | -               | -           | -                  | -           | -               | -                                 | -                 | -                                      | -   | -           | -               |
| 40    | CD20cy   | 4%PFA                                     | 24h                            | AMeX-P    | Ready to use          | o/n             | 4°C         | -                  | -           | -               | -                                 | -                 | -                                      | -   | -           | -               |
|       |          | 10%Fo                                     | 3d                             | P         | Ready to use          | 60m             | RT          | -                  | -           | -               | -                                 | MW                | Target Retrieval Solution ( pH9, Dako) |     | 500W        | 10m             |
| 41    | CD21     | 10%Fo                                     | 1w                             | P         | 1/200                 | 60m             | RT          | -                  | -           | -               | -                                 | MW                | Citrate BS                             |     | 500W        | 10m             |
|       |          | 10%Fo                                     | -                              | P         | 1/2                   | o/n             | 4°C         | -                  | -           | -               | -                                 | PC                | Target Retrieval Solution ( pH6, Dako) |     | 125°C       | 0.5m            |
| 42    | CD31     | 10%Fo                                     | 24h                            | P         | 2 µg/mL               | o/n             | 4°C         | -                  | -           | -               | -                                 | MW                | Citrate BS                             |     | 98°C        | 15m             |
|       |          | 10%Fo                                     | A few days (clinical specimen) | P         | Ready to use          | o/n             | 4°C         | -                  | -           | -               | -                                 | AC                | Target Retrieval Solution ( Dako)      |     | 121°C       | 20m             |
|       |          | 4%PFA                                     | ~1y                            | F         | 1/50                  | 60m             | RT          | -                  | -           | -               | -                                 | ND                | -                                      | -   | -           | -               |
|       |          | 10%Fo                                     | 7d                             | P         | 2 µg/mL               | 60m             | RT          | -                  | -           | -               | -                                 | MW                | Target Retrieval Solution ( Dako)      |     | 500W        | 10m             |
|       |          | 10%Fo                                     | -                              | P         | 1/100                 | o/n             | 4°C         | -                  | -           | -               | -                                 | MW                | Citrate BS                             |     | -           | 15m             |
|       |          | 10%Fo                                     | 1y                             | P         | 1/100                 | 60m             | RT          | -                  | -           | -               | -                                 | Bo                | BS                                     |     | -           | 20m             |
| 43    | CD34     | 10%Fo                                     | 3~7d                           | P         | 1/5000                | 60m             | RT          | -                  | -           | -               | -                                 | AC                | S1699 (Dako)                           |     | 121°C       | 20m             |
|       |          | PLP                                       | 4h                             | P         | 1/20                  | o/n             | 4°C         | -                  | -           | -               | -                                 | BO                | Citrate BS                             |     | 95°C        | 40m             |
|       |          | 10%Fo                                     | ∞                              | P         | 1/500                 | 60m             | RT          | Proteinase K       | RT          | 10m             | 0.4 mg/mL                         | -                 | -                                      | -   | -           |                 |
|       |          | 10%Fo                                     | 1y                             | P         | 1/100                 | 60m             | RT          | -                  | -           | -               | -                                 | Bo                | BS                                     |     | -           | 20m             |
| 44    | CD45R    | 10%Fo                                     | ∞                              | P         | 1/200                 | 60m             | RT          | Proteinase K       | RT          | 10m             | 0.4 mg/mL                         | -                 | -                                      | -   | -           |                 |
|       |          | 10%Fo                                     | -                              | P         | 1/100                 | 30m             | RT          | Proteinase K       | RT          | 5m              | Ready to use                      | -                 | -                                      | -   | -           |                 |
|       |          | 10%Fo                                     | -                              | P         | 1/200                 | 30m             | RT          | Proteinase K       | RT          | 5m              | Ready to use                      | -                 | -                                      | -   | -           |                 |
|       |          | Unfixed (acetone after slice preparation) | 10m                            | F         | 1/50                  | o/n             | 4°C         | -                  | -           | -               | -                                 | -                 | -                                      | -   | -           |                 |
|       |          | 4%PFA                                     | 24h                            | AMeX-P    | 2.5 µg/mL             | o/n             | 4°C         | -                  | -           | -               | -                                 | -                 | -                                      | -   | -           |                 |
| 45    | CD45RA   | 10%Fo                                     | -                              | P         | 1/100                 | o/n             | 4°C         | -                  | -           | -               | -                                 | MW                | Citrate BS                             |     | -           | 15m             |
|       |          | Unfixed (acetone after slice preparation) | 10m                            | F         | 1/50                  | o/n             | 4°C         | -                  | -           | -               | -                                 | -                 | -                                      | -   |             |                 |
| 46    | CD61     | 10%Fo; Frozen                             | 48h                            | P; F      | P, 1/10000; F, 1/4000 | P, 60m; F, 15m  | RT          | -                  | -           | -               | -                                 | AC                | Target Retrieval Solution ( pH9, Dako) |     | 121°C       | 3m              |
|       |          | 10%Fo                                     | 24h                            | P         | 1/50~100              | 30m             | RT          | -                  | -           | -               | -                                 | BO                | Target Retrieval Solution ( Dako)      |     | 100°C       | 20m             |
| 47    | CD68     | 10%Fo                                     | 10s                            | Smear     | 1/100                 | 30m             | RT          | -                  | -           | -               | -                                 | -                 | -                                      | -   | -           |                 |
|       |          | 10%Fo                                     | ∞                              | P         | 1/100                 | o/n             | 4°C         | -                  | -           | -               | -                                 | AC                | Citrate BS                             |     | 121°C       | 5m              |
|       |          | 10%Fo                                     | -                              | P         | 1/100                 | o/n             | 4°C         | -                  | -           | -               | -                                 | MW                | Citrate BS                             |     | -           | 15m             |
|       |          | 10%Fo                                     | w                              | P         | 1/100                 | o/n             | 4°C         | -                  | -           | -               | -                                 | PC                | Citrate BS                             |     | 125°C       | 5m              |
|       |          | PLP                                       | o/n                            | P; F      | 1/300                 | 60m             | RT          | Proteinase K       | RT          | 10m             | 100 ug/ml                         | -                 | -                                      | -   | -           |                 |
|       |          | 10%Fo                                     | 3~7d                           | P         | 1/1000                | o/n             | 4°C         | -                  | -           | -               | -                                 | AC                | Citrate BS                             |     | 121°C       | 20m             |
|       |          | 10%Fo                                     | 4w                             | P         | 1/500                 | 30m             | RT          | Proteinase K       | RT          | 5~10m           | 0.0005                            | -                 | -                                      | -   | -           |                 |
|       |          | 10%Fo                                     | o/n                            | P         | 1/100                 | 60m             | RT          | Proteinase K       | RT          | 6m              | -                                 | -                 | -                                      | -   | -           |                 |
|       |          | 10%Fo                                     | ∞                              | P         | 1/200                 | 30m             | RT          | Proteinase K       | RT          | 5m              | Ready to use                      | -                 | -                                      | -   | -           |                 |
|       |          | 10%Fo                                     | 1y                             | P         | 1/100                 | 60m             | RT          | Proteinase K       | 37°C        | 2m              | Ready to use                      | -                 | -                                      | -   | -           |                 |
|       |          | 10%Fo                                     | -                              | P         | 1/500                 | o/n             | 4°C         | -                  | -           | -               | -                                 | MW                | Citrate BS                             |     | -           | 15m             |
|       |          | 10%Fo                                     | -                              | P         | 1/100                 | o/n             | 4°C         | -                  | -           | -               | -                                 | -                 | -                                      | -   | -           |                 |
|       |          | 10%Fo                                     | 48h                            | P         | 1/800~40000           | 60m             | RT          | -                  | -           | -               | -                                 | AC                | Target Retrieval Solution ( Dako)      |     | 121°C       | 3m              |
|       |          | 10%Fo                                     | -                              | P         | 1/100                 | o/n             | 4°C         | -                  | -           | -               | -                                 | MW                | Citrate BS                             |     | -           | 10m             |
|       |          | 10%Fo                                     | -                              | P         | 1/2000                | o/n             | 4°C         | Trypsin            | 37°C        | 30m             | -                                 | -                 | -                                      | -   | -           |                 |
|       |          | 10%Fo                                     | o/n                            | P         | 1/500                 | 60m             | 37°C        | Trypsin            | 37°C        | 10m             | *1000                             | -                 | -                                      | -   | -           |                 |
|       |          | 10%Fo; 4%PFA; MD                          | 1d~1w                          | P         | 1/200~400             | 60m             | RT          | Proteinase K       | RT          | 6m              | Ready to use                      | MW                | Citrate BS (pH6), Immunosaver          |     | -           | -               |
| 10%Fo | 1w       | P                                         | 1/100                          | 60m       | RT                    | -               | -           | -                  | -           | MW              | Target Retrieval Solution ( Dako) |                   | 500W                                   | 20m |             |                 |
| 10%Fo | ∞        | P                                         | 1/40                           | 60m       | RT                    | Proteinase K    | RT          | 8m                 | -           | -               | -                                 | -                 | -                                      |     |             |                 |

Supplementary Table 4-3 Immunological properties of primary antibodies and IHC staining conditions

| No.                    | Antibody                                      | Secondary antibody                 |                                                                                               |             |                  |             |                 | Chromogenic substrate |                 | Photo. No. |
|------------------------|-----------------------------------------------|------------------------------------|-----------------------------------------------------------------------------------------------|-------------|------------------|-------------|-----------------|-----------------------|-----------------|------------|
|                        |                                               | Kit product                        | Product                                                                                       | Supplier    | Catalog Number   | Temperature | Incubation time | Reagent               | Incubation time |            |
| 39                     | CD20                                          | Histofine Simple Stain             | Histofine® Simple Stain™ MAX-PO(R)                                                            | Nichirei    | 424141           | RT          | 30m             | DAB                   | 2m              |            |
|                        |                                               | Envision+                          | Envision+ System-HRP Labelled Polymer Anti-Rabbit                                             | Dako        | K4003            | RT          | 30m             | DAB                   | 3m              | Photo. 51  |
|                        |                                               | Envision                           | EnVision™+ Dual Link System-HRP                                                               | Dako        | K4061            | 37°C        | 30m             | DAB                   | 1~2m            |            |
|                        |                                               | Envision                           | EnVision™+ Dual Link System-HRP                                                               | Dako        | K4061            | 37°C        | 30m             | DAB                   | 1~2m            |            |
| 40                     | CD20cy                                        | Histofine Simple Stain             | Histofine® Simple Stain™ Rat MAX PO (MULTI)                                                   | Nichirei    | 414191F          | RT          | 30m             | DAB                   | 1m 30s          |            |
|                        |                                               | Envision                           | EnVision+ System- HRP Labelled Polymer                                                        | Dako        | K4000            | RT          | 30m             | DAB                   | -               |            |
| 41                     | CD21                                          | Envision                           | EnVision+ System- HRP Labelled Polymer Anti-Rabbit                                            | Dako        | K4002            | RT          | 30m             | DAB                   | 5m              | Photo. 52  |
|                        |                                               | Envision                           | EnVision+ System- HRP Labelled Polymer Anti-Rabbit                                            | Dako        | K4002            | RT          | 30m             | DAB                   | 1m              | Photo. 53  |
| 42                     | CD31                                          | Histofine Simple Stain             | Histofine® Simple Stain™ MAX-PO(M)                                                            | Nichirei    | 424131           | RT          | 30m             | DAB                   | 2m              |            |
|                        |                                               | Envision                           | EnVision+ System- HRP Labelled Polymer                                                        | Dako        | K4000            | RT          | 30m             | DAB                   | -               |            |
|                        |                                               | Envision+                          | Envision+ System-HRP Labelled Polymer Anti-mouse                                              | Dako        | K4001            | RT          | 30m             | DAB                   | 3m              | Photo. 54  |
|                        |                                               | Fluorophore labeled immunoglobulin | Goat Anti-Rat IgG H&L (Alexa Fluor® 568) preadsorbed                                          | Abcam       | 175710           | RT          | 60m             | -                     | -               |            |
|                        |                                               | Biotinylated immunoglobulin        | Biotinylated Rabbit Anti-Rat Immunoglobulins                                                  | Dako        | E0468            | RT          | 30m             | DAB                   | 5m              | Photo. 55  |
|                        |                                               | Histofine Simple Stain             | Histofine® Simple Stain™ Rat MAX PO (MULTI)                                                   | Nichirei    | 414191           | RT          | 30m             | DAB                   | 1~2m            | Photo. 56  |
| 43                     | CD34                                          | Histofine Simple Stain             | Histofine® Simple Stain™ Rat MAX PO (G)                                                       | Nichirei    | 414331           | RT          | 30m             | DAB                   | 30s             | Photo. 57  |
|                        |                                               | Histofine Simple Stain             | Histofine® Simple Stain™ Rat MAX PO (MULTI)                                                   | Nichirei    | 414191           | RT          | 30m             | DAB                   | 5m              |            |
|                        |                                               | Envision                           | EnVision™+ Dual Link System-HRP                                                               | Dako        | K4063            | RT          | 60m             | DAB                   | 2m              |            |
|                        |                                               | Histofine Simple Stain             | Histofine® Simple Stain™ Rat MAX PO (G)                                                       | Nichirei    | 414331           | RT          | 60m             | -                     | 1m              |            |
| 44                     | CD45R                                         | Histofine Simple Stain             | Histofine® Simple Stain™ Rat MAX PO (G)                                                       | Nichirei    | 414331           | RT          | 30m             | DAB                   | 30s             | Photo. 58  |
|                        |                                               | Histofine Simple Stain             | Histofine® Simple Stain™ Mouse MAX PO (Rat)                                                   | Nichirei    | 414311           | RT          | 30m             | -                     | 3m              |            |
|                        |                                               | Histofine Simple Stain             | Histofine® Simple Stain™ Mouse MAX PO (Rat)                                                   | Nichirei    | 414311           | RT          | 30m             | DAB                   | 4m              |            |
|                        |                                               | Histofine Simple Stain             | Histofine® Simple Stain™ Mouse MAX PO (Rat)                                                   | Nichirei    | 414311           | RT          | 30m             | DAB                   | 4m              |            |
|                        |                                               | Elite ABC                          | VECTASTAIN Elite ABC Kit (Standard)                                                           | Vector Labs | PK-6100          | RT          | 30m             | DAB                   | 45~80s          | Photo. 59  |
|                        |                                               | LSAB                               | Universal LSAB2 Kit/HRP, Rabbit/Mouse                                                         | Dako        | K0609            | RT          | 30m             | DAB                   | -               |            |
| 45                     | CD45RA                                        | Envision                           | EnVision+ System- HRP Labelled Polymer                                                        | Dako        | K4000            | RT          | 30m             | DAB                   | -               | Photo. 60  |
|                        |                                               | Elite ABC                          | Biotinylated Horse Anti-Mouse IgG Antibody, rat adsorbed; VECTASTAIN Elite ABC Kit (Standard) | Vector Labs | BA-2001; PK-6100 | RT          | 30m             | DAB                   | 45~60s          | Photo. 61  |
|                        |                                               | Histofine Simple Stain             | Histofine® Simple Stain™ Rat MAX PO (MULTI)                                                   | Nichirei    | 414191           | RT          | 30m             | DAB                   | 1m30s           | Photo. 62  |
| 46                     | CD61                                          | Envision                           | EnVision™+ Dual Link System-HRP                                                               | Dako        | K4061            | 37°C        | 30m             | DAB                   | 1~2m            |            |
|                        |                                               | Envision                           | EnVision+ System- HRP Labelled Polymer                                                        | Dako        | K4000            | RT          | 30m             | -                     | 4m              |            |
| 47                     | CD68                                          | Envision                           | EnVision+ System- HRP Labelled Polymer                                                        | Dako        | K4000            | 37°C        | 30m             | DAB                   | 1m30s           | Photo. 63  |
|                        |                                               | Envision                           | EnVision™+ Dual Link System-HRP                                                               | Dako        | K4063            | RT          | 30m             | DAB                   | -               |            |
|                        |                                               | Envision                           | EnVision™+ Dual Link System-HRP                                                               | Dako        | K4063            | RT          | 30m             | DAB                   | 3m              |            |
|                        |                                               | Histofine Simple Stain             | Histofine® Simple Stain™ Rat MAX-PO ( M )                                                     | Nichirei    | 714171           | RT          | 30m             | DAB                   | 10m             |            |
|                        |                                               | LSAB                               | Polyclonal Rabbit Anti-Mouse Immunoglobulins, Biotinylated affinity-isolated F(ab')2          | Dako        | E0413            | RT          | 30m             | DAB                   | 5m              |            |
|                        |                                               | Histofine Simple Stain             | Histofine® Simple Stain™ Rat MAX-PO ( MULTI )                                                 | Nichirei    | 714191           | RT          | 30m             | DAB                   | 1~5m            |            |
|                        |                                               | -                                  | -                                                                                             | -           | -                | -           | -               | DAB                   | -               |            |
|                        |                                               | Histofine Simple Stain             | Histofine® Simple Stain™ Rat MAX PO (M)                                                       | Nichirei    | 414171           | RT          | 30m             | DAB                   | 4m              |            |
|                        |                                               | Histofine Simple Stain             | Histofine® Simple Stain™ Rat MAX PO (MULTI)                                                   | Nichirei    | 414191           | RT          | 30m             | DAB                   | 30s             | Photo. 64  |
|                        |                                               | Histofine Simple Stain             | Histofine® Simple Stain™ Rat MAX PO (M)                                                       | Nichirei    | 414171           | RT          | 30m             | DAB                   | 30s             |            |
|                        |                                               | Envision                           | EnVision+ System- HRP Labelled Polymer                                                        | Dako        | K4000            | RT          | 30m             | DAB                   | -               |            |
|                        |                                               | Histofine Simple Stain             | Histofine® Simple Stain™ Rat MAX PO (MULTI)                                                   | Nichirei    | 414191           | RT          | 30m             | DAB                   | 1m              | Photo. 65  |
|                        |                                               | Histofine Simple Stain             | Histofine® Simple Stain™ Rat MAX PO (MULTI)                                                   | Nichirei    | 414191F          | RT          | 30m             | DAB                   | 2m              |            |
|                        |                                               | Elite ABC                          | Biotinylated Horse Anti-Mouse IgG Antibody, rat adsorbed                                      | Vector Labs | BA-2001          | RT          | 30m             | DAB                   | 4~5m            | Photo. 66  |
|                        |                                               | Elite ABC                          | VECTASTAIN Elite ABC Kit (Mouse IgG)                                                          | Vector Labs | PK-6102          | RT          | 30m             | DAB                   | 2m              |            |
| Histofine Simple Stain | Histofine® Simple Stain™ Rat MAX-PO ( MULTI ) | Nichirei                           | 714191                                                                                        | RT          | 30m              | DAB         | 10m             |                       |                 |            |
| Envision               | EnVision+ System- HRP Labelled Polymer        | Dako                               | K4000                                                                                         | RT          | 30m              | DAB         | 5m              |                       |                 |            |
| Envision               | EnVision+ System- HRP Labelled Polymer        | Dako                               | K1390                                                                                         | -           | 20m              | DAB         | 45s             |                       |                 |            |



Supplementary Table 5-2 Immunological properties of primary antibodies and IHC staining conditions

| No. | Antibody          | Primary antibody |                                |           |              |                 |             |                                 |             |                 |               |                   |          |                                        |                 |      |
|-----|-------------------|------------------|--------------------------------|-----------|--------------|-----------------|-------------|---------------------------------|-------------|-----------------|---------------|-------------------|----------|----------------------------------------|-----------------|------|
|     |                   | Fixing solution  | Fixing time                    | Embedding | Dilution     | Incubation time | Temperature | Protease treatment              |             |                 |               | Antigen retrieval |          |                                        |                 |      |
|     |                   |                  |                                |           |              |                 |             | Enzyme                          | Temperature | Incubation time | Concentration | Method            | Solution | Temperature                            | Incubation time |      |
| 47  | CD68              | 10%Fo            | 24h                            | P         | Ready to use | -               | -           | -                               | -           | -               | -             | -                 | -        | -                                      | -               | -    |
|     |                   | 10%Fo            | 24h                            | P         | 1 µg/mL      | o/n             | 4°C         | -                               | -           | -               | -             | -                 | MW       | Citrate BS                             | 98°C            | 15m  |
|     |                   | 10%Fo            | ∞                              | P         | 1/50         | o/n             | 4°C         | -                               | -           | -               | -             | -                 | BO       | Citrate BS                             | 95°C            | 40m  |
|     |                   | 10%Fo            | 48h                            | P         | 1/2000       | 60m             | RT          | -                               | -           | -               | -             | -                 | AC       | Target Retrieval Solution ( Dako)      | 121°C           | 3m   |
|     |                   | 10%Fo            | 24h                            | P         | 1 µg/mL      | o/n             | 4°C         | -                               | -           | -               | -             | -                 | MW       | Citrate BS                             | 98°C            | 10m  |
| 48  | CD77              | 10%Fo            | ∞                              | P         | 1/250        | 30m             | RT          | -                               | -           | -               | -             | -                 | MW       | Citrate BS (pH9)                       | -               | 10m  |
|     |                   | 10%Fo            | ∞                              | F         | 1/100        | o/n             | 4°C         | -                               | -           | -               | -             | -                 | -        | -                                      | -               | -    |
| 49  | CD79α             | 10%Fo            | 1d~1w                          | P         | 1/50         | 60m             | RT          | -                               | -           | -               | -             | -                 | MW       | Immunosaver, Tris-HCl (pH9)            | -               | 3m   |
|     |                   | 10%Fo            | o/n                            | P         | 1/4000       | o/n             | 4°C         | -                               | -           | -               | -             | -                 | AC       | Citrate BS ( pH6)                      | 121°C           | 15m  |
|     |                   | 10%Fo            | o/n                            | P         | -            | -               | -           | -                               | -           | -               | -             | -                 | -        | -                                      | -               | -    |
|     |                   | 10%Fo            | -                              | P         | 1/200        | o/n             | 4°C         | -                               | -           | -               | -             | -                 | MW       | Citrate BS                             | -               | 15m  |
| 50  | CD90/Thy 1        | PLP              | 4h                             | P         | 1/200        | o/n             | 4°C         | -                               | -           | -               | -             | -                 | BO       | Citrate BS                             | 95°C            | 40m  |
|     |                   | 10%Fo            | ∞                              | P         | 1/50         | 60m             | RT          | -                               | -           | -               | -             | -                 | PC       | EDTA                                   | -               | -    |
| 51  | CD117/c-kit       | 10%Fo            | 24h                            | P         | 1/400~600    | 30m             | RT          | -                               | -           | -               | -             | -                 | BO       | Target Retrieval Solution ( Dako)      | 100°C           | 20m  |
|     |                   | 10%Fo            | A few days (clinical specimen) | P         | 1/200        | o/n             | 4°C         | -                               | -           | -               | -             | -                 | AC       | Target Retrieval Solution ( Dako)      | 121°C           | 20m  |
|     |                   | 10%Fo            | w                              | P         | 1/400~600    | o/n             | 4°C         | -                               | -           | -               | -             | -                 | AC       | Citrate BS                             | -               | 20m  |
|     |                   | 10%Fo            | -                              | P         | 1/100        | 30m             | RT          | -                               | -           | -               | -             | -                 | PC       | Target Retrieval Solution ( pH9, Dako) | 125°C           | 0.5m |
|     |                   | 10%Fo            | -                              | P         | 1/100        | o/n             | 4°C         | -                               | -           | -               | -             | -                 | AC       | Citrate BS                             | 121°C           | 15m  |
| 52  | CD138             | 10%Fo            | ∞                              | P         | 1/1000       | o/n             | 4°C         | -                               | -           | -               | -             | -                 | AC       | Citrate BS                             | 121°C           | 5m   |
| 53  | CD163             | 10%Fo            | -                              | P         | 1/100        | 30m             | RT          | Proteinase K                    | RT          | 5m              | Ready to use  | -                 | -        | -                                      | -               |      |
|     |                   | Zamboni          | o/n                            | P         | 1/100        | 30m             | RT          | Proteinase K                    | RT          | 6m              | -             | -                 | -        | -                                      | -               |      |
|     |                   | PLP              | o/n                            | P, F      | 1/300        | 60m             | RT          | Proteinase K                    | RT          | 10m             | 100 ug/ml     | -                 | -        | -                                      | -               |      |
|     |                   | Methacam         | 1D                             | P         | 1/100        | 60m             | RT          | Proteinase K                    | 37°C        | 10m             | Ready to use  | -                 | -        | -                                      | -               |      |
|     |                   | 10%Fo; 4%PFA     | 1d~1w                          | P         | 1/200        | 60m             | RT          | Proteinase K                    | RT          | 6m              | Ready to use  | -                 | -        | -                                      | -               |      |
| 54  | CD204             | 10%Fo            | 2~3d                           | P         | 1/500        | 60m             | RT          | -                               | -           | -               | -             | -                 | MW       | Citrate BS (pH9 )                      | -               | 5m×4 |
|     |                   | 10%Fo            | -                              | P         | 1/800        | o/n             | 4°C         | -                               | -           | -               | -             | -                 | MW       | HistoVT One                            | -               | 15m  |
|     |                   | 10%Fo            | A few days (clinical specimen) | P         | 1/200        | o/n             | 4°C         | -                               | -           | -               | -             | -                 | AC       | Target Retrieval Solution ( Dako)      | 121°C           | 20m  |
|     |                   | 10%Fo; PLP       | o/n; 24h                       | P, F      | 1/500        | 60m             | RT          | -                               | -           | -               | -             | -                 | MW       | Citrate BS                             | 95°C            | 20m  |
| 55  | Cdc2              | 10%Fo            | -                              | P         | 1/1000       | o/n             | 4°C         | -                               | -           | -               | -             | -                 | MW       | Citrate BS                             | -               | 15m  |
| 56  | Cdk2              | 10%Fo            | -                              | P         | 1/1000       | o/n             | 4°C         | -                               | -           | -               | -             | -                 | MW       | Citrate BS                             | -               | 15m  |
| 57  | CDX2              | 10%Fo            | ∞                              | P         | 1/50         | 30m             | RT          | -                               | -           | -               | -             | -                 | MW       | Citrate BS (pH9)                       | -               | 10m  |
| 58  | Chlamydia         | 10%Fo            | 3~7d                           | P         | 1/8000       | 60m             | RT          | -                               | -           | -               | -             | -                 | AC       | 1mM EDTA                               | 121°C           | 20m  |
| 59  | Chromogranin A    | 10%Fo            | o/n                            | P         | 1/1000       | o/n             | 4°C         | -                               | -           | -               | -             | -                 | BO       | Immunosaver                            | 98°C            | 45m  |
| 60  | Claudin 11        | 10%Fo            | -                              | P         | 1/100        | o/n             | 4°C         | -                               | -           | -               | -             | -                 | MW       | Citrate BS                             | -               | 15m  |
|     |                   | 10%Fo            | -                              | P         | 1/100        | o/n             | 4°C         | -                               | -           | -               | -             | -                 | MW       | Citrate BS                             | -               | 15m  |
| 61  | Cleaved Caspase-3 | 10%Fo            | -                              | P         | 1/800        | o/n             | 4°C         | -                               | -           | -               | -             | -                 | MW       | Citrate BS                             | -               | 15m  |
|     |                   | 10%Fo            | 3~7d                           | P         | 1/3000       | o/n             | 4°C         | -                               | -           | -               | -             | -                 | AC       | 1mM EDTA (pH8)                         | 121°C           | 20m  |
|     |                   | 10%Fo            | 3~6d                           | P         | 1/600        | o/n             | 4°C         | -                               | -           | -               | -             | -                 | PC       | Target Retrieval Solution ( pH9, Dako) | -               | 10m  |
| 62  | Clusterin         | 10%Fo            | -                              | P         | 1/50         | o/n             | 4°C         | -                               | -           | -               | -             | -                 | -        | -                                      | -               |      |
| 63  | c-Met             | 10%Fo            | ∞                              | P         | 1/50         | 60m             | RT          | -                               | -           | -               | -             | -                 | -        | -                                      | -               |      |
|     |                   | 10%Fo            | 3d                             | P         | 2 µg/mL      | 60m             | RT          | -                               | -           | -               | -             | -                 | MW       | Target Retrieval Solution ( pH9, Dako) | 500W            | 20m  |
| 64  | Collagen type I   | 10%Fo            | ∞                              | P         | 1/1600       | 60m             | RT          | -                               | -           | -               | -             | -                 | MW       | Citrate BS (pH6)                       | -               | 10m  |
|     |                   | 10%Fo            | 3~7d                           | P         | 1/200        | 60m             | RT          | -                               | -           | -               | -             | -                 | MW       | Immunosaver                            | -               | -    |
|     |                   | 10%Fo            | 1m                             | P         | 1/500        | 60m             | RT          | Hyaluronidase                   | 37°C        | 15m             | 0.2%          | -                 | -        | -                                      | -               |      |
| 65  | Collagen type II  | 4%PFA            | 1w                             | P         | 1/100        | 60m             | RT          | Bovine testicular hyaluronidase | RT          | 30m             | 2%            | -                 | -        | -                                      | -               |      |
| 66  | Collagen type III | 10%Fo            | 3~7d                           | P         | 1/50         | 60m             | RT          | Proteinase K                    | RT          | 5m              | Ready to use  | -                 | -        | -                                      | -               |      |
|     |                   | 10%Fo            | 3~7d                           | P         | 1/12000      | o/n             | 4°C         | -                               | -           | -               | -             | -                 | MW       | DW                                     | -               | -    |
|     |                   | 10%Fo            | 1m                             | P         | 1/200        | 60m             | RT          | Hyaluronidase                   | 37°C        | 15m             | 0.2%          | -                 | -        | -                                      | -               |      |

Supplementary Table 5-3 Immunological properties of primary antibodies and IHC staining conditions

| No.      | Antibody                                           | Secondary antibody          |                                                                                      |                   |                |             |                 | Chromogenic substrate |                 | Photo. No. |  |
|----------|----------------------------------------------------|-----------------------------|--------------------------------------------------------------------------------------|-------------------|----------------|-------------|-----------------|-----------------------|-----------------|------------|--|
|          |                                                    | Kit product                 | Product                                                                              | Supplier          | Catalog Number | Temperature | Incubation time | Reagent               | Incubation time |            |  |
| 47       | CD68                                               | Envision                    | EnVision™+ Dual Link System-HRP                                                      | Dako              | K4061          | 37°C        | 30m             | DAB                   | 1~2m            |            |  |
|          |                                                    | Envision                    | EnVision+ System- HRP Labelled Polymer                                               | Dako              | K4000          | RT          | 30m             | DAB                   | -               |            |  |
|          |                                                    | Envision                    | EnVision™+ Dual Link System-HRP                                                      | Dako              | K4063          | RT          | 60m             | DAB                   | 2m              | Photo. 67  |  |
|          |                                                    | Envision                    | EnVision+ System- HRP Labelled Polymer                                               | Dako              | K4000          | RT          | 30m             | DAB                   | 1m              |            |  |
|          |                                                    | Envision                    | EnVision+ System- HRP Labelled Polymer                                               | Dako              | K4000          | RT          | 30m             | DAB                   | -               |            |  |
|          |                                                    | Envision                    | EnVision+ System- HRP Labelled Polymer Anti-Rabbit                                   | Dako              | K4002          | RT          | 30m             | -                     | 3m              |            |  |
| 48       | CD77                                               | Alexa Fluor                 | Goat anti-Rat IgM Heavy Chain Secondary Antibody, Alexa Fluor® 488 conjugate         | Life Technologies | A-21212        | RT          | 30m             | -                     | -               | Photo. 68  |  |
| 49       | CD79α                                              | Histofine Simple Stain      | Histofine® Simple Stain™ Rat MAX-PO ( MULTI ) ;                                      | Nichirei          | 714191; 724132 | RT          | 30m             | DAB                   | 10m             | Photo. 69  |  |
|          |                                                    | -                           | -                                                                                    | -                 | -              | -           | -               | DAB                   | -               |            |  |
|          |                                                    | -                           | -                                                                                    | -                 | -              | -           | -               | -                     | DAB             | -          |  |
|          |                                                    | Envision                    | EnVision+ System- HRP Labelled Polymer Anti-Rabbit                                   | Dako              | K4002          | RT          | 30m             | DAB                   | -               |            |  |
| 50       | CD90/Thy 1                                         | Envision                    | EnVision™+ Dual Link System-HRP                                                      | Dako              | K4063          | RT          | 60m             | DAB                   | 2m              | Photo. 70  |  |
| 51       | CD117/c-kit                                        | Histofine Simple Stain      | Histofine® Simple Stain™ Rat MAX PO (R)                                              | Nichirei          | 414181         | RT          | 30m             | DAB                   | -               | Photo. 71  |  |
|          |                                                    | Envision                    | EnVision™+ Dual Link System-HRP                                                      | Dako              | K4061          | 37°C        | 30m             | DAB                   | 1~2m            |            |  |
|          |                                                    | Envision+                   | Envision+ System-HRP Labelled Polymer Anti-Rabbit                                    | Dako              | K4003          | RT          | 30m             | DAB                   | 3m              |            |  |
|          |                                                    | LSAB                        | Universal LSAB2 Kit/HRP, Rabbit/Mouse                                                | Dako              | K0675          | RT          | 15m             | DAB                   | 5m              |            |  |
|          |                                                    | Histofine Simple Stain      | Histofine® Simple Stain™ Rat MAX PO (R)                                              | Nichirei          | 414181         | RT          | 30m             | DAB                   | 4m              |            |  |
| Envision | EnVision+ System- HRP Labelled Polymer Anti-Rabbit | Dako                        | K4002                                                                                | RT                | 30m            | DAB         | -               |                       |                 |            |  |
| 52       | CD138                                              | Biotinylated immunoglobulin | Biotinylated Goat Anti-Rat IgG Antibody                                              | Vector Labs       | BA-9400        | 37°C        | 30m             | DAB                   | 2m30s           |            |  |
| 53       | CD163                                              | Histofine Simple Stain      | Histofine® Simple Stain™ Rat MAX PO (M)                                              | Nichirei          | 414171         | RT          | 30m             | DAB                   | 4m              |            |  |
|          |                                                    | -                           | -                                                                                    | -                 | -              | -           | -               | DAB                   | -               |            |  |
|          |                                                    | Histofine Simple Stain      | Histofine® Simple Stain™ Rat MAX-PO ( M )                                            | Nichirei          | 714171         | RT          | 30m             | DAB                   | 10m             |            |  |
|          |                                                    | Histofine Simple Stain      | Histofine® Simple Stain™ Rat MAX PO (MULTI)                                          | Nichirei          | 414191         | RT          | 30m             | DAB                   | 30s             | Photo. 72  |  |
|          |                                                    | Histofine Simple Stain      | Histofine® Simple Stain™ Rat MAX-PO ( MULTI )                                        | Nichirei          | 714191         | RT          | 30m             | DAB                   | 10m             |            |  |
| 54       | CD204                                              | Envision                    | EnVision™+ Dual Link System-HRP                                                      | Dako              | K4063          | RT          | 1h              | DAB                   | 30~90s          |            |  |
|          |                                                    | Histofine Simple Stain      | Histofine® Simple Stain™ Rat MAX PO (MULTI)                                          | Nichirei          | 414191F        | RT          | 30m             | DAB                   | 1m              |            |  |
|          |                                                    | Envision+                   | Envision+ System-HRP Labelled Polymer Anti-mouse                                     | Dako              | K4001          | RT          | 30m             | DAB                   | 3m              | Photo. 73  |  |
|          |                                                    | Histofine Simple Stain      | Histofine® Simple Stain™ Rat MAX-PO ( M )                                            | Nichirei          | 714171         | RT          | 30m             | DAB                   | 10m             |            |  |
| 55       | Cdc2                                               | SAB                         | Histofine® SimpleStain SAB-PO(MULTI)                                                 | Nichirei          | 424043         | -           | -               | -                     | -               |            |  |
| 56       | Cdk2                                               | SAB                         | Histofine® SimpleStain SAB-PO(MULTI)                                                 | Nichirei          | 424043         | -           | -               | -                     | -               |            |  |
| 57       | CDX2                                               | Envision                    | EnVision+ System- HRP Labelled Polymer                                               | Dako              | K4000          | RT          | 30m             | -                     | 5m              |            |  |
| 58       | Chlamydia                                          | LSAB                        | Polyclonal Rabbit Anti-Mouse Immunoglobulins, Biotinylated affinity-isolated F(ab')2 | Dako              | E0413          | RT          | 30m             | DAB                   | 5m              |            |  |
| 59       | Chromogranin A                                     | -                           | -                                                                                    | -                 | -              | -           | -               | DAB                   | -               |            |  |
| 60       | Claudin 11                                         | Histofine Simple Stain      | Histofine® Simple Stain™ Rat MAX PO (MULTI)                                          | Nichirei          | 414191F        | RT          | 30m             | DAB                   | -               |            |  |
|          |                                                    | Histofine Simple Stain      | Histofine® Simple Stain™ Rat MAX PO (MULTI)                                          | Nichirei          | 414191F        | RT          | 30m             | DAB                   | -               |            |  |
| 61       | Cleaved Caspase-3                                  | Histofine Simple Stain      | Histofine® Simple Stain™ Rat MAX PO (MULTI)                                          | Nichirei          | 414191F        | -           | -               | -                     | -               |            |  |
|          |                                                    | Envision+                   | Envision+ System-HRP Labelled Polymer Anti-Rabbit                                    | Dako              | K4003          | RT          | 30m             | DAB                   | 5m              |            |  |
|          |                                                    | Histofine Simple Stain      | Histofine® Simple Stain™ Rat MAX PO (MULTI)                                          | Nichirei          | 414191         | RT          | 30m             | DAB                   | 6~15m           |            |  |
| 62       | Clusterin                                          | Histofine Simple Stain      | Histofine® Simple Stain™ Rat MAX PO (G)                                              | Nichirei          | 414331         | RT          | 30m             | DAB                   | 1~2m            | Photo. 74  |  |
| 63       | c-Met                                              | Histofine Simple Stain      | Histofine® Simple Stain™ Rat MAX PO (MULTI)                                          | Nichirei          | 414191         | -           | -               | -                     | -               |            |  |
|          |                                                    | Envision                    | EnVision+ System- HRP Labelled Polymer Anti-Rabbit                                   | Dako              | K4002          | RT          | 30m             | DAB                   | 5m              |            |  |
| 64       | Collagen type I                                    | Envision                    | EnVision+ System- HRP Labelled Polymer Anti-Rabbit                                   | Dako              | K4002          | RT          | 30m             | -                     | 1m              |            |  |
|          |                                                    | Envision+                   | Envision+ System-HRP Labelled Polymer Anti-Rabbit                                    | Dako              | K4003          | RT          | 30m             | DAB                   | 5m              |            |  |
|          |                                                    | Histofine Simple Stain      | Histofine® Simple Stain™ Rat MAX PO (MULTI)                                          | Nichirei          | 414191         | RT          | 30m             | DAB                   | 30s             | Photo. 75  |  |
| 65       | Collagen type II                                   | Envision                    | Envision+ System-HRP Labelled Polymer Anti-mouse                                     | Dako              | K4006          | RT          | 30m             | DAB                   | 1m              | Photo. 76  |  |
| 66       | Collagen type III                                  | Envision+                   | Envision+ System-HRP Labelled Polymer Anti-Rabbit                                    | Dako              | K4003          | RT          | 30m             | DAB                   | 5m              |            |  |
|          |                                                    | Envision+                   | Envision+ System-HRP Labelled Polymer Anti-Rabbit                                    | Dako              | K4003          | RT          | 30m             | DAB                   | 5m              |            |  |
|          |                                                    | Histofine Simple Stain      | Histofine® Simple Stain™ Rat MAX PO (MULTI)                                          | Nichirei          | 414191         | RT          | 30m             | DAB                   | 30s             | Photo. 77  |  |





Supplementary Table 6-2 Immunological properties of primary antibodies and IHC staining conditions

| No.   | Antibody                          | Primary antibody |                                |           |              |                 |             |                    |             |                 |               |                   |                                        |             |                 |
|-------|-----------------------------------|------------------|--------------------------------|-----------|--------------|-----------------|-------------|--------------------|-------------|-----------------|---------------|-------------------|----------------------------------------|-------------|-----------------|
|       |                                   | Fixing solution  | Fixing time                    | Embedding | Dilution     | Incubation time | Temperature | Protease treatment |             |                 |               | Antigen retrieval |                                        |             |                 |
|       |                                   |                  |                                |           |              |                 |             | Enzyme             | Temperature | Incubation time | Concentration | Method            | Solution                               | Temperature | Incubation time |
| 67    | Collagen type IV                  | 10%Fo            | 3~7d                           | P         | 1/500        | o/n             | 4°C         | -                  | -           | -               | -             | AC                | Citrate BS                             | 121°C       | 20m             |
| 68    | Connexin 32                       | 10%Fo            | -                              | P         | 1/50         | o/n             | 4°C         | -                  | -           | -               | -             | -                 | -                                      | -           | -               |
|       |                                   | -                | -                              | F         | 1/1000       | 60m             | RT          | -                  | -           | -               | -             | -                 | -                                      | -           | -               |
| 69    | CXCR3                             | 10%Fo            | -                              | P         | 1/100        | o/n             | 4°C         | -                  | -           | -               | -             | MW                | Target Retrieval Solution ( pH9, Dako) | -           | 15m             |
| 70    | Cyclin D1                         | 10%Fo            | 5m                             | P         | Ready to use | 60m             | RT          | -                  | -           | -               | -             | Bo                | BS                                     | -           | 20m             |
|       |                                   | 10%Fo            | ∞                              | P         | Ready to use | 60m             | RT          | -                  | -           | -               | -             | PC                | Citrate BS                             | -           | 10m             |
| 71    | Cyclooxygenase-2                  | 10%Fo            | w                              | P         | 1/50         | o/n             | 4°C         | -                  | -           | -               | -             | PC                | Citrate BS                             | 125°C       | 5m              |
|       |                                   | 10%Fo            | w                              | P         | 1/100        | o/n             | 4°C         | -                  | -           | -               | -             | PC                | Citrate BS                             | 125°C       | 5m              |
|       |                                   | 10%Fo            | -                              | P         | 1/200        | 30m             | RT          | -                  | -           | -               | -             | ND                | -                                      | -           | -               |
|       |                                   | 10%Fo            | -                              | P         | 1/600        | 30m             | RT          | -                  | -           | -               | -             | MW                | Citrate BS                             | -           | 15m             |
| 72    | Cystatin C                        | 10%Fo            | -                              | P         | 1/1000       | o/n             | 4°C         | -                  | -           | -               | -             | MW                | Citrate BS                             | -           | 10m             |
| 73    | Cytochrome P450 3A1               | 10%Fo            | 4d                             | P         | 1/5000       | o/n             | 4°C         | -                  | -           | -               | -             | -                 | -                                      | -           | -               |
| 74    | Cytochrome P450 CYP2B1            | 10%Fo            | 3~5d                           | P         | 1/2000       | 60m             | RT          | -                  | -           | -               | -             | -                 | -                                      | -           | -               |
| 75    | Cytokeratin                       | 10%Fo            | w                              | P         | 1/200        | o/n             | 4°C         | -                  | -           | -               | -             | AC                | Citrate BS                             | -           | 20m             |
|       |                                   | 10%Fo            | w                              | P         | 1/100        | o/n             | 4°C         | -                  | -           | -               | -             | AC                | Citrate BS                             | -           | 20m             |
|       |                                   | 10%Fo            | ∞                              | P         | Ready to use | o/n             | 4°C         | -                  | -           | -               | -             | AC                | Citrate BS                             | 121°C       | 5m              |
|       |                                   | 10%Fo            | 24h                            | P         | Ready to use | o/n             | 4°C         | -                  | -           | -               | -             | MW                | Citrate BS                             | 98°C        | 20m             |
|       |                                   | 10%Fo            | ∞                              | P         | Ready to use | o/n             | 4°C         | -                  | -           | -               | -             | BO                | Citrate BS                             | 95°C        | 40m             |
|       |                                   | 10%Fo            | 3~5d                           | P         | Ready to use | o/n             | 4°C         | -                  | -           | -               | -             | PC                | Serotec Target Unmasking Fluid Mark2   | -           | 10m             |
|       |                                   | 10%Fo            | A few days (clinical specimen) | P         | Ready to use | o/n             | 4°C         | -                  | -           | -               | -             | AC                | Target Retrieval Solution ( Dako)      | 121°C       | 20m             |
|       |                                   | 10%Fo            | 1y                             | P         | Ready to use | 60m             | RT          | Proteinase         | 37°C        | 2m              | Ready to use  | -                 | -                                      | -           | -               |
|       |                                   | 10%Fo            | 3d                             | P         | Ready to use | o/n             | 4°C         | -                  | -           | -               | -             | MW                | Citrate BS                             | 97°C        | 20m             |
|       |                                   | 10%Fo            | 24h                            | P         | Ready to use | 40m             | 37°C        | -                  | -           | -               | -             | MW                | Citrate BS                             | 120°C       | 14m             |
|       |                                   | 10%Fo; 4%PFA     | 1d~1w                          | F         | 1/100        | 60m             | RT          | -                  | -           | -               | -             | MW                | Citrate BS (pH6)                       | -           | 6m              |
|       |                                   | 10%Fo            | -                              | P         | Ready to use | 60m             | RT          | -                  | -           | -               | -             | MW                | Citrate BS                             | -           | 10m             |
|       |                                   | 10%Fo            | o/n                            | P         | Ready to use | o/n             | 4°C         | -                  | -           | -               | -             | AC                | Citrate BS (pH6)                       | 121°C       | 15m             |
|       |                                   | 10%Fo            | 24h                            | P         | Ready to use | 40m             | 37°C        | -                  | -           | -               | -             | -                 | -                                      | -           | -               |
| 10%Fo | w                                 | P                | 1/400                          | o/n       | 4°C          | -               | -           | -                  | -           | AC              | Citrate BS    | -                 | 20m                                    |             |                 |
| 10%Fo | -                                 | P                | Ready to use                   | o/n       | 4°C          | -               | -           | -                  | -           | MW              | Citrate BS    | -                 | 15m                                    |             |                 |
| 76    | Cytokeratin Low Molecular Weight  | 10%Fo            | A few days (clinical specimen) | P         | Ready to use | o/n             | 4°C         | Protainase K       | RT          | 10m             | Ready to use  | -                 | -                                      | -           | -               |
| 77    | Cytokeratin High Molecular Weight | 10%Fo            | 3~5d                           | P         | Ready to use | o/n             | 4°C         | Protainase K       | RT          | 3m              | 0.4 mg/mL     | -                 | -                                      | -           | -               |
|       |                                   | 10%Fo            | 24h                            | P         | 5 µg/mL      | o/n             | 4°C         | -                  | -           | -               | -             | MW                | Citrate BS                             | 98°C        | 30m             |
|       |                                   | 10%Fo            | 4w                             | P         | 1/100        | 60m             | RT          | -                  | -           | -               | -             | AC                | Citrate BS                             | 121°C       | 10m             |
| 78    | Cytokeratin 5                     | 10%Fo            | d                              | P         | 1/300        | 30m             | RT          | -                  | -           | -               | -             | MV                | Target Retrieval Solution ( pH6, Dako) | -           | 20m             |
| 79    | Cytokeratin 7                     | 10%Fo            | 24h                            | P         | 1/50~100     | 30m             | RT          | Proteinase K       | 37°C        | 5m              | 0.4 mg/mL     | BO                | -                                      | 100°C       | 20m             |
| 80    | Cytokeratin 8                     | 10%Fo            | o/n                            | P         | 1/20         | 60m; o/n        | RT; 4°C     | -                  | -           | -               | -             | AC                | Citrate BS (pH6)                       | 121°C       | 15m             |
|       |                                   | 10%Fo            | ∞                              | P         | Ready to use | 5h              | RT          | -                  | -           | -               | -             | AC                | BS(pH)                                 | 121°C       | 30m             |
| 81    | Cytokeratin 8/18                  | 10%Fo            | 24h                            | P         | -            | -               | -           | -                  | -           | -               | -             | MW                | Citrate BS                             | 120°C       | 14m             |
|       |                                   | 10%Fo            | -                              | P         | 1/600        | o/n             | 4°C         | -                  | -           | -               | -             | MW                | Citrate BS                             | -           | 10m             |
| 82    | Cytokeratin 10                    | 10%Fo            | 1d~1w                          | P         | 1/400        | 60m             | RT          | -                  | -           | -               | -             | MW                | Immunosaver                            | -           | 3m              |
| 83    | Cytokeratin 13                    | Not Fixed        | -                              | F         | 1/50         | 2h              | RT          | -                  | -           | -               | -             | -                 | -                                      | -           | -               |
| 84    | Cytokeratin 14                    | 10%Fo            | 1y                             | P         | 1/200        | 60m             | RT          | Proteinase         | 37°C        | 2m              | Ready to use  | -                 | -                                      | -           | -               |
|       |                                   | 10%Fo            | ∞                              | P         | 1/50         | 60m             | RT          | -                  | -           | -               | -             | MW                | Citrate BS                             | -           | 10m             |
|       |                                   | 10%Fo            | 1w~                            | P         | 1/75         | 30m             | RT          | -                  | -           | -               | -             | MW                | Citrate BS                             | -           | 10m             |
| 85    | Cytokeratin 18                    | 10%Fo            | 1d~1w                          | P         | 1/100        | 60m             | RT          | -                  | -           | -               | -             | MW                | Citrate BS (pH6)                       | -           | 6m              |
|       |                                   | 10%Fo            | ∞                              | P         | 1/100        | 1.5h            | RT          | -                  | -           | -               | -             | AC                | BS (pH6)                               | 121°C       | 30m             |
|       |                                   | 10%Fo            | o/n                            | P         | 1/100        | 60m; o/n        | RT; 4°C     | -                  | -           | -               | -             | AC                | Citrate BS (pH6)                       | 121°C       | 15m             |

Supplementary Table 6-3 Immunological properties of primary antibodies and IHC staining conditions

| No.      | Antibody                                           | Secondary antibody                           |                                                                                     |                   |                |             |                 | Chromogenic substrate |                 | Photo. No. |
|----------|----------------------------------------------------|----------------------------------------------|-------------------------------------------------------------------------------------|-------------------|----------------|-------------|-----------------|-----------------------|-----------------|------------|
|          |                                                    | Kit product                                  | Product                                                                             | Supplier          | Catalog Number | Temperature | Incubation time | Reagent               | Incubation time |            |
| 67       | Collagen type IV                                   | LSAB                                         | Polyclonal Swine Anti-Rabbit Immunoglobulins/Biotinylated Swine F(ab') <sub>2</sub> | Dako              | E0431          | RT          | 30m             | DAB                   | 5m              |            |
| 68       | Connexin 32                                        | Histofine Simple Stain                       | Histofine® Simple Stain™ Rat MAX PO (MULTI)                                         | Nichirei          | 414191F        | RT          | 30m             | DAB                   | -               |            |
|          |                                                    | Elite ABC                                    | VECTASTAIN Elite ABC Kit (Rabbit IgG)                                               | Vector Labs       | PK-6101        | RT          | 30m             | FITC                  | 30m             |            |
| 69       | CXCR3                                              | Histofine Simple Stain                       | Histofine® Simple Stain™ Rat MAX PO (MULTI)                                         | Nichirei          | 414191F        | RT          | 30m             | DAB                   | 5m              |            |
| 70       | Cyclin D1                                          | Histofine Simple Stain                       | Histofine® Simple Stain™ Rat MAX PO (MULTI)                                         | Nichirei          | 414191         | RT          | 30m             | DAB                   | 30s             |            |
|          |                                                    | Histofine Simple Stain                       | Histofine® Simple Stain™ Rat MAX PO (R)                                             | Nichirei          | 414181         | RT          | 30m             | DAB                   | -               | Photo. 78  |
| 71       | Cyclooxygenase-2                                   | Envision                                     | EnVision™+ Dual Link System-HRP                                                     | Dako              | K4063          | RT          | 30m             | DAB                   | 3m              |            |
|          |                                                    | LSAB                                         | Universal LSAB2 Kit/HRP, Rabbit/Mouse                                               | Dako              | K0675          | RT          | 30m             | DAB                   | 3m              |            |
|          |                                                    | SAB                                          | Histofine® SimpleStain SAB-PO(MULTI)                                                | Nichirei          | 424043         | -           | -               | -                     | -               |            |
|          |                                                    | SAB                                          | Histofine® SimpleStain SAB-PO(MULTI)                                                | Nichirei          | 424043         | -           | -               | -                     | -               |            |
| 72       | Cystatin C                                         | Histofine Simple Stain                       | Histofine® Simple Stain™ Rat MAX PO (R)                                             | Nichirei          | 414181         | RT          | 30m             | DAB                   | 30s             | Photo. 79  |
| 73       | Cytochrome P450 3A1                                | Histofine Simple Stain                       | Histofine® Simple Stain™ Mouse MAX PO (R)                                           | Nichirei          | 414341         | RT          | 30m             | DAB                   | 40s             | Photo. 80  |
| 74       | Cytochrome P450 CYP2B1                             | Histofine Simple Stain                       | Histofine® Simple Stain™ Rat MAX PO (G)                                             | Nichirei          | 414331         | RT          | 30m             | DAB                   | 10m             |            |
| 75       | Cytokeratin                                        | LSAB                                         | Universal LSAB2 Kit/HRP, Rabbit/Mouse                                               | Dako              | K0675          | RT          | 15m             | DAB                   | 5m              |            |
|          |                                                    | LSAB                                         | Universal LSAB2 Kit/HRP, Rabbit/Mouse                                               | Dako              | K0675          | RT          | 15m             | DAB                   | 5m              |            |
|          |                                                    | Envision                                     | EnVision+ System- HRP Labelled Polymer                                              | Dako              | K4000          | 37°C        | 30m             | DAB                   | 2m              |            |
|          |                                                    | Envision                                     | EnVision+ System- HRP Labelled Polymer                                              | Dako              | K4000          | RT          | 30m             | DAB                   | -               |            |
|          |                                                    | Envision                                     | EnVision™+ Dual Link System-HRP                                                     | Dako              | K4063          | RT          | 60m             | DAB                   | 2m              |            |
|          |                                                    | Histofine Simple Stain                       | Histofine® Simple Stain™ Rat MAX PO (MULTI)                                         | Nichirei          | 414191         | RT          | 30m             | DAB                   | 8~10m           |            |
|          |                                                    | Envision+                                    | Envision+ System-HRP Labelled Polymer Anti-mouse                                    | Dako              | K4001          | RT          | 30m             | DAB                   | 3m              |            |
|          |                                                    | Histofine Simple Stain                       | Histofine® Simple Stain™ Rat MAX PO (MULTI)                                         | Nichirei          | 414191         | RT          | 30m             | DAB                   | 30s             | Photo. 81  |
|          |                                                    | LSAB                                         | Universal LSAB2 Kit/HRP, Rabbit/Mouse                                               | Dako              | K0679          | RT          | 30m             | DAB                   | 1m              |            |
|          |                                                    | Envision                                     | EnVision™+ Dual Link System-HRP                                                     | Dako              | K4061          | 37°C        | 30m             | DAB                   | 1~2m            |            |
|          |                                                    | Histofine Simple Stain                       | Histofine® Simple Stain™ Rat MAX-PO ( MULTI )                                       | Nichirei          | 714191         | RT          | 30m             | DAB                   | 10m             | Photo. 82  |
|          |                                                    | Histofine Simple Stain                       | Histofine® Simple Stain™ Rat MAX PO (MULTI)                                         | Nichirei          | 414191F        | RT          | 30m             | DAB                   | 5m              |            |
|          |                                                    | Histofine Simple Stain                       | -                                                                                   | Nichirei          | -              | -           | -               | DAB                   | -               |            |
| Envision | EnVision™+ Dual Link System-HRP                    | Dako                                         | K4061                                                                               | 37°C              | 30m            | DAB         | 1~2m            |                       |                 |            |
| LSAB     | Universal LSAB2 Kit/HRP, Rabbit/Mouse              | Dako                                         | K0675                                                                               | RT                | 15m            | DAB         | 5m              |                       |                 |            |
| Envision | EnVision+ System- HRP Labelled Polymer Anti-Rabbit | Dako                                         | K4002                                                                               | RT                | 30m            | DAB         | -               | Photo. 83             |                 |            |
| 76       | Cytokeratin Low Molecular Weight                   | Envision+                                    | Envision+ System-HRP Labelled Polymer Anti-mouse                                    | Dako              | K4001          | RT          | 30m             | DAB                   | 3m              | Photo. 84  |
| 77       | Cytokeratin High Molecular Weight                  | Histofine Simple Stain                       | Histofine® Simple Stain™ Rat MAX PO (MULTI)                                         | Nichirei          | 414191         | RT          | 30m             | DAB                   | 5m              |            |
|          |                                                    | Envision                                     | EnVision+ System- HRP Labelled Polymer                                              | Dako              | K4000          | RT          | 30m             | DAB                   | -               |            |
|          |                                                    | Histofine Simple Stain                       | Histofine® Simple Stain™ Rat MAX PO (M)                                             | Nichirei          | 414171         | RT          | 30m             | DAB                   | 10m             | Photo. 85  |
| 78       | Cytokeratin 5                                      | Histofine Simple Stain                       | Histofine® Simple Stain™ Rat MAX PO (R)                                             | Nichirei          | 414181         | RT          | 30m             | DAB                   | 10m             | Photo. 86  |
| 79       | Cytokeratin 7                                      | Envision                                     | EnVision™+ Dual Link System-HRP                                                     | Dako              | K4061          | 37°C        | 30m             | DAB                   | 1~2m            |            |
| 80       | Cytokeratin 8                                      | Histofine Simple Stain                       | -                                                                                   | Nichirei          | -              | -           | -               | DAB                   | -               |            |
|          |                                                    | LSAB                                         | Universal LSAB2 Kit/HRP, Rabbit/Mouse                                               | Dako              | K0609          | RT          | 10m             | DAB                   | 90s             | Photo. 87  |
| 81       | Cytokeratin 8/18                                   | Envision                                     | EnVision™+ Dual Link System-HRP                                                     | Dako              | K4061          | 37°C        | 30m             | DAB                   | 1~2m            |            |
|          |                                                    | Anti-guinea pig IgG goat polyclonal antibody | anti-guinea pig IgG goat polyclonal antibody                                        | Dako              | P0141          | RT          | 30m             | DAB                   | 5m              |            |
| 82       | Cytokeratin 10                                     | Histofine Simple Stain                       | Histofine® Mouse stain kit,                                                         | Nichirei          | 714321; 714191 | RT          | 30m             | DAB                   | 10m             | Photo. 88  |
| 83       | Cytokeratin 13                                     | Alexa Fluor                                  | Goat anti Rabbit IgG(H+L) Secondary Antibody, Alexa Fluor® 488 conjugate            | Life Technologies | A-11008        | RT          | 1h              | -                     | -               |            |
| 84       | Cytokeratin 14                                     | Histofine Simple Stain                       | Histofine® Simple Stain™ Rat MAX PO (MULTI)                                         | Nichirei          | 414191         | RT          | 30m             | DAB                   | 30s             | Photo. 89  |
|          |                                                    | Histofine Simple Stain                       | Histofine® Simple Stain™ Rat MAX PO (M)                                             | Nichirei          | 414171         | RT          | 30m             | DAB                   | -               | Photo. 90  |
|          |                                                    | Histofine Simple Stain                       | Histofine® Simple Stain™ MAX-PO(MULTI)                                              | Nichirei          | 424151         | RT          | 30m             | DAB                   | 10m             | Photo. 91  |
| 85       | Cytokeratin 18                                     | Histofine Simple Stain                       | Histofine® Simple Stain™ Rat MAX-PO ( M )                                           | Nichirei          | 724132         | RT          | 30m             | DAB                   | 10m             |            |
|          |                                                    | LSAB                                         | Universal LSAB2 Kit/HRP, Rabbit/Mouse                                               | Dako              | K0609          | RT          | 10m             | DAB                   | 90s             | Photo. 92  |
|          |                                                    | Histofine Simple Stain                       | -                                                                                   | Nichirei          | -              | -           | -               | DAB                   | -               |            |



Supplementary Table 7-2 Immunological properties of primary antibodies and IHC staining conditions

| No.    | Antibody                        | Primary antibody |                                |           |              |                 |             |                    |      |     |              |         |                                        |                                        |          |                     |
|--------|---------------------------------|------------------|--------------------------------|-----------|--------------|-----------------|-------------|--------------------|------|-----|--------------|---------|----------------------------------------|----------------------------------------|----------|---------------------|
|        |                                 | Fixing solution  | Fixing time                    | Embedding | Dilution     | Incubation time | Temperature | Antigen retrieval  |      |     |              |         |                                        |                                        |          |                     |
|        |                                 |                  |                                |           |              |                 |             | Protease treatment |      |     |              | Heating |                                        | Method                                 | Solution | Temperature         |
| Enzyme | Temperature                     | Incubation time  | Concentration                  |           |              |                 |             |                    |      |     |              |         |                                        |                                        |          |                     |
| 86     | Cytokeratin 19                  | 10%Fo            | -                              | P         | Ready to use | o/n             | 4°C         | -                  | -    | -   | -            | -       | PC                                     | Target Retrieval Solution ( pH9, Dako) | 125°C    | 0.5m                |
|        |                                 | 10%Fo            | o/n                            | P         | 1/150        | 60m             | RT          | Trypsin            | 37°C | 10m | -            | -       | -                                      | -                                      | -        | -                   |
|        |                                 | 10%Fo            | 24h                            | P, F      | Ready to use | 60m             | RT          | Trypsin            | 37°C | 20m | -            | -       | -                                      | -                                      | -        | -                   |
|        |                                 | 10%Fo            | o/n                            | P         | 1/1000       | o/n             | 4°C         | -                  | -    | -   | -            | -       | MW                                     | Immunosaver                            | 98°C     | 5~10m               |
|        |                                 | 10%Fo            | 24h                            | P         | 1/50~100     | 30m             | RT          | Proteinase K       | 37°C | 5m  | 0.4 mg/mL    | -       | -                                      | -                                      | -        | -                   |
| 87     | Cytokeratin 20                  | 10%Fo            | 24h                            | P         | -            | -               | -           | -                  | -    | -   | -            | -       | He                                     | CC2 (Roche)                            | 98°C     | 30m                 |
|        |                                 | 10%Fo            | 24h                            | P         | 1/25~50      | 30m             | RT          | Proteinase K       | 37°C | 5m  | 0.4 mg/mL    | -       | -                                      | -                                      | -        |                     |
| 88     | DEAD box Protein 4/DDX-4        | 10%Fo            | -                              | P         | 1/200        | 30m             | RT          | -                  | -    | -   | -            | PC      | Target Retrieval Solution ( pH6, Dako) | 125°C                                  | 0.5m     |                     |
| 89     | Desmin                          | 10%Fo            | 3~5d                           | P         | Ready to use | 60m             | RT          | -                  | -    | -   | -            | -       | -                                      | -                                      | -        |                     |
|        |                                 | 10%Fo            | 24h                            | P         | Ready to use | 40m             | 37°C        | -                  | -    | -   | -            | -       | -                                      | -                                      | -        |                     |
|        |                                 | 10%Fo            | w                              | P         | Ready to use | 60m             | RT          | -                  | -    | -   | -            | -       | -                                      | -                                      | -        |                     |
|        |                                 | 10%Fo            | A few days (clinical specimen) | P         | Ready to use | o/n             | 4°C         | -                  | -    | -   | -            | -       | AC                                     | Target Retrieval Solution ( Dako)      | 121°C    | 20m                 |
|        |                                 | 10%Fo            | 24h                            | P, F      | Ready to use | 60m             | RT          | -                  | -    | -   | -            | -       | MW                                     | Citrate BS                             | 95°C     | 20m                 |
|        |                                 | 10%Fo            | ∞                              | P         | Ready to use | 60m             | RT          | -                  | -    | -   | -            | -       | Bo                                     | BS                                     | -        | 20m                 |
|        |                                 | 10%Fo            | ~1y                            | P         | Ready to use | 60m             | RT          | -                  | -    | -   | -            | -       | MW                                     | Citrate BS                             | -        | 10m                 |
|        |                                 | 10%Fo            | 1w                             | P         | Ready to use | 60m             | RT          | -                  | -    | -   | -            | -       | MW                                     | Target Retrieval Solution ( Dako)      | 500W     | 10m                 |
| 90     | Dityrosine                      | 10%Fo; Bouin     | -                              | P         | 1/200        | o/n             | 4°C         | -                  | -    | -   | -            | -       | ND                                     | -                                      | -        |                     |
|        |                                 | 10%Fo            | 3d                             | P         | 1/50         | o/n             | 4°C         | -                  | -    | -   | -            | -       | -                                      | -                                      |          |                     |
| 91     | <i>Dolichos biflorus</i> Lectin | 10%Fo            | -                              | P         | 1/100        | o/n             | 4°C         | -                  | -    | -   | -            | -       | -                                      | -                                      |          |                     |
| 92     | Doublecortin                    | 10%Fo            | -                              | P         | 1/100        | o/n             | 4°C         | -                  | -    | -   | -            | -       | MW                                     | Citrate BS                             | -        | 15m                 |
| 93     | E-cadherin                      | 10%Fo            | 24h                            | P         | 1/500        | 60m             | RT          | -                  | -    | -   | -            | -       | MW                                     | EDTA                                   | 95°C     | 20m                 |
|        |                                 | 10%Fo            | 24h                            | P         | 1/500        | o/n             | 4°C         | -                  | -    | -   | -            | -       | PC                                     | Citrate BS                             | -        | 10m                 |
|        |                                 | 10%Fo            | o/n                            | P         | 1/50         | o/n             | 4°C         | -                  | -    | -   | -            | -       | MW                                     | BS                                     | -        | 10m                 |
|        |                                 | 10%Fo            | 3d                             | P         | 5 µg/mL      | 60m             | RT          | -                  | -    | -   | -            | -       | PC                                     | Target Retrieval Solution ( Dako)      | 110°C    | 15m                 |
|        |                                 | 10%Fo            | 3d                             | P         | 1/100        | 60m             | RT          | -                  | -    | -   | -            | -       | MW                                     | Target Retrieval Solution ( pH9, Dako) | 500W     | 10m                 |
| 94     | EGF Receptor                    | 10%Fo            | 10m                            | F         | 5 µg/mL      | 60m             | RT          | -                  | -    | -   | -            | -       | -                                      | -                                      |          |                     |
|        |                                 | 10%Fo            | 24h                            | P         | 1/800        | o/n             | 4°C         | -                  | -    | -   | -            | -       | PC                                     | Citrate BS                             | -        | 10m                 |
| 95     | ERCC                            | 10%Fo            | -                              | P         | 1/100        | o/n             | 4°C         | -                  | -    | -   | -            | -       | MW                                     | Citrate BS                             | -        | 15m                 |
|        |                                 | 10%Fo            | ∞                              | P         | 1/200        | 20m             | RT          | -                  | -    | -   | -            | -       | AC                                     | BS (pH6)                               | 121°C    | 15m                 |
| 96     | Estrogen Receptor α             | 10%Fo            | -                              | P         | 1/100        | o/n             | 4°C         | -                  | -    | -   | -            | -       | MW                                     | Citrate BS                             | -        | 15m                 |
|        |                                 | 10%Fo            | -                              | P         | 1/100        | o/n             | 4°C         | -                  | -    | -   | -            | -       | MW                                     | Citrate BS                             | -        | 15m                 |
| 97     | Estrogen Receptor β             | 10%Fo            | 3~7d                           | P         | 1/500        | 60m             | RT          | Proteinase K       | RT   | 5m  | Ready to use | -       | -                                      | -                                      |          |                     |
|        |                                 | 10%Fo            | ∞                              | P         | 1/100        | 60m             | RT          | -                  | -    | -   | -            | -       | Bo                                     | BS                                     | -        | 10m                 |
| 98     | F4/80                           | 10%Fo            | ∞                              | P         | 1/200        | 60m             | RT          | -                  | -    | -   | -            | -       | MW                                     | Citrate BS (pH6)                       | -        | 10m                 |
|        |                                 | 10%Fo            | 1w                             | P         | 1/200        | 60m             | RT          | -                  | -    | -   | -            | -       | MW                                     | Target Retrieval Solution ( Dako)      | 500W     | 10m                 |
|        |                                 | 10%Fo            | -                              | P         | 1/500        | o/n             | 4°C         | -                  | -    | -   | -            | -       | ND                                     | -                                      | -        |                     |
| 99     | Fas                             | MD; Bouin        | -                              | P         | 1/500        | o/n             | 4°C         | -                  | -    | -   | -            | -       | ND                                     | -                                      |          |                     |
| 100    | Fas Ligand                      | MD; Bouin        | -                              | P         | 1/500        | o/n             | 4°C         | -                  | -    | -   | -            | -       | ND                                     | -                                      |          |                     |
| 101    | Fibronectin                     | 10%Fo            | 5m                             | P         | 1/200        | 60m             | RT          | -                  | -    | -   | -            | -       | -                                      | -                                      |          |                     |
| 102    | Follicle Stimulating Hormone    | 10%Fo            | 7d                             | P         | 1/5000       | o/n             | 4°C         | Trypsin            | 37°C | 30m | -            | -       | -                                      | -                                      |          |                     |
|        |                                 | 10%Fo            | -                              | P         | 1/1000       | 30m             | 4°C         | -                  | -    | -   | -            | -       | ND                                     | -                                      |          |                     |
|        |                                 | 10%Fo            | -                              | P         | 1/4000       | o/n             | 4°C         | -                  | -    | -   | -            | -       | -                                      | -                                      |          |                     |
| 103    | Foxp3                           | 10%Fo            | -                              | P         | 1/800        | o/n             | 4°C         | -                  | -    | -   | -            | -       | MW                                     | HistoVT One                            | -        | 15m                 |
|        |                                 | 10%Fo            | -                              | P         | 1/800        | o/n             | 4°C         | -                  | -    | -   | -            | -       | MW                                     | HistoVT One                            | -        | 15m                 |
| 104    | GADD 153                        | 10%Fo            | o/n                            | P         | 1/500        | o/n             | 4°C         | -                  | -    | -   | -            | -       | MV                                     | Target Retrieval Solution ( pH6, Dako) | -        | 10m (After boiling) |
| 105    | Galectin-1                      | 4%PFA            | o/n                            | F         | 1/30         | o/n             | 4°C         | -                  | -    | -   | -            | -       | -                                      | -                                      |          |                     |

Supplementary Table 7-3 Immunological properties of primary antibodies and IHC staining conditions

| No. | Antibody                        | Secondary antibody               |                                                                                                             |                   |                |             |                 | Chromogenic substrate |                 | Photo. No. |
|-----|---------------------------------|----------------------------------|-------------------------------------------------------------------------------------------------------------|-------------------|----------------|-------------|-----------------|-----------------------|-----------------|------------|
|     |                                 | Kit product                      | Product                                                                                                     | Supplier          | Catalog Number | Temperature | Incubation time | Reagent               | Incubation time |            |
| 86  | Cytokeratin 19                  | Histofine Simple Stain           | Histofine® Simple Stain™ MAX-PO(M)                                                                          | Nichirei          | 424131         | RT          | 30m             | DAB                   | 5m              |            |
|     |                                 | Histofine Simple Stain           | -                                                                                                           | Nichirei          | -              | -           | -               | DAB                   | -               |            |
|     |                                 | Histofine Simple Stain           | Histofine® Simple Stain™ Rat MAX-PO ( M )                                                                   | Nichirei          | 714171         | RT          | 30m             | DAB                   | 10m             |            |
|     |                                 | Histofine Simple Stain           | Histofine® Simple Stain™ Mouse MAX PO (R)                                                                   | Nichirei          | 414341         | RT          | 30m             | DAB                   | 30s             | Photo. 93  |
|     |                                 | Envision                         | EnVision™+ Dual Link System-HRP                                                                             | Dako              | K4061          | 37°C        | 30m             | DAB                   | 1~2m            |            |
| 87  | Cytokeratin 20                  | Histofine Simple Stain           | Histofine® Simple Stain™ Rat MAX PO (MULTI)                                                                 | Nichirei          | 414191         | RT          | 30m             | DAB                   | 8m              | Photo. 94  |
|     |                                 | Envision                         | EnVision™+ Dual Link System-HRP                                                                             | Dako              | K4061          | 37°C        | 30m             | DAB                   | 1~2m            |            |
| 88  | DEAD box Protein 4/DDX-4        | Histofine Simple Stain           | Histofine® Simple Stain™ Rat MAX PO (R)                                                                     | Nichirei          | 414181         | RT          | 30m             | DAB                   | 4m              |            |
| 89  | Desmin                          | Histofine Simple Stain           | Histofine® Simple Stain™ Rat MAX PO (MULTI)                                                                 | Nichirei          | 414191         | RT          | 30m             | DAB                   | 5m              |            |
|     |                                 | Envision                         | EnVision™+ Dual Link System-HRP                                                                             | Dako              | K4061          | 37°C        | 30m             | DAB                   | 1~2m            |            |
|     |                                 | Histofine Simple Stain           | Histofine® Simple Stain™ Rat MAX PO (MULTI)                                                                 | Nichirei          | 414191         | RT          | 30m             | DAB                   | 10m             |            |
|     |                                 | Envision+                        | Envision+ System-HRP Labelled Polymer Anti-mouse                                                            | Dako              | K4001          | RT          | 30m             | DAB                   | 3m              |            |
|     |                                 | Histofine Simple Stain           | Histofine® Simple Stain™ Rat MAX-PO ( M )                                                                   | Nichirei          | 714171         | RT          | 30m             | DAB                   | 10m             |            |
|     |                                 | Histofine Simple Stain           | Histofine® Simple Stain™ Rat MAX PO (MULTI)                                                                 | Nichirei          | 414191         | RT          | 30m             | DAB                   | 30s             | Photo. 95  |
|     |                                 | Histofine Simple Stain           | Histofine® Simple Stain™ Rat MAX PO (MULTI)                                                                 | Nichirei          | 414191         | RT          | 30m             | DAB                   | 13m             |            |
|     |                                 | Envision                         | EnVision+ System- HRP Labelled Polymer                                                                      | Dako              | K4000          | RT          | 30m             | DAB                   | 5m              |            |
| 90  | Dityrosine                      | Envision                         | EnVision™+ Dual Link System-HRP                                                                             | Dako              | K4061          | 37°C        | 30m             | DAB                   | 1~2m            |            |
|     |                                 | Envision, Histofine Simple Stain | EnVision+ System- HRP Labelled Polymer Anti-Rabbit; Histofine® Simple Stain™ Rat MAX PO (MULTI)PO ( MULTI ) | Dako, Nichirei    | K4002; 414191  | RT          | 30m             | DAB                   | 1m30s           | Photo. 96  |
| 91  | <i>Dolichos biflorus</i> Lectin | Histofine Simple Stain           | Histofine® Simple Stain™ Rat MAX PO (MULTI)                                                                 | Nichirei          | 414191F        | -           | -               | -                     | -               |            |
| 92  | Doublecortin                    | -                                | -                                                                                                           | -                 | -              | -           | -               | DAB                   | 1m30s           |            |
| 93  | E-cadherin                      | Histofine Simple Stain           | Histofine® SAB-PO(G)KIT                                                                                     | Nichirei          | 414011         | RT          | 10m; 5m         | DAB                   | -               | Photo. 97  |
|     |                                 | Histofine Simple Stain           | Histofine® Simple Stain™ Rat MAX-PO ( M )                                                                   | Nichirei          | 714171         | RT          | 30m             | DAB                   | 10m             |            |
|     |                                 | Histofine Simple Stain           | Histofine® Simple Stain™ Rat MAX PO (M)                                                                     | Nichirei          | 414171         | RT          | 60m             | DAB                   | -               | Photo. 98  |
|     |                                 | Elite ABC                        | VECTASTAIN Elite ABC Kit (Mouse IgG)                                                                        | Vector Labs       | PK-6102        | RT          | 30m             | DAB                   | 1m              |            |
|     |                                 | Envision                         | EnVision+ System- HRP Labelled Polymer                                                                      | Dako              | K4000          | RT          | 30m             | DAB                   | 5m              | Photo. 99  |
| 94  | EGF Receptor                    | Histofine Simple Stain           | Histofine® Simple Stain™ Mouse MAX PO (R)                                                                   | Nichirei          | 414341         | RT          | 30m             | DAB                   | 5m              | Photo. 100 |
|     |                                 | Envision                         | EnVision+ System- HRP Labelled Polymer                                                                      | Dako              | K4000          | RT          | 30m             | DAB                   | 2m              |            |
| 95  | ERCC                            | Histofine Simple Stain           | Histofine® Simple Stain™ Rat MAX PO (M)                                                                     | Nichirei          | 414171         | RT          | 60m             | DAB                   | -               | Photo. 101 |
| 96  | Estrogen Receptor α             | SAB                              | Histofine® SimpleStain SAB-PO(MULTI)                                                                        | Nichirei          | 424043         | -           | -               | -                     | -               |            |
|     |                                 | Histofine Simple Stain           | Histofine® SAB-PO(R)                                                                                        | Nichirei          | 426041         | RT          | 10m             | DAB                   | 60s             | Photo. 102 |
| 97  | Estrogen Receptor β             | SAB                              | Histofine® SimpleStain SAB-PO(MULTI)                                                                        | Nichirei          | 424043         | -           | -               | -                     | -               |            |
|     |                                 | SAB                              | Histofine® SimpleStain SAB-PO(MULTI)                                                                        | Nichirei          | 424043         | -           | -               | -                     | -               |            |
|     |                                 | LSAB                             | Biotinylated Rabbit Anti-Rat Immunoglobulins                                                                | Dako              | E0468          | RT          | 30m             | DAB                   | 5m              |            |
| 98  | F4/80                           | Histofine Simple Stain           | -                                                                                                           | Nichirei          | -              | RT          | 30m             | DAB                   | 30s             | Photo. 103 |
|     |                                 | Histofine Simple Stain           | Histofine® Simple Stain™ Mouse MAX PO (Rat)                                                                 | Nichirei          | 414311         | RT          | 30m             | -                     | 5m              |            |
|     |                                 | Biotinylated immunoglobulin      | Biotinylated Rabbit Anti-Rat Immunoglobulins                                                                | Dako              | E0468          | RT          | 30m             | DAB                   | 5m              | Photo. 104 |
|     |                                 | Histofine Simple Stain           | Histofine® Simple Stain™ Rat MAX PO (MULTI)                                                                 | Nichirei          | 414191F        | -           | -               | -                     | -               |            |
| 99  | Fas                             | Histofine Simple Stain           | Histofine® Simple Stain™ Rat MAX PO (MULTI)                                                                 | Nichirei          | 414191F        | -           | -               | -                     | -               |            |
| 100 | Fas Ligand                      | Histofine Simple Stain           | Histofine® Simple Stain™ Rat MAX PO (MULTI)                                                                 | Nichirei          | 414191F        | -           | -               | -                     | -               |            |
| 101 | Fibronectin                     | Histofine Simple Stain           | Histofine® Simple Stain™ Rat MAX PO (MULTI)                                                                 | Nichirei          | 414191         | -           | -               | -                     | -               |            |
| 102 | Follicle Stimulating Hormone    | Envision                         | EnVision+ System- HRP Labelled Polymer Anti-Rabbit                                                          | Dako              | K4002          | RT          | 30m             | DAB                   | 4m              | Photo. 105 |
|     |                                 | -                                | -                                                                                                           | -                 | -              | -           | -               | -                     | -               |            |
| 103 | Foxp3                           | Histofine Simple Stain           | Histofine® Simple Stain™ Rat MAX PO (R)                                                                     | Nichirei          | 414181         | RT          | 60m             | DAB                   | -               |            |
|     |                                 | Histofine Simple Stain           | Histofine® Simple Stain™ Rat MAX PO (R)                                                                     | Nichirei          | 414181F        | RT          | 30m             | DAB                   | 5m              |            |
|     |                                 | Histofine Simple Stain           | Histofine® Simple Stain™ Rat MAX PO (R)                                                                     | Nichirei          | 414181F        | -           | -               | -                     | -               |            |
| 104 | GADD 153                        | Histofine Simple Stain           | Histofine® Simple Stain™ Mouse MAX PO (R)                                                                   | Nichirei          | 414341         | RT          | 20m             | DAB                   | 10m             | Photo. 106 |
| 105 | Galectin-1                      | Alexa Fluor                      | Donkey anti-Goat IgG (H+L) Secondary Antibody, Alexa Fluor® 488 conjugate                                   | Life Technologies | A-11055        | RT          | 30m             | -                     | -               |            |



Supplementary Table 8-2 Immunological properties of primary antibodies and IHC staining conditions

| No.   | Antibody                                 | Primary antibody |                                |           |              |                 |             |                    |              |                 |               |                   |            |                                       |             |                 |   |
|-------|------------------------------------------|------------------|--------------------------------|-----------|--------------|-----------------|-------------|--------------------|--------------|-----------------|---------------|-------------------|------------|---------------------------------------|-------------|-----------------|---|
|       |                                          | Fixing solution  | Fixing time                    | Embedding | Dilution     | Incubation time | Temperature | Protease treatment |              |                 |               | Antigen retrieval |            |                                       |             |                 |   |
|       |                                          |                  |                                |           |              |                 |             | Enzyme             | Temperature  | Incubation time | Concentration | Method            | Heating    |                                       | Temperature | Incubation time |   |
| 106   | Glial Fibrillary Acidic Protein          | 10%Fo            | 3d                             | P         | 1/100        | o/n             | 4°C         | -                  | -            | -               | -             | -                 | -          | -                                     | -           | -               | - |
|       |                                          | 10%Fo            | 1y                             | P         | 1/50         | 60m             | RT          | -                  | -            | -               | -             | -                 | Bo         | Citrate BS                            | 95~99°C     | 20m             |   |
|       |                                          | 10%Fo; FG        | 1d~1w; 1d                      | P         | 1/50~1/100   | 60m             | RT          | -                  | -            | -               | -             | -                 | MW         | Citrate BS (pH6), Immunosaver         | -           | 6m; 3m          |   |
|       |                                          | 10%Fo            | 24h                            | P, F      | 1/2500       | 60m             | RT          | -                  | -            | -               | -             | -                 | MW         | Citrate BS                            | 95°C        | 20m             |   |
|       |                                          | 10%Fo            | 1w                             | P         | 1/1000       | 60m             | RT          | -                  | -            | -               | -             | -                 | MW         | Citrate BS                            | 98°C        | 15m             |   |
|       |                                          | 10%Fo            | ∞                              | P         | Ready to use | o/n             | 4°C         | -                  | -            | -               | -             | -                 | AC         | Citrate BS                            | 121°C       | 5m              |   |
|       |                                          | 10%Fo            | 3~5d                           | P         | Ready to use | 30m             | RT          | -                  | -            | -               | -             | -                 | -          | -                                     | -           | -               |   |
|       |                                          | 10%Fo            | o/n                            | P         | Ready to use | 60m             | RT          | -                  | -            | -               | -             | -                 | AC         | Citrate BS (pH6)                      | 121°C       | 15m             |   |
|       |                                          | 10%Fo            | 24h                            | P         | Ready to use | 40m             | 37°C        | -                  | -            | -               | -             | -                 | -          | -                                     | -           | -               |   |
|       |                                          | 10%Fo            | A few days (clinical specimen) | P         | Ready to use | o/n             | 4°C         | -                  | -            | -               | -             | -                 | AC         | Target Retrieval Solution (Dako)      | 121°C       | 20m             |   |
| 10%Fo | o/n                                      | P                | Ready to use                   | o/n       | 4°C          | -               | -           | -                  | -            | -               | PC            | Citrate BS        | -          | 10m                                   |             |                 |   |
| 10%Fo | 1d                                       | P                | Ready to use                   | o/n       | 4°C          | -               | -           | -                  | -            | -               | MW            | Immunosaver       | 98°C       | 10m                                   |             |                 |   |
| 10%Fo | w                                        | P                | 1/500                          | o/n       | 4°C          | -               | -           | -                  | -            | -               | AC            | Citrate BS        | -          | 20m                                   |             |                 |   |
| 107   | α2μ-globulin                             | 10%Fo            | o/n                            | P         | 1/100        | o/n             | 4°C         | Trypsin            | 37°C         | 30m             | -             | -                 | -          | -                                     | -           | -               |   |
|       |                                          | 10%Fo            | -                              | P         | 1/2000       | o/n             | 4°C         | 0.05% Protease     | RT           | 10m             | 0.05%         | -                 | -          | -                                     | -           | -               |   |
|       |                                          | 10%Fo            | 4w                             | P         | 1/200~300    | 2h; o/n         | RT; 4°C     | -                  | -            | -               | -             | -                 | MW         | Citrate BS                            | -           | 20m             |   |
|       |                                          | 10%Fo            | ∞                              | P         | 1/100        | 60m             | RT          | -                  | -            | -               | -             | -                 | Bo         | BS                                    | -           | 20m             |   |
|       |                                          | 10%Fo            | 1d~1w                          | P         | 1/100        | 60m             | RT          | -                  | -            | -               | -             | -                 | -          | -                                     | -           | -               |   |
|       |                                          | 10%Fo            | 2w                             | P         | 1/600        | o/n             | 4°C         | Proteinase         | 37°C         | 15m             | -             | -                 | Bo         | Tris-EDTA (pH9)                       | About 85°C  | 40m             |   |
| 10%Fo | 1w                                       | P                | 1/300                          | 60m       | 37°C         | Protenase1      | 37°C        | 15m                | Ready to use | He              | CC2 (Roche)   | 98°C              | 30m        |                                       |             |                 |   |
| 10%Fo | ∞                                        | P                | 1/100                          | o/n       | 4°C          | -               | -           | -                  | -            | -               | MW            | Citrate BS        | -          | 10m                                   |             |                 |   |
| 108   | Glucagon                                 | Bouin            | ~1or2d                         | P         | 1/1000       | o/n             | 4°C         | -                  | -            | -               | -             | -                 | -          | -                                     | -           | -               |   |
|       |                                          | 10%Fo            | o/n                            | P         | 1/4000       | o/n             | 4°C         | -                  | -            | -               | -             | -                 | -          | -                                     | -           | -               |   |
|       |                                          | 10%Fo            | -                              | P         | 1/5000       | o/n             | 4°C         | -                  | -            | -               | -             | -                 | -          | -                                     | -           | -               |   |
|       |                                          | 10%Fo            | -                              | P         | 1/12000      | o/n             | 4°C         | -                  | -            | -               | -             | -                 | PC         | Target Retrieval Solution (pH6, Dako) | 125°C       | 0.5m            |   |
|       |                                          | 10%Fo            | o/n                            | P         | Ready to use | 9m              | 40°C        | -                  | -            | -               | -             | -                 | -          | -                                     | -           | -               |   |
| 109   | Glucose Transporter type 1               | 10%Fo            | o/n                            | P         | 1/250        | o/n             | 4°C         | -                  | -            | -               | -             | PC                | Citrate BS | -                                     | 10m         |                 |   |
| 110   | Glucose Transporter type 3               | 10%Fo            | o/n                            | P         | 1/100        | o/n             | 4°C         | -                  | -            | -               | -             | PC                | Citrate BS | -                                     | 10m         |                 |   |
| 111   | Glutamate Decarboxylase 65&67            | 10%Fo            | 3~5d                           | P         | 1/50         | o/n             | 4°C         | -                  | -            | -               | -             | -                 | -          | -                                     | -           |                 |   |
| 112   | Glutamine Synthetase                     | MD               | -                              | P         | 1/200        | o/n             | 4°C         | Proteinase K       | RT           | 10m             | -             | -                 | -          | -                                     | -           |                 |   |
| 113   | Glutathione S-transferase Placental type | Cold acetone     | o/n                            | P         | 1/2000       | o/n             | 4°C         | -                  | -            | -               | -             | -                 | -          | -                                     | -           | -               |   |
|       |                                          | 10%Fo            | 3~7d                           | P         | 1/1000       | 60m             | RT          | -                  | -            | -               | -             | -                 | -          | -                                     | -           | -               |   |
|       |                                          | 10%Fo            | 1 y                            | P         | 1/200        | 30m             | RT          | -                  | -            | -               | -             | -                 | -          | -                                     | -           | -               |   |
|       |                                          | 10%Fo            | -                              | P         | 1/1000       | o/n             | 4°C         | -                  | -            | -               | -             | -                 | ND         | -                                     | -           | -               |   |
|       |                                          | 10%Fo            | 7d                             | P         | 1/1000       | 60m             | RT          | -                  | -            | -               | -             | -                 | -          | -                                     | -           | -               |   |
|       |                                          | 10%Fo            | 7d                             | P         | 1/1000       | 60m             | RT          | -                  | -            | -               | -             | -                 | -          | -                                     | -           | -               |   |
|       |                                          | 10%Fo            | 1w                             | P         | 1/1000       | 60m             | RT          | -                  | -            | -               | -             | -                 | -          | -                                     | -           | -               |   |
|       |                                          | 10%Fo            | -                              | P         | Ready to use | o/n             | 4°C         | -                  | -            | -               | -             | -                 | -          | -                                     | -           | -               |   |
|       |                                          | 10%Fo            | 2w                             | P         | Ready to use | 60m             | RT          | -                  | -            | -               | -             | -                 | -          | -                                     | -           | -               |   |
|       |                                          | 10%Fo            | ∞                              | P         | 1/2          | 30m             | RT          | -                  | -            | -               | -             | -                 | -          | -                                     | -           | -               |   |
| 10%Fo | 1d                                       | P                | Ready to use                   | 60m       | RT           | -               | -           | -                  | -            | -               | -             | -                 | -          | -                                     |             |                 |   |
| 114   | Glutathione S-transferase π              | 10%Fo            | 3d                             | P         | 1/500        | o/n             | 4°C         | -                  | -            | -               | -             | -                 | -          | -                                     | -           | -               |   |
|       |                                          | 10%Fo            | ∞                              | P         | 1/500        | 60m             | RT          | -                  | -            | -               | -             | -                 | MW         | Citrate BS (pH6)                      | -           | 10m             |   |
| 115   | Granzyme B                               | 10%Fo            | -                              | P         | 1/100        | o/n             | 4°C         | -                  | -            | -               | -             | -                 | MW         | HistoVT One                           | -           | 15m             |   |
| 116   | Green Fluorescent Protein                | 10%Fo            | -                              | P         | 1/7000       | o/n             | 4°C         | -                  | -            | -               | -             | -                 | -          | -                                     | -           | -               |   |
| 117   | Growth Hormone                           | 10%Fo            | 7d                             | P         | 1/1000       | o/n             | 4°C         | Trypsin            | 37°C         | 30m             | -             | -                 | -          | -                                     | -           | -               |   |
|       |                                          | 10%Fo            | -                              | P         | 1/500        | 30m             | 4°C         | -                  | -            | -               | -             | -                 | ND         | -                                     | -           | -               |   |
|       |                                          | 10%Fo            | ~1y                            | P         | 1/250        | 2h              | 37°C        | -                  | -            | -               | -             | -                 | -          | -                                     | -           | -               |   |
|       |                                          | 10%Fo            | -                              | P         | 1/200        | o/n             | 4°C         | -                  | -            | -               | -             | -                 | ND         | -                                     | -           | -               |   |

Supplementary Table 8-3 Immunological properties of primary antibodies and IHC staining conditions

| No.                         | Antibody                                                 | Secondary antibody     |                                                                                               |                   |                |             |                 | Chromogenic substrate |                 | Photo. No. |
|-----------------------------|----------------------------------------------------------|------------------------|-----------------------------------------------------------------------------------------------|-------------------|----------------|-------------|-----------------|-----------------------|-----------------|------------|
|                             |                                                          | Kit product            | Product                                                                                       | Supplier          | Catalog Number | Temperature | Incubation time | Reagent               | Incubation time |            |
| 106                         | Glial Fibrillary Acidic Protein                          | LSAB                   | Universal LSAB2 Kit/HRP, Rabbit/Mouse                                                         | Dako              | K0679          | RT          | 30m             | DAB                   | 1~2m            |            |
|                             |                                                          | Envision               | EnVision+ System- HRP Labelled Polymer                                                        | Dako              | K1390          | RT          | 1h              | DAB                   | 5m              |            |
|                             |                                                          | Histofine Simple Stain | Histofine® Simple Stain™ Rat MAX-PO ( MULTI )                                                 | Nichirei          | 714191         | RT          | 30m             | DAB                   | 10m             | Photo. 107 |
|                             |                                                          | Histofine Simple Stain | Histofine® Simple Stain™ Rat MAX-PO ( R )                                                     | Nichirei          | 714181         | RT          | 30m             | DAB                   | 10m             |            |
|                             |                                                          | Alexa Fluor            | F(ab') <sub>2</sub> -Goat anti-Mouse IgG (H+L) Secondary Antibody, Alexa Fluor® 488 conjugate | Life Technologies | A-11017        | RT          | 30m             | -                     | -               |            |
|                             |                                                          | Envision               | EnVision+ System- HRP Labelled Polymer Anti-Rabbit                                            | Dako              | K4002          | 37°C        | 30m             | DAB                   | 2m              | Photo. 108 |
|                             |                                                          | Histofine Simple Stain | Histofine® Simple Stain™ Rat MAX PO (MULTI)                                                   | Nichirei          | 414191         | RT          | 30m             | DAB                   | 5m              |            |
|                             |                                                          | -                      | -                                                                                             | -                 | -              | -           | -               | DAB                   | -               |            |
|                             |                                                          | Envision               | EnVision™+ Dual Link System-HRP                                                               | Dako              | K4061          | 37°C        | 30m             | DAB                   | 1~2m            |            |
|                             |                                                          | Envision+              | Envision+ System-HRP Labelled Polymer Anti-Rabbit                                             | Dako              | K4003          | RT          | 30m             | DAB                   | 3m              |            |
|                             |                                                          | Histofine Simple Stain | Histofine® Simple Stain™ Rat MAX PO (MULTI)                                                   | Nichirei          | 414191         | RT          | 30m             | DAB                   | -               |            |
|                             |                                                          | Histofine Simple Stain | Histofine® Simple Stain™ Mouse MAX PO (R)                                                     | Nichirei          | 414341         | RT          | 30m             | DAB                   | 60s             |            |
| LSAB                        | Universal LSAB2 Kit/HRP, Rabbit/Mouse                    | Dako                   | K0675                                                                                         | RT                | 15m            | DAB         | 5m              |                       |                 |            |
| 107                         | α2μ-globulin                                             | Envision               | EnVision+ System- HRP Labelled Polymer                                                        | Dako              | K4000          | RT          | 30m             | DAB                   | 3m              | Photo. 109 |
|                             |                                                          | Histofine Simple Stain | Histofine® SAB-PO(G)KIT                                                                       | Nichirei          | 414011         | RT          | 5m; 10m         | DAB                   | -               |            |
|                             |                                                          | Histofine Simple Stain | Histofine® Simple Stain™ Rat MAX-PO ( G )                                                     | Nichirei          | 714331         | RT          | 30m             | DAB                   | 1~5m            |            |
|                             |                                                          | Histofine Simple Stain | Histofine® Simple Stain™ Rat MAX PO (G)                                                       | Nichirei          | 414331         | RT          | 30m             | DAB                   | 30s             | Photo. 110 |
|                             |                                                          | Histofine Simple Stain | Histofine® Simple Stain™ Rat MAX PO (G)                                                       | Nichirei          | 414331         | RT          | 30m             | DAB                   | 10m             |            |
|                             |                                                          | Histofine Simple Stain | Histofine® Simple Stain™ Rat MAX PO (G)                                                       | Nichirei          | 414331         | RT          | 1h              | DAB                   | 2m              |            |
|                             |                                                          | Histofine Simple Stain | Histofine® Simple Stain™ Rat MAX PO (G)                                                       | Nichirei          | 414331         | RT          | 30m             | DAB                   | 8m              |            |
| Biotinylated immunoglobulin | Polyclonal Rabbit Anti-Goat Immunoglobulins/Biotinylated | Dako                   | E0466                                                                                         | 37°C              | 30m            | DAB         | 2m              |                       |                 |            |
| 108                         | Glucagon                                                 | Histofine Simple Stain | Histofine® Simple Stain™ Rat MAX PO (MULTI)                                                   | Nichirei          | 414191         | RT          | -               | DAB                   | ~1m             | Photo. 111 |
|                             |                                                          | -                      | -                                                                                             | -                 | -              | -           | -               | DAB                   | -               |            |
|                             |                                                          | Envision               | EnVision+ System- HRP Labelled Polymer                                                        | Dako              | K4000          | RT          | 30m             | DAB                   | -               | Photo. 112 |
|                             |                                                          | Histofine Simple Stain | Histofine® Simple Stain™ MAX-PO(M)                                                            | Nichirei          | 424131         | RT          | 30m             | DAB                   | 10~20s          |            |
| Histofine Simple Stain      | Histofine® Simple Stain™ Mouse MAX PO (R)                | Nichirei               | 414341                                                                                        | 40°C              | 4m             | DAB         | 10m             | Photo. 113            |                 |            |
| 109                         | Glucose Transporter type 1                               | Elite ABC              | VECTASTAIN Elite ABC Kit (Rabbit IgG)                                                         | Vector Labs       | PK-6101        | RT          | 30m             | DAB                   | 1m20s           | Photo. 114 |
| 110                         | Glucose Transporter type 3                               | Elite ABC              | VECTASTAIN Elite ABC Kit (Rabbit IgG)                                                         | Vector Labs       | PK-6101        | RT          | 30m             | DAB                   | 1m10s           | Photo. 115 |
| 111                         | Glutamate Decarboxylase 65&67                            | Histofine Simple Stain | Histofine® Simple Stain™ Rat MAX PO (MULTI)                                                   | Nichirei          | 414191         | RT          | 30m             | DAB                   | 5m              |            |
| 112                         | Glutamine Synthetase                                     | Histofine Simple Stain | Histofine® Simple Stain™ Rat MAX PO (MULTI)                                                   | Nichirei          | 414191         | RT          | 30m             | DAB                   | 1~2m            | Photo. 116 |
| 113                         | Glutathione S-transferase Placental type                 | Envision               | EnVision+ System- HRP Labelled Polymer Anti-Rabbit                                            | Dako              | K4002          | 37°C        | 30m             | DAB                   | 2m              | Photo. 117 |
|                             |                                                          | LSAB                   | Polyclonal Swine Anti-Rabbit Immunoglobulins/Biotinylated Swine F(ab') <sub>2</sub>           | Dako              | E0431          | RT          | 30m             | DAB                   | 5m              |            |
|                             |                                                          | Histofine Simple Stain | Histofine® Simple Stain™ Rat MAX-PO ( MULTI )                                                 | Nichirei          | 714191         | RT          | 30m             | DAB                   | 1~5m            |            |
|                             |                                                          | Histofine Simple Stain | Histofine® Simple Stain™ Rat MAX PO (MULTI)                                                   | Nichirei          | 414191F        | RT          | 30m             | DAB                   | 1m30s           |            |
|                             |                                                          | LSAB                   | Universal LSAB2 Kit/HRP, Rabbit/Mouse                                                         | Dako              | K0609          | RT          | 10m             | DAB                   | 3m              |            |
|                             |                                                          | LSAB                   | Universal LSAB2 Kit/HRP, Rabbit/Mouse                                                         | Dako              | K0609          | RT          | 10m             | DAB                   | 7m              |            |
|                             |                                                          | Histofine Simple Stain | Histofine® Simple Stain™ Rat MAX PO (MULTI)                                                   | Nichirei          | 414191         | RT          | 30m             | DAB                   | 8m              |            |
|                             |                                                          | Histofine Simple Stain | Histofine® Simple Stain™ Rat MAX PO (R)                                                       | Nichirei          | 414181         | RT          | 30m             | DAB                   | -               |            |
|                             |                                                          | Histofine Simple Stain | Histofine® Simple Stain™ Rat MAX PO (MULTI)                                                   | Nichirei          | 414191         | RT          | 30m             | DAB                   | 30s             |            |
|                             |                                                          | Histofine Simple Stain | Histofine® Simple Stain™ Rat MAX PO (R)                                                       | Nichirei          | 414181         | RT          | 30m             | DAB                   | 4m              |            |
| LSAB                        | -                                                        | Dako                   | -                                                                                             | RT                | 30m            | DAB         | 1m              |                       |                 |            |
| 114                         | Glutathione S-transferase π                              | LSAB                   | Universal LSAB2 Kit/HRP, Rabbit/Mouse                                                         | Dako              | K0679          | RT          | 30m             | DAB                   | 1m30s           |            |
|                             |                                                          | Envision               | EnVision+ System- HRP Labelled Polymer Anti-Rabbit                                            | Dako              | K4002          | RT          | 30m             | -                     | 10m             |            |
| 115                         | Granzyme B                                               | Histofine Simple Stain | Histofine® Simple Stain™ Rat MAX PO (MULTI)                                                   | Nichirei          | 414191F        | RT          | 30m             | DAB                   | 3m              |            |
| 116                         | Green Fluorescent Protein                                | Envision               | EnVision+ System- HRP Labelled Polymer Anti-Rabbit                                            | Dako              | K4002          | RT          | 30m             | DAB                   | -               |            |
| 117                         | Growth Hormone                                           | Envision               | EnVision+ System- HRP Labelled Polymer                                                        | Dako              | K4000          | RT          | 30m             | DAB                   | 4m              | Photo. 118 |
|                             |                                                          | -                      | -                                                                                             | -                 | -              | -           | -               | -                     | -               |            |
|                             |                                                          | LSAB                   | Universal LSAB2 Kit/HRP, Rabbit/Mouse                                                         | Dako              | K0675          | 37°C        | 10m             | DAB                   | 2m30s           | Photo. 119 |
| Histofine Simple Stain      | Histofine® Simple Stain™ Rat MAX PO (G)                  | Nichirei               | 414331F                                                                                       | RT                | 30m            | DAB         | 3m              |                       |                 |            |





Supplementary Table 9-2 Immunological properties of primary antibodies and IHC staining conditions

| No.          | Antibody                                | Primary antibody |                                |           |              |                 |             |                    |             |                 |                  |                   |                                            |       |             |
|--------------|-----------------------------------------|------------------|--------------------------------|-----------|--------------|-----------------|-------------|--------------------|-------------|-----------------|------------------|-------------------|--------------------------------------------|-------|-------------|
|              |                                         | Fixing solution  | Fixing time                    | Embedding | Dilution     | Incubation time | Temperature | Protease treatment |             |                 |                  | Antigen retrieval |                                            |       |             |
|              |                                         |                  |                                |           |              |                 |             | Enzyme             | Temperature | Incubation time | Concentration    | Method            | Heating                                    |       | Temperature |
| 118          | H <sup>+</sup> , K <sup>+</sup> -ATPase | 10%Fo            | -                              | P         | 1/1000       | o/n             | 4°C         | -                  | -           | -               | -                | AC                | BS                                         | 121°C | 15m         |
| 119          | Heat Shock Protein 60                   | 10%Fo            | -                              | P         | 1/400        | o/n             | 4°C         | -                  | -           | -               | -                | MW                | HistoVT One                                | -     | 15m         |
| 120          | Heme Oxygenase-1                        | 10%Fo            | ∞                              | P         | 1/200        | 30m             | RT          | Proteinase K       | RT          | 5m              | Ready to use     | -                 | -                                          | -     | -           |
| 121          | Hepatocyte                              | 10%Fo            | A few days (clinical specimen) | P         | Ready to use | o/n             | 4°C         | -                  | -           | -               | -                | AC                | Target Retrieval Solution ( Dako)          | 121°C | 20m         |
| 122          | Hexanoyl Lysine (HEL)                   | 10%Fo; Bouin     | -                              | P         | 1/100        | o/n             | 4°C         | -                  | -           | -               | -                | ND                | -                                          | -     | -           |
| 123          | 4-Hydroxy-2-nonenal                     | 10%Fo            | -                              | P         | 1/100        | o/n             | 4°C         | -                  | -           | -               | -                | MW                | HistoVT One                                | -     | 15m         |
|              |                                         | 10%Fo            | >1w                            | P         | 1/50         | o/n             | 4°C         | -                  | -           | -               | -                | AC                | Citrate BS                                 | 121°C | 15m         |
|              |                                         | 10%Fo            | 3d                             | P         | 1/1000       | o/n             | 4°C         | -                  | -           | -               | -                | -                 | -                                          | -     | -           |
| 124          | Iba 1                                   | 10%Fo            | o/n                            | P         | 1/200        | o/n             | 4°C         | -                  | -           | -               | -                | MW                | BS                                         | -     | 10m         |
|              |                                         | 10%Fo            | 4w                             | P         | 1/500        | o/n             | 4°C         | -                  | -           | -               | -                | -                 | -                                          | -     | -           |
|              |                                         | 10%Fo            | ∞                              | P         | 1/250        | o/n             | 4°C         | -                  | -           | -               | -                | AC                | Citrate BS                                 | 121°C | 5m          |
|              |                                         | 10%Fo            | -                              | P         | 1/16000      | o/n             | 4°C         | -                  | -           | -               | -                | PC                | Citrate BS                                 | -     | 20m         |
|              |                                         | 10%Fo            | 1w~                            | P         | 1/200        | 30m             | RT          | Trypsin            | 37°C        | 30m             | -                | -                 | -                                          | -     | -           |
|              |                                         | 10%Fo            | 3d                             | P         | 1/500        | 2h              | RT          | -                  | -           | -               | -                | MW                | Citrate BS                                 | 98°C  | 15m         |
|              |                                         | 10%Fo            | 3~5d                           | P         | 1/500        | 60m             | RT          | -                  | -           | -               | -                | PC                | Citrate BS                                 | -     | 10m         |
|              |                                         | 10%Fo            | 2~3d                           | P         | 1/1000       | 60m             | RT          | -                  | -           | -               | -                | MW                | Instant antigen retrieval H buffer ( pH7 ) | -     | 5m          |
|              |                                         | 10%Fo            | -                              | P         | 1/200        | o/n             | 4°C         | -                  | -           | -               | -                | -                 | -                                          | -     | -           |
|              |                                         | 10%Fo            | o/n                            | P         | 1/2000       | 60m             | RT          | -                  | -           | -               | -                | MW                | Immunosaver (0.5%)                         | 100°C | 15m         |
|              |                                         | 10%Fo            | o/n                            | P         | 1/2000       | o/n             | 4°C         | -                  | -           | -               | -                | AC                | Citrate BS (pH6)                           | 121°C | 15m         |
|              |                                         | 10%Fo            | 24h                            | P         | -            | -               | -           | -                  | -           | -               | -                | -                 | -                                          | -     | -           |
|              |                                         | 10%Fo            | w                              | P         | 1/50         | o/n             | 4°C         | -                  | -           | -               | -                | AC                | Citrate BS                                 | -     | 20m         |
|              |                                         | 10%Fo            | 24h                            | P, F      | 1/1000       | 60m             | RT          | -                  | -           | -               | -                | MW                | Citrate BS                                 | 95°C  | 20m         |
|              |                                         | 10%Fo            | ∞                              | P         | 1/200        | 60m             | RT          | -                  | -           | -               | -                | MW                | Citrate BS (pH6)                           | -     | 10m         |
| 4%PFA        | 1d~1w                                   | P                | 1/1000                         | 60m       | RT           | -               | -           | -                  | -           | MW              | Citrate BS (pH6) | -                 | 6m                                         |       |             |
| 4%PFA        | 24h                                     | P                | 1/1000                         | 60m       | 37°C         | -               | -           | -                  | -           | He              | CC2 (Roche)      | 98°C              | 30m                                        |       |             |
| 10%Fo; 4%PFA | o/n                                     | P, F             | 1/500; 1/400                   | o/n       | 4°C          | -               | -           | -                  | -           | -               | -                | -                 | -                                          |       |             |
| 125          | IFN-γ                                   | 10%Fo            | -                              | P         | 1/200        | o/n             | 4°C         | -                  | -           | -               | -                | MW                | Target Retrieval Solution ( pH9, Dako)     | -     | 15m         |
| 126          | IgG, Fc(γ)                              | 10%Fo            | w                              | P         | 1/500        | 60m             | RT          | -                  | -           | -               | -                | -                 | -                                          | -     |             |
| 127          | IgM, (μ)                                | 10%Fo            | 3~7d                           | P         | 1/200        | 60m             | RT          | Proteinase K       | RT          | 5m              | Ready to use     | -                 | -                                          | -     |             |
|              |                                         | 10%Fo            | w                              | P         | 1/500        | 60m             | RT          | -                  | -           | -               | -                | -                 | -                                          | -     |             |
| 128          | IL-17                                   | 10%Fo            | -                              | P         | 1/200        | o/n             | 4°C         | -                  | -           | -               | -                | MW                | HistoVT One                                | -     | 15m         |
| 129          | Inhibin α                               | 10%Fo            | ∞                              | P         | 1/25         | 30m             | RT          | -                  | -           | -               | -                | PC                | EDTA                                       | -     | -           |
| 130          | Insulin                                 | Bouin            | ~1or2d                         | P         | 1/1000       | o/n             | 4°C         | -                  | -           | -               | -                | -                 | -                                          | -     |             |
|              |                                         | 10%Fo            | o/n                            | P         | 1/1000       | 60m             | RT          | -                  | -           | -               | -                | -                 | -                                          | -     |             |
|              |                                         | 10%Fo            | -                              | P         | 1/5000       | o/n             | 4°C         | -                  | -           | -               | -                | -                 | -                                          | -     |             |
|              |                                         | 10%Fo            | -                              | P         | 1/8000       | o/n             | 4°C         | -                  | -           | -               | -                | PC                | Target Retrieval Solution ( pH6, Dako)     | 125°C | 0.5m        |
|              |                                         | 10%Fo            | -                              | P         | 1/30         | o/n             | 4°C         | -                  | -           | -               | -                | MW                | Citrate BS                                 | -     | 15m         |
|              |                                         | 10%Fo            | 24h                            | P         | Ready to use | 30m             | RT          | -                  | -           | -               | -                | -                 | -                                          | -     | -           |
| 10%Fo        | ~1y                                     | P                | Ready to use                   | 30m       | RT           | -               | -           | -                  | -           | ND              | -                | -                 | -                                          |       |             |
| 10%Fo        | o/n                                     | P                | 1/100                          | 9m        | 40°C         | -               | -           | -                  | -           | -               | -                | -                 | -                                          |       |             |
| 131          | Intrinsic Factor                        | 10%Fo            | -                              | P         | 1/3000       | o/n             | 4°C         | -                  | -           | -               | -                | AC                | BS                                         | 121°C | 15m         |
| 132          | Ki-67                                   | 10%Fo            | 24h                            | P         | 1/75~150     | 30m             | RT          | -                  | -           | -               | -                | BO                | Low pH                                     | 100°C | 20m         |
|              |                                         | 10%Fo            | 48h                            | P         | Ready to use | 10m             | RT          | -                  | -           | -               | -                | MV                | Target Retrieval Solution ( pH6, Dako)     | -     | 20m         |
|              |                                         | 10%Fo            | 4w                             | P         | 1/2          | 60m             | RT          | -                  | -           | -               | -                | Bo                | Target Retrieval Solution ( Dako)          | 98°C  | 20m         |
|              |                                         | 10%Fo            | 48h                            | P         | 1/800        | 60m             | RT          | -                  | -           | -               | -                | AC                | Target Retrieval Solution ( Dako)          | 121°C | 3m          |
|              |                                         | 10%Fo            | A few days (clinical specimen) | P         | 1/50         | o/n             | 4°C         | -                  | -           | -               | -                | AC                | Target Retrieval Solution ( Dako)          | 121°C | 20m         |
|              |                                         | 10%Fo            | w                              | P         | 1/100        | o/n             | 4°C         | -                  | -           | -               | -                | AC                | Citrate BS                                 | -     | 20m         |
|              |                                         | 10%Fo            | -                              | P         | 1/100        | 30m             | RT          | -                  | -           | -               | -                | PC                | Target Retrieval Solution ( pH9, Dako)     | 121°C | 15m         |
| 10%Fo        | w                                       | P                | 1/100                          | 20m       | RT           | -               | -           | -                  | -           | Bo              | Citrate BS       | 100°C             | 20m                                        |       |             |

Supplementary Table 9-3 Immunological properties of primary antibodies and IHC staining conditions

| No.                    | Antibody                                                                    | Secondary antibody          |                                                                                        |             |                |             |                 | Chromogenic substrate |                 | Photo. No. |
|------------------------|-----------------------------------------------------------------------------|-----------------------------|----------------------------------------------------------------------------------------|-------------|----------------|-------------|-----------------|-----------------------|-----------------|------------|
|                        |                                                                             | Kit product                 | Product                                                                                | Supplier    | Catalog Number | Temperature | Incubation time | Reagent               | Incubation time |            |
| 118                    | H <sup>+</sup> K <sup>+</sup> -ATPase                                       | Elite ABC                   | VECTASTAIN Elite ABC Kit (Rabbit IgG)                                                  | Vector Labs | PK-6101        | -           | -               | DAB                   | -               | Photo. 120 |
| 119                    | Heat Shock Protein 60                                                       | Histofine Simple Stain      | Histofine® Simple Stain™ Rat MAX PO (MULTI)                                            | Nichirei    | 414191F        | RT          | 30m             | DAB                   | 2m30s           |            |
| 120                    | Heme Oxygenase-1                                                            | Histofine Simple Stain      | Histofine® Simple Stain™ Rat MAX PO (M)                                                | Nichirei    | 414171         | RT          | 30m             | DAB                   | 4m              |            |
| 121                    | Hepatocyte                                                                  | Envision+                   | Envision+ System-HRP Labelled Polymer Anti-mouse                                       | Dako        | K4001          | RT          | 30m             | DAB                   | 3m              | Photo. 121 |
| 122                    | Hexanoyl Lysine (HEL)                                                       | Histofine Simple Stain      | Histofine® Simple Stain™ Rat MAX PO (MULTI)                                            | Nichirei    | 414191F        | -           | -               | -                     | -               |            |
| 123                    | 4-Hydroxy-2-nonenal                                                         | Histofine Simple Stain      | Histofine® Simple Stain™ Rat MAX PO (MULTI)                                            | Nichirei    | 414191F        | RT          | 30m             | DAB                   | 3m30s           |            |
|                        |                                                                             | Elite ABC                   | VECTASTAIN Elite ABC Kit (Mouse IgG)                                                   | Vector Labs | PK-6102        | RT          | 30m             | DAB                   | 1m30s           | Photo. 122 |
| 124                    | Iba 1                                                                       | LSAB                        | Universal LSAB2 Kit/HRP, Rabbit/Mouse                                                  | Dako        | K0679          | RT          | 30m             | DAB                   | 2m              |            |
|                        |                                                                             | Elite ABC                   | VECTASTAIN Elite ABC Kit (Mouse IgG)                                                   | Vector Labs | PK-6102        | RT          | 30m             | DAB                   | 1m              |            |
|                        |                                                                             | Envision                    | EnVision™+ Dual Link System-HRP                                                        | Dako        | K6043          | RT          | 30m             | DAB                   | 3m              | Photo. 125 |
|                        |                                                                             | Envision                    | EnVision+ System- HRP Labelled Polymer Anti-Rabbit                                     | Dako        | K4002          | 37°C        | 30m             | DAB                   | 2m              |            |
|                        |                                                                             | Histofine Simple Stain      | Histofine® Simple Stain™ Rat MAX PO (R)                                                | Nichirei    | 414181         | RT          | 30m             | DAB                   | 10m             |            |
|                        |                                                                             | Histofine Simple Stain      | Histofine® Simple Stain™ MAX-PO(MULTI)                                                 | Nichirei    | 424151         | RT          | 30m             | DAB                   | 10m             |            |
|                        |                                                                             | LSAB                        | Universal LSAB2 Kit/HRP, Rabbit/Mouse                                                  | Dako        | K0679          | RT          | 30m             | DAB                   | 30~40s          |            |
|                        |                                                                             | Histofine Simple Stain      | Histofine® Simple Stain™ Rat MAX PO (MULTI)                                            | Nichirei    | 414191         | RT          | 30m             | DAB                   | 2m              |            |
|                        |                                                                             | Envision                    | EnVision+ System- HRP Labelled Polymer Anti-Rabbit                                     | Dako        | K4002          | RT          | 30m             | DAB                   | 15s             | Photo. 124 |
|                        |                                                                             | Envision                    | EnVision+ System- HRP Labelled Polymer Anti-Rabbit                                     | Dako        | K4002          | RT          | 30m             | DAB                   | -               |            |
|                        |                                                                             | Envision                    | EnVision+ System- HRP Labelled Polymer Anti-Rabbit                                     | Dako        | K4002          | RT          | 60m             | DAB                   | 5m              |            |
|                        |                                                                             | -                           | -                                                                                      | -           | -              | -           | -               | DAB                   | -               |            |
|                        |                                                                             | Envision                    | EnVision™+ Dual Link System-HRP                                                        | Dako        | K4061          | 37°C        | 30m             | DAB                   | 1~2m            |            |
|                        |                                                                             | LSAB                        | Universal LSAB2 Kit/HRP, Rabbit/Mouse                                                  | Dako        | K0675          | RT          | 15m             | DAB                   | 5m              |            |
|                        |                                                                             | Histofine Simple Stain      | Histofine® Simple Stain™ Rat MAX PO (R)                                                | Nichirei    | 714181         | RT          | 30m             | DAB                   | 10m             |            |
|                        |                                                                             | Envision                    | EnVision+ System- HRP Labelled Polymer Anti-Rabbit                                     | Dako        | K4002          | RT          | 30m             | -                     | 3m              |            |
| Histofine Simple Stain | Histofine® Simple Stain™ Rat MAX-PO ( MULTI )                               | Nichirei                    | 714191                                                                                 | RT          | 30m            | DAB         | 10m             |                       |                 |            |
| Histofine Simple Stain | Histofine® Simple Stain™ Rat MAX PO (MULTI)                                 | Nichirei                    | 414191                                                                                 | 37°C        | 30m            | DAB         | 8m              |                       |                 |            |
| Alexa Fluor            | Donkey anti-Rabbit IgG (H+L) Secondary Antibody, Alexa Fluor® 555 conjugate | Life Technologies           | A-31572                                                                                | RT          | 30m            | -           | -               |                       |                 |            |
| 125                    | IFN-γ                                                                       | Histofine Simple Stain      | Histofine® Simple Stain™ Rat MAX PO (G)                                                | Nichirei    | 414331F        | RT          | 30m             | DAB                   | 5m              |            |
| 126                    | IgG, Fc(γ)                                                                  | Histofine Simple Stain      | Histofine® Simple Stain™ Rat MAX PO (G)                                                | Nichirei    | 414331         | RT          | 30m             | DAB                   | 5m              | Photo. 125 |
| 127                    | IgM, (μ)                                                                    | LSAB                        | Polyclonal Rabbit Anti-Goat Immunoglobulins/Biotinylated                               | Dako        | E0466          | RT          | 30m             | DAB                   | 5m              |            |
|                        |                                                                             | Histofine Simple Stain      | Histofine® Simple Stain™ Rat MAX PO (G)                                                | Nichirei    | 414331         | RT          | 30m             | DAB                   | 5m              | Photo. 126 |
| 128                    | IL-17                                                                       | Histofine Simple Stain      | Histofine® Simple Stain™ Rat MAX PO (MULTI)                                            | Nichirei    | 414191F        | RT          | 30m             | DAB                   | 1m15s           |            |
| 129                    | Inhibin α                                                                   | Histofine Simple Stain      | Histofine® Simple Stain™ Rat MAX PO (M)                                                | Nichirei    | 414171         | RT          | 30m             | DAB                   | -               | Photo. 127 |
| 130                    | Insulin                                                                     | Histofine Simple Stain      | Histofine® Simple Stain™ Rat MAX PO (MULTI)                                            | Nichirei    | 414191         | RT          | -               | DAB                   | ~1m             | Photo. 128 |
|                        |                                                                             | -                           | Histofine® Simple Stain™ Rat MAX PO (MULTI)                                            | Nichirei    | 414191         | -           | -               | DAB                   | -               |            |
|                        |                                                                             | Envision                    | EnVision+ System- HRP Labelled Polymer; Biotinylated Rabbit Anti-Mouse Immunoglobulins | Dako        | K4000; E0464   | RT          | 30m             | DAB; NF               | -               | Photo. 129 |
|                        |                                                                             | Histofine Simple Stain      | Histofine® Simple Stain™ MAX-PO(M)                                                     | Nichirei    | 424131         | RT          | 30m             | DAB                   | 20~30s          |            |
|                        |                                                                             | Biotinylated immunoglobulin | goat anti-guinea pig IgG-B                                                             | Santa Cruz  | sc-2440        | RT          | 30m             | DAB                   | 1m              |            |
|                        |                                                                             | Envision                    | EnVision™+ Dual Link System-HRP                                                        | Dako        | K4061          | 37°C        | 30m             | DAB                   | 1~2m            | Photo. 130 |
|                        |                                                                             | Envision                    | EnVision™+ Dual Link System-HRP                                                        | Dako        | K4063          | RT          | 30m             | DAB                   | 10m             |            |
| Histofine Simple Stain | Histofine® Simple Stain™ Mouse MAX PO (R)                                   | Nichirei                    | 414341                                                                                 | 40°C        | 4m             | DAB         | 10m             | Photo. 131            |                 |            |
| 131                    | Intrinsic Factor                                                            | Elite ABC                   | VECTASTAIN Elite ABC Kit (Rabbit IgG)                                                  | Vector Labs | PK-6101        | -           | -               | DAB                   | -               | Photo. 132 |
| 132                    | Ki-67                                                                       | Envision                    | EnVision™+ Dual Link System-HRP                                                        | Dako        | K4061          | 37°C        | 30m             | DAB                   | 1~2m            |            |
|                        |                                                                             | Histofine Simple Stain      | Histofine® Simple Stain™ Mouse MAX PO (R)                                              | Nichirei    | 414341         | RT          | 10m             | DAB                   | 5m              | Photo. 133 |
|                        |                                                                             | Envision                    | EnVision+ System- HRP Labelled Polymer                                                 | Dako        | K4000          | RT          | 30m             | DAB                   | 5m              | Photo. 134 |
|                        |                                                                             | Envision                    | EnVision+ System- HRP Labelled Polymer                                                 | Dako        | K4000          | RT          | 30m             | DAB                   | 1m              | Photo. 135 |
|                        |                                                                             | Envision+                   | Envision+ System-HRP Labelled Polymer Anti-mouse                                       | Dako        | K4001          | RT          | 30m             | DAB                   | 3m              |            |
|                        |                                                                             | LSAB                        | Universal LSAB2 Kit/HRP, Rabbit/Mouse                                                  | Dako        | K0675          | RT          | 15m             | DAB                   | 5m              |            |
|                        |                                                                             | Histofine Simple Stain      | Histofine® Simple Stain™ Rat MAX PO (M)                                                | Nichirei    | 414171         | RT          | 30m             | DAB                   | 4m              |            |
| Histofine Simple Stain | Histofine® Simple Stain™ Rat MAX PO (MULTI)                                 | Nichirei                    | 414191                                                                                 | RT          | 30m            | DAB         | 3m              |                       |                 |            |

Supplementary Table 10-1 Immunological properties of primary antibodies and IHC staining conditions

| No. | Primary antibody             |       |                      |                |          |             |                    |     |     |     |    |     |     |     |     |     |     |     |     |     |     |     |                              |                               | Positive Control  |       |                  |            |                  |                        |                         |
|-----|------------------------------|-------|----------------------|----------------|----------|-------------|--------------------|-----|-----|-----|----|-----|-----|-----|-----|-----|-----|-----|-----|-----|-----|-----|------------------------------|-------------------------------|-------------------|-------|------------------|------------|------------------|------------------------|-------------------------|
|     | Antibody                     |       |                      |                |          |             | Species reactivity |     |     |     |    |     |     |     |     |     |     |     |     |     |     |     |                              |                               |                   |       |                  |            |                  |                        |                         |
|     | Antigen                      | Clone | Supplier             | Catalog Number | Antibody | Host animal | All                | Rat | Mou | Dog | GP | Ham | Hum | Mon | Rab | Cat | Pig | Cow | Hor | She | Fer | Chi | Other                        |                               |                   |       |                  |            |                  |                        |                         |
| 132 | Ki-67                        | MIB-5 | Dako                 | M7248          | MoAb     | Mou         |                    |     |     |     |    |     |     |     |     |     |     |     |     |     |     |     |                              |                               | Pancreas          |       |                  |            |                  |                        |                         |
|     |                              |       |                      |                |          |             |                    |     |     |     |    |     |     |     |     |     |     |     |     |     |     |     |                              |                               |                   |       |                  |            |                  | Small intestine; Liver |                         |
|     |                              |       |                      |                |          |             |                    |     |     |     |    |     |     |     |     |     |     |     |     |     |     |     |                              |                               |                   |       |                  |            |                  |                        | Small intestine         |
|     |                              |       |                      |                |          |             |                    |     |     |     |    |     |     |     |     |     |     |     |     |     |     |     |                              |                               |                   |       |                  |            |                  |                        | Small intestine         |
|     |                              |       |                      |                |          |             |                    |     |     |     |    |     |     |     |     |     |     |     |     |     |     |     |                              |                               |                   |       |                  |            |                  |                        | Thymus                  |
|     |                              |       |                      |                |          |             |                    |     |     |     |    |     |     |     |     |     |     |     |     |     |     |     |                              |                               |                   |       |                  |            |                  |                        | Nucleus                 |
|     |                              |       |                      |                |          |             |                    |     |     |     |    |     |     |     |     |     |     |     |     |     |     |     |                              |                               |                   |       |                  |            |                  |                        | -                       |
|     |                              |       |                      |                |          |             |                    |     |     |     |    |     |     |     |     |     |     |     |     |     |     |     |                              |                               |                   |       |                  |            |                  |                        | Liver                   |
|     |                              |       |                      |                |          |             |                    |     |     |     |    |     |     |     |     |     |     |     |     |     |     |     |                              |                               |                   |       |                  |            |                  |                        | Spleen; Small intestine |
|     |                              |       |                      |                |          |             |                    |     |     |     |    |     |     |     |     |     |     |     |     |     |     |     |                              |                               |                   |       |                  |            |                  |                        | Digestive canal; Spleen |
|     |                              |       |                      |                |          |             |                    |     |     |     |    |     |     |     |     |     |     |     |     |     |     |     |                              | Liver                         |                   |       |                  |            |                  |                        |                         |
|     |                              |       |                      |                |          |             |                    |     |     |     |    |     |     |     |     |     |     |     |     |     |     |     |                              | Stomach                       |                   |       |                  |            |                  |                        |                         |
|     |                              |       |                      |                |          |             |                    |     |     |     |    |     |     |     |     |     |     |     |     |     |     |     |                              | Liver                         |                   |       |                  |            |                  |                        |                         |
|     |                              |       |                      |                |          |             |                    |     |     |     |    |     |     |     |     |     |     |     |     |     |     |     |                              | Liver; Stomach                |                   |       |                  |            |                  |                        |                         |
|     |                              | SP6   | Abcam                | ab16667        | MoAb     | Rab         |                    |     |     |     |    |     |     |     |     |     |     |     |     |     |     |     |                              | Intestine; Kidney             |                   |       |                  |            |                  |                        |                         |
|     |                              |       | Nichirei             | 418071         | MoAb     | Rab         |                    |     |     |     |    |     |     |     |     |     |     |     |     |     |     |     |                              | Liver                         |                   |       |                  |            |                  |                        |                         |
|     |                              |       | Abcam                | ab15580        | PoAb     | Rab         |                    |     |     |     |    |     |     |     |     |     |     |     |     |     |     |     |                              | Tumor                         |                   |       |                  |            |                  |                        |                         |
|     |                              |       | Millipore            | AB9260         | PoAb     | Rab         |                    |     |     |     |    |     |     |     |     |     |     |     |     |     |     |     |                              | Liver; Spleen; Adipose tissue |                   |       |                  |            |                  |                        |                         |
|     |                              |       | Novus Biologicals    | NB110-89717    | PoAb     | Rab         |                    |     |     |     |    |     |     |     |     |     |     |     |     |     |     |     |                              | Spleen; Intestine             |                   |       |                  |            |                  |                        |                         |
|     |                              |       |                      |                |          |             |                    |     |     |     |    |     |     |     |     |     |     |     |     |     |     |     |                              | Esophagus                     |                   |       |                  |            |                  |                        |                         |
|     |                              |       |                      |                |          |             |                    |     |     |     |    |     |     |     |     |     |     |     |     |     |     |     |                              | Liver                         |                   |       |                  |            |                  |                        |                         |
| 133 | KIM-1/Tim-1                  | -     | R&D systems          | AF3689         | PoAb     | Gt          |                    |     |     |     |    |     |     |     |     |     |     |     |     |     |     |     |                              | Kidney (damaged)              |                   |       |                  |            |                  |                        |                         |
|     |                              |       |                      |                |          |             |                    |     |     |     |    |     |     |     |     |     |     |     |     |     |     |     |                              |                               |                   |       | Kidney (damaged) |            |                  |                        |                         |
|     |                              |       |                      |                |          |             |                    |     |     |     |    |     |     |     |     |     |     |     |     |     |     |     |                              |                               |                   |       |                  |            | Kidney (damaged) |                        |                         |
|     |                              |       |                      |                |          |             |                    |     |     |     |    |     |     |     |     |     |     |     |     |     |     |     |                              |                               |                   |       |                  |            | Kidney           |                        |                         |
| 134 | Lactate Dehydrogenase        | H160  | Santa Cruz           | SC33781        | PoAb     | Rab         |                    |     |     |     |    |     |     |     |     |     |     |     |     |     |     |     | Kidney                       |                               |                   |       |                  |            |                  |                        |                         |
| 135 | Laminin                      | -     | Dako                 | Z0097          | PoAb     | Rab         |                    |     |     |     |    |     |     |     |     |     |     |     |     |     |     |     |                              | Liver; Lymph node; Spleen     |                   |       |                  |            |                  |                        |                         |
|     |                              |       | LSL                  | LB-1013        | PoAb     | Rab         |                    |     |     |     |    |     |     |     |     |     |     |     |     |     |     |     |                              | Basement membrane             |                   |       |                  |            |                  |                        |                         |
|     |                              |       | Sigma-Aldrich        | L9393          | PoAb     | Rab         |                    |     |     |     |    |     |     |     |     |     |     |     |     |     |     |     |                              |                               | Basement membrane |       |                  |            |                  |                        |                         |
|     |                              |       |                      |                |          |             |                    |     |     |     |    |     |     |     |     |     |     |     |     |     |     |     | Basal Lamina                 |                               |                   |       |                  |            |                  |                        |                         |
| 136 | LAMP-1                       | -     | Abcam                | ab24170        | PoAb     | Rab         |                    |     |     |     |    |     |     |     |     |     |     |     |     |     |     |     |                              | -                             |                   |       |                  |            |                  |                        |                         |
|     |                              |       | Sigma-Aldrich        | L1418          | PoAb     | Rab         |                    |     |     |     |    |     |     |     |     |     |     |     |     |     |     |     |                              |                               | -                 |       |                  |            |                  |                        |                         |
| 137 | LAMP-2                       | M3/84 | Santa Cruz           | sc-19991       | MoAb     | Rat         |                    |     |     |     |    |     |     |     |     |     |     |     |     |     |     |     |                              | Kidney (damaged)              |                   |       |                  |            |                  |                        |                         |
|     |                              |       | Affinity Bioreagents | PA1-655        | PoAb     | Rab         |                    |     |     |     |    |     |     |     |     |     |     |     |     |     |     |     |                              |                               | Liver             |       |                  |            |                  |                        |                         |
|     |                              |       |                      |                |          |             |                    |     |     |     |    |     |     |     |     |     |     |     |     |     |     |     |                              |                               | Liver             |       |                  |            |                  |                        |                         |
|     |                              |       | Invitrogen           | 51-2200        | PoAb     | Rab         |                    |     |     |     |    |     |     |     |     |     |     |     |     |     |     |     |                              |                               |                   | -     |                  |            |                  |                        |                         |
|     |                              |       |                      |                |          |             |                    |     |     |     |    |     |     |     |     |     |     |     |     |     |     |     |                              |                               |                   | Liver |                  |            |                  |                        |                         |
|     |                              |       | Lifespan Biosciences | LS-B3144       | MoAb     | Mou         |                    |     |     |     |    |     |     |     |     |     |     |     |     |     |     |     |                              | Liver                         |                   |       |                  |            |                  |                        |                         |
|     |                              |       |                      |                |          |             |                    |     |     |     |    |     |     |     |     |     |     |     |     |     |     |     | Liver                        |                               |                   |       |                  |            |                  |                        |                         |
|     |                              |       |                      |                |          |             |                    |     |     |     |    |     |     |     |     |     |     |     |     |     |     |     | Liver; Kidney; Adrenal gland |                               |                   |       |                  |            |                  |                        |                         |
|     |                              |       |                      |                |          |             |                    |     |     |     |    |     |     |     |     |     |     |     |     |     |     |     | -                            |                               |                   |       |                  |            |                  |                        |                         |
|     |                              |       |                      |                |          |             |                    |     |     |     |    |     |     |     |     |     |     |     |     |     |     |     | Lysosome                     |                               |                   |       |                  |            |                  |                        |                         |
| 138 | LC3                          | -     | MBL                  | PM036          | PoAb     | Rab         |                    |     |     |     |    |     |     |     |     |     |     |     |     |     |     |     |                              | All                           |                   |       |                  |            |                  |                        |                         |
| 139 | Lipocalin-2/NGAL             | -     | R&D systems          | AF1757         | PoAb     | Gt          |                    |     |     |     |    |     |     |     |     |     |     |     |     |     |     |     |                              | Kidney (damaged)              |                   |       |                  |            |                  |                        |                         |
| 140 | Luteinizing Hormone          | -     | Affinity Bioreagents | PA1-23783      | PoAb     | Rab         |                    |     |     |     |    |     |     |     |     |     |     |     |     |     |     |     |                              | Pituitary                     |                   |       |                  |            |                  |                        |                         |
|     |                              |       | Biogenesis           | 5720-7989      | PoAb     | Rab         |                    |     |     |     |    |     |     |     |     |     |     |     |     |     |     |     |                              |                               | Pituitary         |       |                  |            |                  |                        |                         |
|     |                              |       | Millipore            | AB944          | PoAb     | Rab         |                    |     |     |     |    |     |     |     |     |     |     |     |     |     |     |     |                              |                               | Pituitary         |       |                  |            |                  |                        |                         |
| 141 | Luteinizing Hormone Receptor | -     | Santa Cruz           | sc-25828       | PoAb     | Rab         |                    |     |     |     |    |     |     |     |     |     |     |     |     |     |     |     | Ovary; Testis                |                               |                   |       |                  |            |                  |                        |                         |
| 142 | Lysozyme                     | -     | Dako                 | A0099          | PoAb     | Rab         |                    |     |     |     |    |     |     |     |     |     |     |     |     |     |     |     |                              | Lung                          |                   |       |                  |            |                  |                        |                         |
|     |                              |       |                      |                |          |             |                    |     |     |     |    |     |     |     |     |     |     |     |     |     |     |     |                              |                               |                   |       |                  | Bone       |                  |                        |                         |
|     |                              |       |                      |                |          |             |                    |     |     |     |    |     |     |     |     |     |     |     |     |     |     |     | Histiocyte                   |                               |                   |       |                  |            |                  |                        |                         |
| 143 | MAC-2                        | M3/38 | Cedarlane            | CL8942AP       | MoAb     | Rat         |                    |     |     |     |    |     |     |     |     |     |     |     |     |     |     |     |                              | Macrophage                    |                   |       |                  |            |                  |                        |                         |
|     |                              |       |                      |                |          |             |                    |     |     |     |    |     |     |     |     |     |     |     |     |     |     |     |                              |                               |                   |       |                  | Macrophage |                  |                        |                         |



Supplementary Table 10-3 Immunological properties of primary antibodies and IHC staining conditions

| No.                         | Antibody                                                 | Secondary antibody                      |                                                                                     |                        |                                               |             |                 | Chromogenic substrate |                  | Photo. No. |      |            |
|-----------------------------|----------------------------------------------------------|-----------------------------------------|-------------------------------------------------------------------------------------|------------------------|-----------------------------------------------|-------------|-----------------|-----------------------|------------------|------------|------|------------|
|                             |                                                          | Kit product                             | Product                                                                             | Supplier               | Catalog Number                                | Temperature | Incubation time | Reagent               | Incubation time  |            |      |            |
| 132                         | Ki-67                                                    | Histofine Simple Stain                  | Histofine® Simple Stain™ Rat MAX PO (M)                                             | Nichirei               | 414171                                        | RT          | 30m             | DAB                   | 3m               |            |      |            |
|                             |                                                          | Histofine Simple Stain                  | Histofine® Simple Stain™ MAX-PO(M)                                                  | Nichirei               | 424131                                        | RT          | 1h              | DAB                   | 2m               |            |      |            |
|                             |                                                          | LSAB                                    | Universal LSAB2 Kit/HRP, Rabbit/Mouse                                               | Dako                   | K0679                                         | RT          | 30m             | DAB                   | 3m               |            |      |            |
|                             |                                                          | Envision                                | EnVision+ System- HRP Labelled Polymer                                              | Dako                   | K4000                                         | RT          | 30m             | DAB                   | -                |            |      |            |
|                             |                                                          | Histofine Simple Stain                  | Histofine® Simple Stain™ Rat MAX PO (M)                                             | Nichirei               | 414171                                        | RT          | 30m             | DAB                   | 10m              |            |      |            |
|                             |                                                          | Envision                                | EnVision™+ Dual Link System-HRP                                                     | Dako                   | K4063                                         | RT          | 30m             | DAB                   | 3m               |            |      |            |
|                             |                                                          | -                                       | -                                                                                   | -                      | -                                             | -           | -               | DAB                   | -                |            |      |            |
|                             |                                                          | Envision                                | EnVision+ System- HRP Labelled Polymer                                              | Dako                   | K4000                                         | RT          | 30m             | -                     | 10m              |            |      |            |
|                             |                                                          | Histofine Simple Stain                  | Histofine® Simple Stain™ Rat MAX PO (MULTI)                                         | Nichirei               | 414191                                        | RT          | 30m             | DAB                   | 30s              |            |      |            |
|                             |                                                          | Histofine Simple Stain                  | Histofine® Simple Stain™ Rat MAX PO (M)                                             | Nichirei               | 414171                                        | RT          | 30m             | DAB                   | 4m               |            |      |            |
|                             |                                                          | Histofine Simple Stain                  | Histofine® Simple Stain™ Rat MAX PO (M)                                             | Nichirei               | 414171                                        | RT          | 30m             | DAB                   | 4m               |            |      |            |
|                             |                                                          | Envision                                | EnVision+ System-HRP Labelled Polymer Anti-mouse                                    | Dako                   | K4006                                         | RT          | 1h              | DAB                   | 3m               |            |      |            |
|                             |                                                          | Histofine Simple Stain                  | Histofine® Simple Stain™ Rat MAX PO (MULTI)                                         | Nichirei               | 414191                                        | RT          | 30m             | DAB                   | 5m               | Photo. 136 |      |            |
|                             |                                                          | Histofine SAB-PO(M)                     | Histofine® SAB-PO ( M)                                                              | Nichirei               | 424022                                        | RT          | 10m             | DAB                   | Under observatio |            |      |            |
|                             |                                                          | 133                                     | KIM-1/Tim-1                                                                         | Histofine Simple Stain | Histofine® Simple Stain™ Mouse MAX PO (R)     | Nichirei    | 414341          | RT                    | 30m              | DAB        | 5m   | Photo. 137 |
|                             |                                                          |                                         |                                                                                     | Histofine Simple Stain | Histofine® Simple Stain™ Rat MAX-PO ( MULTI ) | Nichirei    | 714191          | RT                    | 30m              | DAB        | 1~5m |            |
| Histofine Simple Stain      | Histofine® Simple Stain™ Rat MAX-PO ( M )                |                                         |                                                                                     | Nichirei               | 714171                                        | RT          | 30m             | DAB                   | 10m              |            |      |            |
| ABC                         | VECTASTAIN ABC Kit (Rabbit IgG )                         |                                         |                                                                                     | Vector Labs            | PK-4001                                       | RT          | 30m             | DAB                   | 45s              | Photo. 138 |      |            |
| Envision                    | EnVision+ System- HRP Labelled Polymer Anti-Rabbit       |                                         |                                                                                     | Dako                   | K4002                                         | 37°C        | 30m             | DAB                   | 2m               |            |      |            |
| Envision                    | EnVision+ System- HRP Labelled Polymer Anti-Rabbit       |                                         |                                                                                     | Dako                   | K4002                                         | -           | 30m             | DAB                   | 4m               | Photo. 139 |      |            |
| Histofine Simple Stain      | Histofine® Simple Stain™ Mouse MAX PO (R)                |                                         |                                                                                     | Nichirei               | 414341                                        | RT          | 30m             | DAB                   | 40s              |            |      |            |
| Biotinylated immunoglobulin | Polyclonal Rabbit Anti-Goat Immunoglobulins/Biotinylated |                                         |                                                                                     | Dako                   | E0466                                         | 37°C        | 30m             | DAB                   | 2m               |            |      |            |
| Histofine Simple Stain      | Histofine® Simple Stain™ Rat MAX PO (G)                  |                                         |                                                                                     | Nichirei               | 414331                                        | RT          | 30m             | DAB                   | 30~90s           |            |      |            |
| Biotinylated immunoglobulin | Biotinylated Rabbit Anti-Goat IgG Antibody               |                                         |                                                                                     | Vector Labs            | BA-5000                                       | RT          | 30m             | DAB                   | 5m               | Photo. 140 |      |            |
| Histofine Simple Stain      | Histofine® Simple Stain™ Rat MAX PO (G)                  |                                         |                                                                                     | Nichirei               | 414331F                                       | -           | -               | -                     | -                |            |      |            |
| 134                         | Lactate Dehydrogenase                                    |                                         |                                                                                     | Histofine Simple Stain | Histofine® Simple Stain™ Rat MAX PO (MULTI)   | Nichirei    | 414191          | RT                    | 30m              | DAB        | 10m  |            |
| 135                         | Laminin                                                  | LSAB                                    | Polyclonal Swine Anti-Rabbit Immunoglobulins/Biotinylated Swine F(ab') <sub>2</sub> | Dako                   | E0431                                         | RT          | 30m             | DAB                   | 5m               |            |      |            |
|                             |                                                          | Histofine Simple Stain                  | Histofine® Simple Stain™ Rat MAX PO (R)                                             | Nichirei               | 414181                                        | RT          | 30m             | DAB                   | -                | Photo. 141 |      |            |
|                             |                                                          | Envision                                | EnVision+ System- HRP Labelled Polymer Anti-Rabbit                                  | Dako                   | K4002                                         | 37°C        | 30m             | DAB                   | 2m               |            |      |            |
|                             |                                                          | Histofine Simple Stain                  | Histofine® Simple Stain™ Rat MAX PO (MULTI)                                         | Nichirei               | 414191                                        | RT          | -               | DAB                   | 5m30s            | Photo. 142 |      |            |
| 136                         | LAMP-1                                                   | Histofine Simple Stain                  | Histofine® Simple Stain™ Rat MAX PO (MULTI)                                         | Nichirei               | 414191F                                       | RT          | 30m             | DAB                   | 4m               |            |      |            |
|                             |                                                          | Histofine Simple Stain                  | Histofine® Simple Stain™ Rat MAX PO (MULTI)                                         | Nichirei               | 414191F                                       | RT          | 30m             | DAB                   | 4m               |            |      |            |
| 137                         | LAMP-2                                                   | Histofine Simple Stain                  | Histofine® Simple Stain™ Mouse MAX PO (Rat)                                         | Nichirei               | 414311                                        | RT          | 30m             | DAB                   | 60s              | Photo. 143 |      |            |
|                             |                                                          | Envision                                | EnVision+ System- HRP Labelled Polymer Anti-Rabbit                                  | Dako                   | K4002                                         | RT          | 30m             | -                     | 3m               |            |      |            |
|                             |                                                          | Envision                                | EnVision+ System- HRP Labelled Polymer Anti-Rabbit                                  | Dako                   | K4002                                         | RT          | 60m             | DAB                   | 20m              |            |      |            |
|                             |                                                          | Histofine Simple Stain                  | Histofine® Simple Stain™ Rat MAX PO (MULTI)                                         | Nichirei               | 414191F                                       | RT          | 30m             | DAB                   | 3m               |            |      |            |
|                             |                                                          | Elite ABC                               | Biotinylated Goat Anti-Rabbit IgG Antibody                                          | Vector Labs            | BA-1000                                       | -           | -               | DAB                   | -                |            |      |            |
|                             |                                                          | Elite ABC                               | VECTASTAIN Elite ABC Kit (Rabbit IgG)                                               | Vector Labs            | PK-6101                                       | RT          | 30m             | DAB                   | 1m               | Photo. 144 |      |            |
|                             |                                                          | Goat anti-rabbit bio/ninylated antibody | Goat anti-rabbit biotinylated antibody                                              | Vector Labs            | -                                             | RT          | 30m             | DAB                   | 30s              |            |      |            |
|                             |                                                          | Histofine Simple Stain                  | Histofine® Simple Stain™ Rat MAX PO (MULTI)                                         | Nichirei               | 414191F                                       | RT          | 30m             | DAB                   | 3m30s            |            |      |            |
| 138                         | LC3                                                      | Histofine Simple Stain                  | Histofine® Simple Stain™ Rat MAX PO (MULTI)                                         | Nichirei               | 414191                                        | RT          | 30m             | DAB                   | 30s              | Photo. 145 |      |            |
|                             |                                                          | Histofine Simple Stain                  | Histofine® Simple Stain™ Rat MAX PO (MULTI)                                         | Nichirei               | 414191F                                       | RT          | 30m             | DAB                   | 6m               |            |      |            |
| 139                         | Lipocalin-2/NGAL                                         | Histofine Simple Stain                  | Histofine® Simple Stain™ Rat MAX PO (G)                                             | Nichirei               | 414331                                        | RT          | 30m             | DAB                   | 1~1.5m           | Photo. 146 |      |            |
| 140                         | Luteinizing Hormone                                      | Histofine Simple Stain                  | Histofine® Simple Stain™ Rat MAX PO (MULTI)                                         | Nichirei               | 414191F                                       | -           | -               | -                     | -                |            |      |            |
|                             |                                                          | -                                       | -                                                                                   | -                      | -                                             | -           | -               | -                     | -                |            |      |            |
| 141                         | Luteinizing Hormone Receptor                             | Histofine Simple Stain                  | Histofine® Simple Stain™ Rat MAX PO (R)                                             | Nichirei               | 414181                                        | RT          | 60m             | DAB                   | -                |            |      |            |
|                             |                                                          | Histofine Simple Stain                  | Histofine® Simple Stain™ Rat MAX PO (MULTI)                                         | Nichirei               | 414191F                                       | RT          | 30m             | DAB                   | 3m               |            |      |            |
| 142                         | Lysozyme                                                 | Envision                                | EnVision™+ Dual Link System-HRP                                                     | Dako                   | K4063                                         | RT          | 60m             | DAB                   | 30s              | Photo. 147 |      |            |
|                             |                                                          | Envision                                | EnVision+ System- HRP Labelled Polymer Anti-Rabbit                                  | Dako                   | K4002                                         | RT          | 30m             | DAB                   | -                |            |      |            |
|                             |                                                          | LSAB                                    | Universal LSAB2 Kit/HRP, Rabbit/Mouse                                               | Dako                   | K0675                                         | RT          | 15m             | DAB                   | 5m               |            |      |            |
| 143                         | MAC-2                                                    | Biotinylated immunoglobulin             | Biotinylated Rabbit Anti-Rat Immunoglobulins                                        | Dako                   | E0468                                         | RT          | 30m             | DAB                   | 3m               |            |      |            |
|                             |                                                          | Histofine Simple Stain                  | Histofine® Simple Stain™ Mouse MAX PO (Rat)                                         | Nichirei               | 414311                                        | -           | 30m             | DAB                   | 4m               | Photo. 148 |      |            |



Supplementary Table 11-2 Immunological properties of primary antibodies and IHC staining conditions

| No. | Antibody                         | Primary antibody |                                |           |                |                 |             |                    |             |                 |               |                   |                                        |             |             |                 |   |
|-----|----------------------------------|------------------|--------------------------------|-----------|----------------|-----------------|-------------|--------------------|-------------|-----------------|---------------|-------------------|----------------------------------------|-------------|-------------|-----------------|---|
|     |                                  | Fixing solution  | Fixing time                    | Embedding | Dilution       | Incubation time | Temperature | Protease treatment |             |                 |               | Antigen retrieval |                                        |             |             |                 |   |
|     |                                  |                  |                                |           |                |                 |             | Enzyme             | Temperature | Incubation time | Concentration | Method            | Heating                                |             | Temperature | Incubation time |   |
| 144 | Macrophage                       | 10%Fo            | 1d                             | P         | 1/100          | 60m             | RT          | Proteinase K       | RT          | 6m              | Ready to use  | -                 | -                                      | -           | -           | -               | - |
| 145 | Macrophage Scavenger Receptor A  | 10%Fo            | 24h                            | P         | 5 µg/mL        | o/n             | 4°C         | -                  | -           | -               | -             | MW                | Citrate BS                             | 98°C        | 10m         | -               | - |
| 146 | Macrophage/Dendritic Cells       | 10%Fo            | -                              | P         | 1/25           | o/n             | 4°C         | -                  | -           | -               | -             | -                 | -                                      | -           | -           | -               | - |
| 147 | MCM7                             | 10%Fo            | ∞                              | P         | 1/100          | 30m; 60mr       | RT          | -                  | -           | -               | -             | PC                | Citrate BS                             | 125°C; 90°C | 30s; 5s     | -               | - |
|     |                                  | 10%Fo            | 3~7d                           | P         | 1/2000         | 60m             | RT          | -                  | -           | -               | -             | MW                | Citrate BS                             | -           | -           | -               | - |
| 148 | Melan A                          | 10%Fo            | 24h                            | P         | -              | -               | -           | -                  | -           | -               | -             | -                 | -                                      | -           | -           | -               | - |
|     |                                  | 10%Fo            | 1w~                            | P         | Ready to use   | 30m             | RT          | -                  | -           | -               | -             | MW                | Citrate BS                             | -           | 10m         | -               | - |
|     |                                  | 10%Fo            | o/n                            | P         | 1/50           | o/n             | 4°C         | -                  | -           | -               | -             | MW                | BS                                     | -           | 10m         | -               | - |
|     |                                  | 10%Fo            | A few days (clinical specimen) | P         | 1/50           | o/n             | 4°C         | -                  | -           | -               | -             | AC                | Target Retrieval Solution ( Dako)      | 121°C       | 1m          | -               | - |
|     |                                  | 10%Fo            | 24h                            | P         | 1/200          | 60m             | RT          | -                  | -           | -               | -             | MW                | EDTA                                   | 95°C        | 20m         | -               | - |
|     |                                  | 10%Fo            | w                              | P         | Ready to use   | o/n             | 4°C         | -                  | -           | -               | -             | AC                | Citrate BS                             | -           | 20m         | -               | - |
| 149 | Melanoma                         | 10%Fo            | 24h                            | P         | 1/50           | 40m             | 37°C        | -                  | -           | -               | -             | -                 | -                                      | -           | -           | -               | - |
|     |                                  | 10%Fo            | -                              | P         | 1/25           | 60m             | RT          | -                  | -           | -               | -             | Bo                | BS                                     | -           | 20m         | -               | - |
| 150 | Mesothelin                       | 10%Fo            | ∞                              | P         | 1/200          | o/n             | 4°C         | -                  | -           | -               | -             | AC                | Citrate BS                             | 121°C       | 5m          | -               | - |
|     |                                  | 10%Fo            | ∞                              | P         | 1/2000         | 30m             | RT          | -                  | -           | -               | -             | MW                | Citrate BS (pH6)                       | -           | 10m         | -               | - |
|     |                                  | 10%Fo            | ∞                              | P         | 1/100          | 60m             | RT          | -                  | -           | -               | -             | Bo                | BS                                     | -           | 10m         | -               | - |
|     |                                  | 10%Fo            | 3~6d                           | P         | 1/250          | o/n             | 4°C         | -                  | -           | -               | -             | -                 | -                                      | -           | -           | -               | - |
| 151 | Metallothionein                  | 10%Fo            | o/n                            | P         | 1/50           | 60m             | 37°C        | -                  | -           | -               | -             | ND                | -                                      | -           | -           | -               | - |
| 152 | MHC class II (Human HLA-DR)      | 10%Fo            | 24h                            | P         | 1/20~40        | 30m             | RT          | -                  | -           | -               | -             | BO                | Target Retrieval Solution ( Dako)      | 100°C       | 20m         | -               | - |
|     |                                  | 10%Fo            | A few days (clinical specimen) | P         | 1/500          | o/n             | 4°C         | -                  | -           | -               | -             | AC                | Target Retrieval Solution ( Dako)      | 121°C       | 20m         | -               | - |
|     |                                  | 10%Fo            | w                              | P         | 1/100          | o/n             | 4°C         | -                  | -           | -               | -             | AC                | Citrate BS                             | -           | 20m         | -               | - |
|     |                                  | 10%Fo            | >1w                            | P         | 1/100          | o/n             | 4°C         | -                  | -           | -               | -             | MW                | Citrate BS                             | 95°C        | 15m         | -               | - |
| 153 | MHC class II (RT1B)              | PLP              | o/n                            | P; F      | 1/500          | 60m             | RT          | Proteinase K       | RT          | 10m             | 100 µg/ml     | -                 | -                                      | -           | -           | -               | - |
| 154 | β2-microglobulin                 | 10%Fo            | -                              | P         | 1/200          | o/n             | 4°C         | -                  | -           | -               | -             | MW                | Citrate BS                             | -           | 15m         | -               | - |
| 155 | Microtubule Associated Protein 2 | 10%Fo            | 3d                             | P         | 1/200          | o/n             | 4°C         | -                  | -           | -               | -             | MW                | Citrate BS                             | 98°C        | 10m         | -               | - |
| 156 | Mitochondria                     | 10%Fo            | w                              | P         | 1/400          | o/n             | 4°C         | -                  | -           | -               | -             | AC                | Citrate BS                             | -           | 20m         | -               | - |
| 157 | MLH1                             | 10%Fo            | 24h                            | P         | 1/1600         | o/n             | 4°C         | -                  | -           | -               | -             | PC                | Citrate BS                             | -           | 10m         | -               | - |
| 158 | Myelin Basic Protein             | 10%Fo            | 24h                            | P; F      | 1/1000         | 60m             | RT          | -                  | -           | -               | -             | MW                | Citrate BS                             | 95°C        | 20m         | -               | - |
|     |                                  | MD               | -                              | P         | 1/100          | o/n             | 4°C         | -                  | -           | -               | -             | MW                | Citrate BS                             | -           | 10m         | -               | - |
|     |                                  | 10%Fo            | o/n                            | P         | 1/300          | 60m             | RT          | -                  | -           | -               | -             | -                 | -                                      | -           | -           | -               | - |
|     |                                  | 10%Fo            | ∞                              | P         | 1/100          | o/n             | 4°C         | -                  | -           | -               | -             | AC                | Citrate BS                             | 121°C       | 5m          | -               | - |
| 159 | Myelin CNPase                    | 10%Fo            | -                              | P         | 1/200          | o/n             | 4°C         | -                  | -           | -               | -             | AC                | Citrate BS                             | 121°C       | 15m         | -               | - |
| 160 | Myelin Proteolipid Protein       | 10%Fo            | ∞                              | P         | 1/2000         | 60m             | RT          | -                  | -           | -               | -             | MW                | Citrate BS (pH6)                       | -           | 10m         | -               | - |
|     |                                  | 10%Fo            | 24h                            | P; F      | 1/500          | 60m             | RT          | -                  | -           | -               | -             | MW                | Citrate BS                             | 95°C        | 20m         | -               | - |
| 161 | Myeloid/Histiocyte Antigen       | 10%Fo            | -                              | P         | 1/1000 or more | o/n             | 4°C         | -                  | -           | -               | -             | MW                | HistoVT One                            | -           | 15m         | -               | - |
|     |                                  | 10%Fo            | 24h                            | P         | 1/200~400      | 30m             | RT          | Proteinase K       | 37°C        | 5m              | 0.4 mg/mL     | -                 | -                                      | -           | -           | -               | - |
|     |                                  | 10%Fo            | w                              | P         | 1/400          | o/n             | 4°C         | -                  | -           | -               | -             | AC                | Citrate BS                             | -           | 20m         | -               | - |
| 162 | MyoD1                            | 10%Fo            | A few days (clinical specimen) | P         | 1/50           | o/n             | 4°C         | -                  | -           | -               | -             | AC                | Target Retrieval Solution ( Dako)      | 121°C       | 20m         | -               | - |
| 163 | Myogenin                         | 10%Fo            | -                              | P         | 1/800          | o/n             | 4°C         | -                  | -           | -               | -             | AC                | Target Retrieval Solution ( pH6, Dako) | 121°C       | 15m         | -               | - |
|     |                                  | 10%Fo            | A few days (clinical specimen) | P         | 1/200          | o/n             | 4°C         | -                  | -           | -               | -             | AC                | Target Retrieval Solution ( Dako)      | 121°C       | 20m         | -               | - |
| 164 | Nectin 4                         | 10%Fo            | 24h                            | P         | 1/100          | -               | -           | -                  | -           | -               | -             | -                 | -                                      | -           | -           | -               | - |
| 165 | Nephrin C                        | Cold acetone     | 10m (1~8°C)                    | F         | 1/20           | o/n             | 1~8°C       | -                  | -           | -               | -             | ND                | -                                      | ND          | -           | -               | - |
| 166 | Nestin                           | 10%Fo            | ∞                              | P         | 1/100          | o/n             | 4°C         | -                  | -           | -               | -             | AC                | Citrate BS                             | 121°C       | 5m          | -               | - |
|     |                                  | PLP              | 4hr                            | P         | 1/100          | o/n             | 4°C         | -                  | -           | -               | -             | BO                | Citrate BS                             | 95°C        | 40m         | -               | - |
|     |                                  | 4%PFA            | 2h                             | P; F      | 1/500          | 60m             | RT          | -                  | -           | -               | -             | MW                | Citrate BS                             | 95°C        | 20m         | -               | - |
|     |                                  | 10%Fo            | -                              | P         | 1/100          | o/n             | 4°C         | -                  | -           | -               | -             | AC                | Citrate BS                             | 121°C       | 15m         | -               | - |
| 167 | NeuN                             | 10%Fo            | ∞                              | P         | 1/100          | o/n             | 4°C         | -                  | -           | -               | -             | AC                | Citrate BS                             | 121°C       | 5m          | -               | - |
|     |                                  | 10%Fo            | 48h                            | P         | 1/400          | 60m             | RT          | -                  | -           | -               | -             | AC                | Citrate BS                             | 121°C       | 3m          | -               | - |
|     |                                  | 10%Fo            | 24h                            | P; F      | 1/1000         | 60m             | RT          | -                  | -           | -               | -             | MW                | Citrate BS                             | 95°C        | 20m         | -               | - |



Supplementary Table 11-3 Immunological properties of primary antibodies and IHC staining conditions

| No. | Antibody                         | Secondary antibody                 |                                                                                     |             |                |             |                 | Chromogenic substrate |                 | Photo. No. |
|-----|----------------------------------|------------------------------------|-------------------------------------------------------------------------------------|-------------|----------------|-------------|-----------------|-----------------------|-----------------|------------|
|     |                                  | Kit product                        | Product                                                                             | Supplier    | Catalog Number | Temperature | Incubation time | Reagent               | Incubation time |            |
| 144 | Macrophage                       | Histofine Simple Stain             | Histofine® Simple Stain™ Mouse MAX PO (Rat)                                         | Nichirei    | 414311         | RT          | 30m             | DAB                   | 10m             | Photo. 149 |
| 145 | Macrophage Scavenger Receptor A  | Envision                           | EnVision+ System- HRP Labelled Polymer                                              | Dako        | K4000          | RT          | 30m             | DAB                   | -               |            |
| 146 | Macrophage/Dendritic Cells       | Envision                           | EnVision+ System- HRP Labelled Polymer                                              | Dako        | K4000          | RT          | 30m             | DAB                   | -               | Photo. 150 |
| 147 | MCM7                             | Histofine SAB-PO(M)                | Histofine® SAB-PO ( M )                                                             | Nichirei    | 424022         | RT          | 10m             | DAB                   | 3m              |            |
|     |                                  | LSAB                               | Polyclonal Swine Anti-Rabbit Immunoglobulins/Biotinylated Swine F(ab') <sub>2</sub> | Dako        | E0431          | RT          | 30m             | DAB                   | 5m              | Photo. 151 |
| 148 | Melan A                          | Envision                           | EnVision™+ Dual Link System-HRP                                                     | Dako        | K4061          | 37°C        | 30m             | DAB                   | 1~2m            |            |
|     |                                  | Histofine Simple Stain             | Histofine® Simple Stain™ MAX-PO(MULTI)                                              | Nichirei    | 424151         | RT          | 30m             | DAB                   | 10m             |            |
|     |                                  | Elite ABC                          | VECTASTAIN Elite ABC Kit (Mouse IgG)                                                | Vector Labs | PK-6102        | RT          | 30m             | DAB                   | 1m              |            |
|     |                                  | Envision+                          | Envision+ System-HRP Labelled Polymer Anti-mouse                                    | Dako        | K4001          | RT          | 30m             | DAB                   | 3m              |            |
|     |                                  | Histofine Simple Stain             | Histofine® Simple Stain™ Rat MAX-PO ( M )                                           | Nichirei    | 714171         | RT          | 30m             | DAB                   | 10m             | Photo. 152 |
| 149 | Melanoma                         | LSAB                               | Universal LSAB2 Kit/HRP, Rabbit/Mouse                                               | Dako        | K0675          | RT          | 15m             | DAB                   | 5m              |            |
|     |                                  | Envision                           | EnVision™+ Dual Link System-HRP                                                     | Dako        | K4061          | 37°C        | 30m             | DAB                   | 1~2m            |            |
| 150 | Mesothelin                       | Histofine Simple Stain             | Histofine® Simple Stain™ Rat MAX PO (MULTI)                                         | Nichirei    | 414191         | RT          | 30m             | DAB                   | 30s             | Photo. 153 |
|     |                                  | Envision                           | EnVision+ System- HRP Labelled Polymer Anti-Rabbit                                  | Dako        | K4002          | 37°C        | 30m             | DAB                   | 2m              | Photo. 154 |
|     |                                  | Envision                           | EnVision+ System- HRP Labelled Polymer Anti-Rabbit                                  | Dako        | K4002          | RT          | 30m             | -                     | 5m              |            |
|     |                                  | Histofine Simple Stain             | Histofine® Simple Stain™ Rat MAX PO (MULTI)                                         | Nichirei    | 414191         | RT          | 30m             | DAB                   | 30s             |            |
|     |                                  | Histofine Simple Stain             | Histofine® Simple Stain™ Rat MAX PO (MULTI)                                         | Nichirei    | 414191         | RT          | 30m             | DAB                   | 13m             |            |
| 151 | Metallothionein                  | Elite ABC                          | VECTASTAIN Elite ABC Kit (Mouse IgG)                                                | Vector Labs | PK-6102        | RT          | 30m             | DAB                   | 2m              | Photo. 155 |
| 152 | MHC class II (Human HLA-DR)      | Envision                           | EnVision™+ Dual Link System-HRP                                                     | Dako        | K4061          | 37°C        | 30m             | DAB                   | 1~2m            |            |
|     |                                  | Envision+                          | Envision+ System-HRP Labelled Polymer Anti-mouse                                    | Dako        | K4001          | RT          | 30m             | DAB                   | 3m              | Photo. 156 |
|     |                                  | LSAB                               | Universal LSAB2 Kit/HRP, Rabbit/Mouse                                               | Dako        | K0675          | RT          | 15m             | DAB                   | 5m              |            |
|     |                                  | ABC                                | VECTOR Red Alkaline Phosphatase (AP) Substrate Kit                                  | Vector Labs | SK-5100        | RT          | 30m             | VECTOR Red            | 30m             |            |
| 153 | MHC class II (RT1B)              | Histofine Simple Stain             | Histofine® Simple Stain™ Rat MAX-PO ( M )                                           | Nichirei    | 714171         | RT          | 30m             | DAB                   | 10m             | Photo. 157 |
| 154 | β2-microglobulin                 | Histofine Simple Stain             | Histofine® Simple Stain™ Rat MAX PO (MULTI)                                         | Nichirei    | 414191         | RT          | 30m             | DAB                   | 1~2m            | Photo. 158 |
| 155 | Microtubule Associated Protein 2 | LSAB                               | Universal LSAB2 Kit/HRP, Rabbit/Mouse                                               | Dako        | K0679          | RT          | 30m             | DAB                   | 1m30s~2m        |            |
| 156 | Mitochondria                     | LSAB                               | Universal LSAB2 Kit/HRP, Rabbit/Mouse                                               | Dako        | K0675          | RT          | 15m             | DAB                   | 5m              |            |
| 157 | MLH1                             | Biotinylated immunoglobulin        | Biotinylated Goat Anti-Rabbit IgG Antibody                                          | Vector Labs | BA-1000        | RT          | 30m             | DAB                   | -               | Photo. 159 |
| 158 | Myelin Basic Protein             | Histofine Simple Stain             | Histofine® Simple Stain™ Rat MAX-PO ( R )                                           | Nichirei    | 714181         | RT          | 30m             | DAB                   | 10m             | Photo. 160 |
|     |                                  | Histofine Simple Stain             | Histofine® Simple Stain™ Rat MAX PO (MULTI)                                         | Nichirei    | 414191         | RT          | 30m             | DAB                   | 1~2m            | Photo. 161 |
|     |                                  | Envision                           | EnVision+ System- HRP Labelled Polymer Anti-Rabbit                                  | Dako        | K4002          | RT          | 30m             | DAB                   | 3m              | Photo. 162 |
|     |                                  | Envision                           | EnVision+ System- HRP Labelled Polymer Anti-Rabbit                                  | Dako        | K4002          | 37°C        | 30m             | DAB                   | 1m30s           | Photo. 163 |
|     |                                  | Envision                           | EnVision+ System- HRP Labelled Polymer                                              | Dako        | K4000          | RT          | 30m             | DAB                   | -               |            |
| 159 | Myelin CNPase                    | Envision                           | EnVision+ System- HRP Labelled Polymer                                              | Dako        | K4000          | RT          | 30m             | DAB                   | -               |            |
| 160 | Myelin Proteolipid Protein       | Envision                           | EnVision+ System- HRP Labelled Polymer Anti-Rabbit                                  | Dako        | K4002          | RT          | 30m             | -                     | 1m              |            |
|     |                                  | Histofine Simple Stain             | Histofine® Simple Stain™ Rat MAX-PO ( R )                                           | Nichirei    | 714181         | RT          | 30m             | DAB                   | 10m             | Photo. 164 |
| 161 | Myeloid/Histiocyte Antigen       | Histofine Simple Stain             | Histofine® Simple Stain™ Rat MAX PO (MULTI)                                         | Nichirei    | 414191F        | RT          | 30m             | DAB                   | 1m              |            |
|     |                                  | Envision                           | EnVision™+ Dual Link System-HRP                                                     | Dako        | K4061          | 37°C        | 30m             | DAB                   | 1~2m            |            |
|     |                                  | LSAB                               | Universal LSAB2 Kit/HRP, Rabbit/Mouse                                               | Dako        | K0675          | RT          | 15m             | DAB                   | 5m              |            |
| 162 | MyoD1                            | Envision+                          | Envision+ System-HRP Labelled Polymer Anti-mouse                                    | Dako        | K4001          | RT          | 30m             | DAB                   | 3m              | Photo. 165 |
| 163 | Myogenin                         | Elite ABC                          | Biotinylated Horse Anti-Mouse IgG Antibody, rat adsorbed                            | Vector Labs | BA-2001        | RT          | 30m             | DAB                   | 4~5m            | Photo. 166 |
|     |                                  | Envision+                          | Envision+ System-HRP Labelled Polymer Anti-mouse                                    | Dako        | K4001          | RT          | 30m             | DAB                   | 3m              | Photo. 167 |
| 164 | Nectin 4                         | Histofine Simple Stain             | Histofine® Simple Stain™ Rat MAX PO (G)                                             | Nichirei    | 414331F        | 37°C        | 30m             | DAB                   | 1~2m            |            |
| 165 | Nephrin C                        | Fluorophore laveled immunoglobulin | Swine Anti-Rabbit Immunoglobulins/FITC                                              | Dako        | F0205          | RT          | 1h              | -                     | -               | Photo. 168 |
| 166 | Nestin                           | Envision                           | EnVision+ System- HRP Labelled Polymer                                              | Dako        | K4000          | 37°C        | 30m             | DAB                   | 2m              |            |
|     |                                  | Envision                           | EnVision™+ Dual Link System-HRP                                                     | Dako        | K4063          | RT          | 60m             | DAB                   | 2m              |            |
|     |                                  | Histofine Simple Stain             | Histofine® Simple Stain™ Rat MAX-PO ( M )                                           | Nichirei    | 714171         | RT          | 30m             | DAB                   | 10m             | Photo. 169 |
|     |                                  | Envision                           | EnVision+ System- HRP Labelled Polymer                                              | Dako        | K4000          | RT          | 30m             | DAB                   | -               |            |
| 167 | NeuN                             | Envision                           | EnVision+ System- HRP Labelled Polymer                                              | Dako        | K4000          | 37°C        | 30m             | DAB                   | 2m              |            |
|     |                                  | Envision                           | EnVision+ System- HRP Labelled Polymer                                              | Dako        | K4000          | RT          | 30m             | DAB                   | 1m              | Photo. 170 |
|     |                                  | Histofine Simple Stain             | Histofine® Simple Stain™ Rat MAX-PO ( R )                                           | Nichirei    | 714181         | RT          | 30m             | DAB                   | 10m             |            |

Supplementary Table 12-1 Immunological properties of primary antibodies and IHC staining conditions

| No. | Primary antibody        |               |               |                |          |             |                    |     |     |     |    |     |     |     |     |     |     |     |     |     |     | Positive Control |                         |                                  |                          |       |                         |                 |                   |                                |
|-----|-------------------------|---------------|---------------|----------------|----------|-------------|--------------------|-----|-----|-----|----|-----|-----|-----|-----|-----|-----|-----|-----|-----|-----|------------------|-------------------------|----------------------------------|--------------------------|-------|-------------------------|-----------------|-------------------|--------------------------------|
|     | Antibody                |               |               |                |          |             | Species reactivity |     |     |     |    |     |     |     |     |     |     |     |     |     |     |                  |                         |                                  |                          |       |                         |                 |                   |                                |
|     | Antigen                 | Clone         | Supplier      | Catalog Number | Antibody | Host animal | All                | Rat | Mou | Dog | GP | Ham | Hum | Mon | Rab | Cat | Pig | Cow | Hor | She | Fer |                  | Chi                     | Other                            |                          |       |                         |                 |                   |                                |
| 168 | Neurofilament           | 2F11          | Dako          | IR607          | MoAb     | Mou         |                    |     |     | o   |    |     |     |     |     |     |     |     |     |     |     |                  |                         | PNS                              |                          |       |                         |                 |                   |                                |
|     |                         |               |               |                |          |             |                    |     |     |     |    |     |     |     |     |     |     |     |     |     |     |                  |                         |                                  |                          | Brain |                         |                 |                   |                                |
|     |                         |               |               |                |          |             |                    |     |     |     |    |     |     |     |     |     |     |     |     |     |     |                  |                         |                                  |                          |       | Brain                   |                 |                   |                                |
|     |                         |               |               |                |          |             |                    |     |     |     |    |     |     |     |     |     |     |     |     |     |     |                  |                         |                                  |                          |       | Digestive canal         |                 |                   |                                |
|     |                         |               |               |                |          |             |                    |     |     |     |    |     |     |     |     |     |     |     |     |     |     |                  |                         |                                  |                          |       | Cerebellum; Spinal cord |                 |                   |                                |
|     |                         |               |               |                |          |             |                    |     |     |     |    |     |     |     |     |     |     |     |     |     |     |                  |                         |                                  |                          |       |                         | Brain           |                   |                                |
|     |                         |               |               |                |          |             |                    |     |     |     |    |     |     |     |     |     |     |     |     |     |     |                  |                         |                                  |                          |       | Neuron                  |                 |                   |                                |
|     |                         |               |               |                |          |             |                    |     |     |     |    |     |     |     |     |     |     |     |     |     |     |                  |                         |                                  |                          |       | Brain                   |                 |                   |                                |
|     |                         |               |               |                |          |             |                    |     |     |     |    |     |     |     |     |     |     |     |     |     |     |                  |                         | Brain                            |                          |       |                         |                 |                   |                                |
|     |                         |               |               |                |          |             |                    |     |     |     |    |     |     |     |     |     |     |     |     |     |     |                  |                         | Nerve tissue                     |                          |       |                         |                 |                   |                                |
|     |                         |               |               |                |          |             |                    |     |     |     |    |     |     |     |     |     |     |     |     |     |     |                  |                         | Brain                            |                          |       |                         |                 |                   |                                |
|     |                         |               |               |                |          |             |                    |     |     |     |    |     |     |     |     |     |     |     |     |     |     |                  |                         | Nerve tissue                     |                          |       |                         |                 |                   |                                |
| 169 | Neurofilament 200       | NE14          | Sigma-Aldrich | N5389          | MoAb     | Mou         |                    | o   |     |     |    |     |     |     |     |     |     |     |     |     |     |                  |                         | Brain                            |                          |       |                         |                 |                   |                                |
| 170 | Neurofilament L         | -             | Millipore     | AB9568         | PoAb     | Rab         |                    |     |     |     |    |     |     |     |     |     |     |     |     |     |     |                  |                         | Brain                            |                          |       |                         |                 |                   |                                |
| 171 | Neuron-Specific Enolase | BBS/NC/VI-H14 | Dako          | IR612          | MoAb     | Mou         |                    |     |     |     |    |     |     |     |     |     |     |     |     |     |     |                  |                         | Nerve tissue                     |                          |       |                         |                 |                   |                                |
|     |                         | -             | Nichirei      | 422081         | PoAb     | Rab         |                    | o   |     |     |    |     |     |     |     |     |     |     |     |     |     |                  |                         | Neuroendocrine cells; Schwannoma |                          |       |                         |                 |                   |                                |
|     |                         |               |               |                |          |             |                    | o   |     |     |    |     |     |     |     |     |     |     |     |     |     |                  |                         | Testis                           |                          |       |                         |                 |                   |                                |
|     |                         |               |               |                |          |             |                    | o   |     |     |    |     |     |     |     |     |     |     |     |     |     |                  |                         | Brain                            |                          |       |                         |                 |                   |                                |
| 172 | NG2                     | -             | Millipore     | AB5320         | PoAb     | Rab         |                    | o   | o   | o   |    |     |     |     |     |     |     |     |     |     |     |                  |                         | Brain                            |                          |       |                         |                 |                   |                                |
| 173 | 3-Nitrotyrosine         | 39B6          | Abcam         | ab61392        | MoAb     | Mou         | o                  |     |     |     |    |     |     |     |     |     |     |     |     |     |     |                  |                         | All                              |                          |       |                         |                 |                   |                                |
| 174 | OCT3/4                  | C-10          | Santa Cruz    | SC-5279        | MoAb     | Mou         |                    | o   |     |     |    |     |     |     |     |     |     |     |     |     |     |                  |                         | Testis                           |                          |       |                         |                 |                   |                                |
| 175 | Olig2                   | -             | IBL           | 18953          | PoAb     | Rab         |                    | o   | o   | o   |    |     |     |     |     |     |     |     |     |     |     |                  |                         |                                  | Brain                    |       |                         |                 |                   |                                |
|     |                         |               |               |                |          |             |                    | o   |     |     |    |     |     |     |     |     |     |     |     |     |     |                  |                         |                                  |                          |       |                         | Brain           |                   |                                |
|     |                         |               |               |                |          |             |                    | o   |     |     |    |     |     |     |     |     |     |     |     |     |     |                  |                         |                                  |                          |       |                         |                 | Nerve tissue      |                                |
|     |                         |               |               |                |          |             |                    | o   |     |     |    |     |     |     |     |     |     |     |     |     |     |                  |                         |                                  |                          |       |                         |                 |                   | Brain                          |
|     |                         |               |               |                |          |             |                    | o   |     |     |    |     |     |     |     |     |     |     |     |     |     |                  |                         |                                  |                          |       |                         |                 |                   | Spinal cord; Brain             |
|     |                         |               |               |                |          |             |                    | o   |     |     |    |     |     |     |     |     |     |     |     |     |     |                  |                         |                                  |                          |       |                         |                 |                   | Brain                          |
|     |                         |               |               |                |          |             |                    | o   |     |     |    |     |     |     |     |     |     |     |     |     |     |                  |                         | Brain                            |                          |       |                         |                 |                   |                                |
| 176 | Osteocalcin             | OCG3          | Abcam         | ab13420        | MoAb     | Mou         |                    | o   |     |     |    |     |     |     |     |     |     |     |     |     |     |                  |                         | Osteoblast                       |                          |       |                         |                 |                   |                                |
|     |                         |               |               |                |          |             |                    |     |     |     |    |     |     |     |     |     |     |     |     |     |     |                  |                         |                                  | Bone                     |       |                         |                 |                   |                                |
|     |                         |               |               |                |          |             |                    |     |     |     |    |     |     |     |     |     |     |     |     |     |     |                  |                         |                                  |                          | Bone  |                         |                 |                   |                                |
| 177 | Osterix                 | -             | Abcam         | ab22552        | PoAb     | Rab         |                    | o   |     |     |    |     |     |     |     |     |     |     |     |     |     |                  |                         | Osteoblast                       |                          |       |                         |                 |                   |                                |
|     |                         |               |               |                |          |             |                    | o   |     |     |    |     |     |     |     |     |     |     |     |     |     |                  |                         |                                  |                          |       | Osteosarcoma            |                 |                   |                                |
|     |                         |               |               |                |          |             |                    | o   | o   |     |    |     |     |     |     |     |     |     |     |     |     |                  |                         |                                  |                          |       |                         |                 | Bone-derived cell |                                |
|     |                         |               |               |                |          |             |                    | o   | o   |     |    |     |     |     |     |     |     |     |     |     |     |                  |                         |                                  |                          |       |                         |                 | Osteoblast        |                                |
| 178 | p62/SQSTM1              | -             | MBL           | PM045          | PoAb     | Rab         |                    | o   | o   |     |    | o   | o   |     |     |     |     |     |     |     |     |                  | All                     |                                  |                          |       |                         |                 |                   |                                |
| 179 | Paraoxonase 2 (PON2)    | -             | Abcam         | ab40969        | PoAb     | Rab         |                    | o   | o   | o   |    |     | o   | o   |     |     |     | o   |     |     |     | o                | All                     |                                  |                          |       |                         |                 |                   |                                |
| 180 | Parathyroid Hormone     | -             | Yanaihara     | Y421           | PoAb     | Rab         |                    | o   |     |     |    |     |     |     |     |     |     |     |     |     |     |                  | Thyroid                 |                                  |                          |       |                         |                 |                   |                                |
| 181 | Pax5                    | EPR3730(2)    | Abcam         | ab109443       | MoAb     | Rab         |                    |     | o   |     |    |     |     |     |     |     |     |     |     |     |     |                  |                         | Thymus                           |                          |       |                         |                 |                   |                                |
|     |                         |               | Abcam         | ab15164        | PoAb     | Rab         |                    |     |     | o   |    |     |     |     |     |     |     |     |     |     |     |                  |                         |                                  | Lymph node               |       |                         |                 |                   |                                |
| 182 | Pax6                    | -             | BioLegend     | PRB-278P       | PoAb     | Rab         |                    | o   |     |     |    |     |     |     |     |     |     |     |     |     |     |                  |                         | Eye                              |                          |       |                         |                 |                   |                                |
| 183 | PCNA                    | PC10          | Dako          | M0879          | MoAb     | Mou         |                    | o   | o   |     |    |     |     |     |     |     |     |     |     |     |     |                  |                         |                                  | Liver; Kidney; Intestine |       |                         |                 |                   |                                |
|     |                         |               |               |                |          |             |                    | o   |     |     |    |     |     |     |     |     |     |     |     |     |     |                  |                         |                                  |                          |       |                         | Harderian gland |                   |                                |
|     |                         |               |               |                |          |             |                    | o   |     |     |    |     |     |     |     |     |     |     |     |     |     |                  |                         |                                  |                          |       |                         |                 | Digestive canal   |                                |
|     |                         |               |               |                |          |             |                    | o   | o   | o   |    |     |     |     |     |     |     |     |     |     |     |                  |                         |                                  |                          |       |                         |                 |                   | Proliferated cell              |
|     |                         |               |               |                |          |             |                    | o   |     |     |    |     |     |     |     |     |     |     |     |     |     |                  |                         |                                  |                          |       |                         |                 |                   | Small intestine                |
|     |                         |               |               |                |          |             |                    | o   |     |     |    |     |     |     |     |     |     |     |     |     |     |                  |                         |                                  |                          |       |                         |                 |                   | Ovary                          |
|     |                         |               |               |                |          |             |                    | o   | o   | o   |    |     |     |     |     |     |     |     |     |     |     |                  |                         |                                  |                          |       |                         |                 |                   | Small intestine; Adrenal gland |
|     |                         |               |               |                |          |             |                    | o   |     |     |    |     |     |     |     |     |     |     |     |     |     |                  |                         |                                  |                          |       |                         |                 |                   | Intestine; Skin                |
|     |                         |               |               |                |          |             |                    | o   | o   |     |    |     |     |     |     |     |     |     |     |     |     |                  |                         |                                  |                          |       |                         |                 |                   | Liver; Intestine; Stomach      |
|     |                         |               |               |                |          |             |                    | o   |     |     |    |     |     |     |     |     |     |     |     |     |     |                  |                         |                                  |                          |       |                         |                 |                   | All                            |
|     |                         |               |               |                |          |             |                    | o   | o   |     |    |     |     |     |     |     |     |     |     |     |     |                  |                         |                                  |                          |       |                         |                 |                   | -                              |
|     |                         |               |               |                |          |             |                    |     |     |     |    |     |     |     |     |     |     |     |     |     |     | o                | Proliferated tumor cell |                                  |                          |       |                         |                 |                   |                                |
|     |                         |               |               |                |          |             |                    |     |     |     |    |     |     |     |     |     |     |     |     |     |     | o                | Proliferated cell       |                                  |                          |       |                         |                 |                   |                                |

Supplementary Table 12-2 Immunological properties of primary antibodies and IHC staining conditions

| No. | Antibody                | Primary antibody          |                                |           |                     |                 |             |                    |             |                 |               |                       |                                        |   |             |                 |
|-----|-------------------------|---------------------------|--------------------------------|-----------|---------------------|-----------------|-------------|--------------------|-------------|-----------------|---------------|-----------------------|----------------------------------------|---|-------------|-----------------|
|     |                         | Fixing solution           | Fixing time                    | Embedding | Dilution            | Incubation time | Temperature | Protease treatment |             |                 |               | Antigen retrieval     |                                        |   |             |                 |
|     |                         |                           |                                |           |                     |                 |             | Enzyme             | Temperature | Incubation time | Concentration | Method                | Solution                               |   | Temperature | Incubation time |
| 168 | Neurofilament           | 10%Fo                     | 24h                            | P         | 1/50~100            | 40m             | 37°C        | -                  | -           | -               | -             | BO                    | Target Retrieval Solution ( Dako)      |   | 100°C       | 20m             |
|     |                         | 10%Fo                     | A few days (clinical specimen) | P         | Ready to use        | o/n             | 4°C         | -                  | -           | -               | -             | AC                    | Target Retrieval Solution ( Dako)      |   | 121°C       | 20m             |
|     |                         | 10%Fo                     | ∞                              | P         | 1/50                | o/n             | 4°C         | -                  | -           | -               | -             | AC                    | Citrate BS                             |   | 121°C       | 5m              |
|     |                         | 10%Fo                     | 24h                            | P         | 1/200               | o/n             | 4°C         | -                  | -           | -               | -             | MW                    | Citrate BS                             |   | 98°C        | 10m             |
|     |                         | 10%Fo                     | 3~7d                           | P         | 1/1000              | 60m             | RT          | -                  | -           | -               | -             | AC                    | Citrate BS                             |   | 121°C       | 20m             |
|     |                         | 10%Fo                     | -                              | P         | 1/100               | o/n             | 4°C         | -                  | -           | -               | -             | AC                    | Citrate BS                             |   | 121°C       | 15m             |
|     |                         | 10%Fo                     | ~1y                            | P         | 1/400               | o/n             | 4°C         | -                  | -           | -               | -             | MW                    | Citrate BS                             |   | 95°C        | 30m             |
|     |                         | 4%ZnFo                    | 2d                             | P         | 1/100               | o/n             | 4°C         | -                  | -           | -               | -             | MW                    | Citrate BS                             |   | 100°C       | 15m             |
|     |                         | 10%Fo                     | 4w                             | P         | 1/100               | 30m             | RT          | -                  | -           | -               | -             | MW                    | DW                                     |   | -           | 5m              |
|     |                         | 10%Fo                     | ∞                              | P         | 1/200               | 30m             | RT          | Proteinase K       | RT          | 10m             | 0.4 mg/mL     | -                     | -                                      | - | -           |                 |
|     |                         | Not Fo; GA                | 1d~1w                          | P; F      | 1/50~400; 1/100(Fo) | 60m             | RT          | -                  | -           | -               | -             | MW                    | Citrate BS ( pH6), Immunosaver         |   | -           | 6m              |
| 169 | Neurofilament 200       | -                         | -                              | P         | 1/1000              | o/n             | 4°C         | -                  | -           | -               | -             | -                     | -                                      | - | -           | -               |
| 170 | Neurofilament L         | 10%Fo                     | ∞                              | P         | 1/400               | 60m             | RT          | -                  | -           | -               | -             | MW                    | Citrate BS (pH6)                       |   | -           | 10m             |
| 171 | Neuron-Specific Enolase | 10%Fo                     | 1y                             | P         | Ready to use        | 60m             | RT          | -                  | -           | -               | -             | Bo                    | Citrate BS                             |   | 95 ~ 99°C   | 20m             |
|     |                         | 10%Fo                     | 24h                            | P         | Ready to use        | 40m             | 37°C        | -                  | -           | -               | -             | -                     | -                                      | - | -           |                 |
|     |                         | 10%Fo                     | -                              | P         | Ready to use        | 30m             | RT          | -                  | -           | -               | -             | -                     | -                                      | - | -           |                 |
|     |                         | 10%Fo                     | -                              | P         | 1/10                | 30m             | RT          | -                  | -           | -               | -             | PC                    | Target Retrieval Solution ( pH6, Dako) |   | 125°C       | 0.5m            |
| 172 | NG2                     | Perfusion fixation for EM | o/n                            | P         | 1/50                | o/n             | 4°C         | -                  | -           | -               | -             | MW                    | Citrate BS                             |   | 98°C        | 15m             |
| 173 | 3-Nitrotyrosine         | 10%Fo; Bouin              | -                              | P         | 1/50                | o/n             | 4°C         | -                  | -           | -               | -             | Acetone dipping (15m) | -                                      | - | -           |                 |
| 174 | OCT3/4                  | 10%Fo                     | -                              | P         | 1/800               | o/n             | 4°C         | -                  | -           | -               | -             | -                     | -                                      | - | -           |                 |
| 175 | Olig2                   | 10%Fo                     | 3d                             | P         | 1/100               | o/n             | 4°C         | -                  | -           | -               | -             | MW                    | Citrate BS                             |   | 98°C        | 10m             |
|     |                         | 10%Fo                     | -                              | P         | 1/100               | o/n             | 4°C         | -                  | -           | -               | -             | MW                    | Citrate BS                             |   | -           | 15m             |
|     |                         | 10%Fo                     | 24h                            | P; F      | 1/1000              | 60m             | RT          | -                  | -           | -               | -             | MW                    | Citrate BS                             |   | 95°C        | 20m             |
|     |                         | 10%Fo                     | ∞                              | P         | 1/100               | o/n             | 4°C         | -                  | -           | -               | -             | MW                    | Citrate BS (pH9)                       |   | -           | 10m             |
|     |                         | 10%Fo                     | 1w                             | P         | 1/500               | 60m             | RT          | -                  | -           | -               | -             | MW                    | Citrate BS                             |   | 98°C        | 15m             |
|     |                         | 10%Fo                     | 1w                             | P         | 1/1000              | 60m             | RT          | -                  | -           | -               | -             | MW                    | Citrate BS                             |   | 98°C        | 15m             |
|     |                         | 10%Fo                     | 1d                             | P         | 1/1000              | o/n             | 4°C         | -                  | -           | -               | -             | MW                    | Immunosaver                            |   | 98°C        | 10m             |
| 176 | Osteocalcin             | 10%Fo                     | ∞                              | P         | 1/100               | 60m             | RT          | Proteinase K       | RT          | 8m              | -             | -                     | -                                      | - | -           |                 |
|     |                         | 10%Fo                     | 1y                             | P         | 1/100               | 60m             | RT          | -                  | -           | -               | -             | -                     | -                                      | - | -           |                 |
|     |                         | 10%Fo                     | 1w                             | P         | 1/200               | 60m             | RT          | Proteinase K       | RT          | 5m              | Ready to use  | -                     | -                                      | - | -           |                 |
| 177 | Osterix                 | 10%Fo                     | ∞                              | P         | 1/200               | 60m             | RT          | -                  | -           | -               | -             | Bo                    | PT link (pH9)                          |   | 95°C        | 20m             |
|     |                         | 10%Fo                     | ∞                              | P         | 1/200               | o/n             | 4°C         | -                  | -           | -               | -             | AC                    | Citrate BS                             |   | 121°C       | 5m              |
|     |                         | 10%Fo                     | -                              | P         | 1/200               | o/n             | 4°C         | -                  | -           | -               | -             | Proteinase K          | -                                      | - | -           |                 |
|     |                         | 10%Fo                     | 1y                             | P         | 1/200               | 60m             | RT          | -                  | -           | -               | -             | -                     | -                                      | - | -           |                 |
| 178 | p62/SQSTM1              | 10%Fo                     | -                              | P         | 1/2000              | o/n             | 4°C         | -                  | -           | -               | -             | MW                    | HistoVT One                            |   | -           | 15m             |
| 179 | Paraoxonase 2 (PON2)    | 10%Fo; Bouin              | -                              | P         | 1/1000              | o/n             | 4°C         | -                  | -           | -               | -             | MW                    | HistoVT One                            |   | -           | 15m             |
| 180 | Parathyroid Hormone     | -                         | -                              | P         | 1/50                | 60m             | RT          | -                  | -           | -               | -             | He                    | CC2 (Roche)                            |   | 98°C        | 30m             |
| 181 | Pax5                    | 10%Fo                     | -                              | P         | 1/300               | o/n             | 4°C         | -                  | -           | -               | -             | Bo                    | Tris EDTA (pH8)                        |   | 90°C        | 30m             |
|     |                         | 10%Fo                     | A few days (clinical specimen) | P         | 1/50                | o/n             | 4°C         | -                  | -           | -               | -             | AC                    | Target Retrieval Solution ( Dako)      |   | 121°C       | 20m             |
| 182 | Pax6                    | 10%Fo                     | ∞                              | P         | 1/2500              | 60m             | RT          | -                  | -           | -               | -             | MW                    | Citrate BS (pH9)                       |   | -           | 10m             |
| 183 | PCNA                    | 10%Fo                     | ∞                              | P         | 1/1000              | o/n             | 4°C         | -                  | -           | -               | -             | MW                    | Citrate BS                             |   | -           | 5m              |
|     |                         | MD                        | -                              | P         | 1/200~400           | o/n             | 4°C         | -                  | -           | -               | -             | MW                    | Citrate BS                             |   | -           | 15m             |
|     |                         | 10%Fo                     | ∞                              | P         | 1/200; 1/400        | o/n             | 4°C         | -                  | -           | -               | -             | BO                    | Citrate BS                             |   | 95°C        | 40m             |
|     |                         | 10%Fo                     | 3d                             | P         | 1/2000              | o/n             | 4°C         | -                  | -           | -               | -             | MW                    | BS (1% Zinc sulfate)                   |   | 98°C        | 18m             |
|     |                         | 10%Fo                     | 3~7d                           | P         | 1/500               | 60m             | RT          | -                  | -           | -               | -             | Bo                    | DW                                     |   | -           | -               |
|     |                         | 10%Fo                     | 3~7d                           | P         | 1/500               | 60m             | RT          | -                  | -           | -               | -             | MW                    | Citrate BS                             |   | -           | -               |
|     |                         | 10%Fo                     | -                              | P         | 1/1000              | o/n             | 4°C         | -                  | -           | -               | -             | MW (2N HCL)           | DW                                     |   | 100°C       | 30m (After)     |
|     |                         | 10%Fo                     | 48h                            | P         | 1/20000~30000       | 60m             | RT          | -                  | -           | -               | -             | AC                    | Citrate BS                             |   | 121°C       | 3m              |
|     |                         | 10%Fo                     | 1 y                            | P         | 1/100~200           | 30m             | RT          | -                  | -           | -               | -             | MW                    | DW                                     |   | -           | 5m              |
|     |                         | 10%Fo                     | -                              | P         | 1/100; 1/50         | 30m; o/n        | 4°C         | -                  | -           | -               | -             | MW                    | Citrate BS                             |   | -           | 15m             |
|     |                         | 10%Fo                     | o/n                            | P         | 1/200               | 60m             | RT          | -                  | -           | -               | -             | AC 121°C 15           | Citrate BS (pH6), DW                   |   | 121°C       | 15m             |
|     |                         | 10%Fo                     | 24h                            | P         | 1/200~400           | 30m             | RT          | -                  | -           | -               | -             | BO                    | Target Retrieval Solution ( Dako)      |   | 100°C       | 20m             |
|     |                         | 10%Fo                     | w                              | P         | 1/50~1/100          | o/n             | 4°C         | -                  | -           | -               | -             | AC                    | Citrate BS                             |   | -           | 20m             |

Supplementary Table 12-3 Immunological properties of primary antibodies and IHC staining conditions

| No.                    | Antibody                                        | Secondary antibody                                  |                                                                                                             |                   |                |             |                 | Chromogenic substrate |                 | Photo. No. |
|------------------------|-------------------------------------------------|-----------------------------------------------------|-------------------------------------------------------------------------------------------------------------|-------------------|----------------|-------------|-----------------|-----------------------|-----------------|------------|
|                        |                                                 | Kit product                                         | Product                                                                                                     | Supplier          | Catalog Number | Temperature | Incubation time | Reagent               | Incubation time |            |
| 168                    | Neurofilament                                   | Envision                                            | EnVision™+ Dual Link System-HRP                                                                             | Dako              | K4061          | 37°C        | 30m             | DAB                   | 1~2m            |            |
|                        |                                                 | Envision+                                           | EnVision+ System-HRP Labelled Polymer Anti-mouse                                                            | Dako              | K4001          | RT          | 30m             | DAB                   | 3m              | Photo. 171 |
|                        |                                                 | Envision                                            | EnVision+ System- HRP Labelled Polymer                                                                      | Dako              | K4000          | 37°C        | 30m             | DAB                   | 2m              |            |
|                        |                                                 | Envision                                            | EnVision+ System- HRP Labelled Polymer                                                                      | Dako              | K4000          | RT          | 30m             | DAB                   | -               |            |
|                        |                                                 | LSAB                                                | Polyclonal Rabbit Anti-Mouse Immunoglobulins, Biotinylated affinity-isolated F(ab')2                        | Dako              | E0413          | RT          | 30m             | DAB                   | 5m              |            |
|                        |                                                 | Envision                                            | EnVision+ System- HRP Labelled Polymer                                                                      | Dako              | K4000          | RT          | 30m             | DAB                   | -               |            |
|                        |                                                 | LSAB                                                | Universal LSAB2 Kit/HRP, Rabbit/Mouse                                                                       | Dako              | K0675          | RT          | 10m             | DAB                   | ~2m             |            |
|                        |                                                 | Envision                                            | EnVision™+ Dual Link System-HRP                                                                             | Dako              | K6043          | RT          | 30m             | DAB                   | 2m              | Photo. 172 |
|                        |                                                 | Histofine Simple Stain                              | Histofine® Simple Stain™ Rat MAX-PO ( MULTI )                                                               | Nichirei          | 714191         | RT          | 30m             | DAB                   | 1~5m            |            |
| Envision               | EnVision™+ Dual Link System-HRP                 | Dako                                                | K4063                                                                                                       | RT                | 30m            | -           | 1m              |                       |                 |            |
| Histofine Simple Stain | Histofine® Simple Stain™ Rat MAX-PO ( MULTI ) ; | Nichirei                                            | 714191; 724152                                                                                              | RT                | 30m            | DAB         | 10m             |                       |                 |            |
| 169                    | Neurofilament 200                               | Elite ABC                                           | VECTASTAIN Elite ABC Kit (Mouse IgG)                                                                        | Vector Labs       | PK-6102        | RT          | 30m             | DAB                   | 5m              |            |
| 170                    | Neurofilament L                                 | Envision                                            | EnVision+ System- HRP Labelled Polymer Anti-Rabbit                                                          | Dako              | K4002          | RT          | 30m             | -                     | 1m              |            |
| 171                    | Neuron-Specific Enolase                         | Envision                                            | EnVision+ System- HRP Labelled Polymer                                                                      | Dako              | K1390          | RT          | 1h              | DAB                   | 3m              |            |
|                        |                                                 | Envision                                            | EnVision™+ Dual Link System-HRP                                                                             | Dako              | K4061          | 37°C        | 30m             | DAB                   | 1~2m            |            |
|                        |                                                 | Histofine Simple Stain                              | Histofine® Simple Stain™ Rat MAX PO ( R )                                                                   | Nichirei          | 414181         | RT          | 30m             | DAB                   | 4m              |            |
|                        |                                                 | Histofine Simple Stain                              | Histofine® Simple Stain™ Rat MAX PO ( R )                                                                   | Nichirei          | 414181         | RT          | 30m             | DAB                   | 4m              |            |
| 172                    | NG2                                             | LSAB                                                | Universal LSAB2 Kit/HRP, Rabbit/Mouse                                                                       | Dako              | K0679          | RT          | 30m             | DAB                   | 3m              |            |
| 173                    | 3-Nitrotyrosine                                 | Histofine Simple Stain                              | Histofine® Simple Stain™ Rat MAX PO (MULTI)                                                                 | Nichirei          | 414191F        | RT          | 30m             | DAB                   | -               |            |
| 174                    | OCT3/4                                          | Histofine Simple Stain                              | Histofine® Simple Stain™ Rat MAX PO (M)                                                                     | Nichirei          | 414171         | RT          | 30m             | DAB                   | 4m              |            |
| 175                    | Olig2                                           | LSAB                                                | Universal LSAB2 Kit/HRP, Rabbit/Mouse                                                                       | Dako              | K0679          | RT          | 30m             | DAB                   | 2m              |            |
|                        |                                                 | Envision                                            | EnVision+ System- HRP Labelled Polymer Anti-Rabbit                                                          | Dako              | K4002          | RT          | 30m             | DAB                   | -               |            |
|                        |                                                 | Histofine Simple Stain                              | Histofine® Simple Stain™ Rat MAX-PO ( R )                                                                   | Nichirei          | 714181         | RT          | 30m             | DAB                   | 10m             |            |
|                        |                                                 | Envision                                            | EnVision+ System- HRP Labelled Polymer Anti-Rabbit                                                          | Dako              | K4002          | RT          | 30m             | -                     | 10m             | Photo. 173 |
|                        |                                                 | Histofine Simple Stain                              | Histofine® Simple Stain™ Rat MAX PO (MULTI)                                                                 | Nichirei          | 414191         | RT          | 30m             | DAB                   | 10m             |            |
|                        |                                                 | Alexa Fluor                                         | F(ab')2-Goat anti-Rabbit IgG (H+L) Secondary Antibody, Alexa Fluor® 555 conjugate                           | Life Technologies | A-21430        | RT          | 30m             | -                     | -               |            |
|                        |                                                 | Histofine Simple Stain                              | Histofine® Simple Stain™ Mouse MAX PO (R)                                                                   | Nichirei          | 414341         | RT          | 30m             | DAB                   | 15s             | Photo. 174 |
| 176                    | Osteocalcin                                     | Envision                                            | EnVision+ System- HRP Labelled Polymer                                                                      | Dako              | K1390          | -           | 20m             | DAB                   | 45s             | Photo. 175 |
|                        |                                                 | Histofine Simple Stain                              | Histofine® Simple Stain™ Rat MAX PO (MULTI)                                                                 | Nichirei          | 414191         | RT          | 30m             | DAB                   | 30s             |            |
|                        |                                                 | Histofine Simple Stain                              | Histofine® Simple Stain™ Rat MAX PO (M)                                                                     | Nichirei          | 414171         | RT          | 30m             | DAB                   | 10m             | Photo. 176 |
| 177                    | Osterix                                         | Envision                                            | EnVision+ System- HRP Labelled Polymer                                                                      | Dako              | K1390          | -           | 20m             | DAB                   | 1m30s           | Photo. 177 |
|                        |                                                 | Envision                                            | EnVision+ System- HRP Labelled Polymer Anti-Rabbit                                                          | Dako              | K4002          | 37°C        | 30m             | DAB                   | 2m              |            |
|                        |                                                 | Histofine Simple Stain                              | Histofine® Simple Stain™ Rat MAX PO (MULTI)                                                                 | Nichirei          | 414191F        | -           | -               | -                     | -               |            |
|                        |                                                 | Histofine Simple Stain                              | Histofine® Simple Stain™ Rat MAX PO (MULTI)                                                                 | Nichirei          | 414191         | RT          | 30m             | DAB                   | 30s             |            |
| 178                    | p62/SQSTM1                                      | Histofine Simple Stain                              | Histofine® Simple Stain™ Rat MAX PO (MULTI)                                                                 | Nichirei          | 414191F        | -           | -               | -                     | -               |            |
| 179                    | Paraoxonase 2 (PON2)                            | Histofine Simple Stain                              | Histofine® Simple Stain™ Rat MAX PO (MULTI)                                                                 | Nichirei          | 414191F        | -           | -               | -                     | -               |            |
| 180                    | Parathyroid Hormone                             | Histofine Simple Stain                              | Histofine® Simple Stain™ Rat MAX PO (MULTI)                                                                 | Nichirei          | 414191         | RT          | 30m             | DAB                   | 8m              |            |
| 181                    | Pax5                                            | Envision                                            | EnVision+ System- HRP Labelled Polymer Anti-Rabbit                                                          | Dako              | K4002          | RT          | 30m             | DAB                   | -               | Photo. 178 |
|                        |                                                 | Envision+                                           | Envision+ System-HRP Labelled Polymer Anti-Rabbit                                                           | Dako              | K4003          | RT          | 30m             | DAB                   | 3m              | Photo. 179 |
| 182                    | Pax6                                            | Envision                                            | EnVision+ System- HRP Labelled Polymer Anti-Rabbit                                                          | Dako              | K4002          | RT          | 30m             | -                     | 10m             |            |
| 183                    | PCNA                                            | Envision                                            | EnVision+ System- HRP Labelled Polymer                                                                      | Dako              | K4000          | 37°C        | 30m             | DAB                   | 2m              |            |
|                        |                                                 | Histofine Simple Stain                              | Histofine® Simple Stain™ Rat MAX PO (MULTI)                                                                 | Nichirei          | 414191         | RT          | 30m             | DAB                   | 1~2m            |            |
|                        |                                                 | Envision                                            | EnVision™+ Dual Link System-HRP                                                                             | Dako              | K4063          | RT          | 60m             | DAB                   | 2m              |            |
|                        |                                                 | LSAB                                                | Universal LSAB2 Kit/HRP, Rabbit/Mouse                                                                       | Dako              | K0679          | RT          | 30m             | DAB                   | 1m              |            |
|                        |                                                 | LSAB                                                | Polyclonal Rabbit Anti-Mouse Immunoglobulins, Biotinylated affinity-isolated F(ab')2                        | Dako              | E0413          | RT          | 30m             | DAB                   | 5m              |            |
|                        |                                                 | LSAB                                                | Polyclonal Rabbit Anti-Mouse Immunoglobulins, Biotinylated affinity-isolated F(ab')2                        | Dako              | E0413          | RT          | 30m             | DAB                   | 5m              |            |
|                        |                                                 | Envision                                            | EnVision+ System- HRP Labelled Polymer                                                                      | Dako              | K4000          | RT          | 30m             | DAB                   | -               |            |
|                        |                                                 | Histofine Simple Stain, Bio/ninylate immunoglobulin | EnVision+ System- HRP Labelled Polymer Anti-Rabbit; Histofine® Simple Stain™ Rat MAX PO (MULTI)PO ( MULTI ) | Dako, Nichirei    | K4002; 414191  | RT          | 30m             | DAB                   | 1m              |            |
|                        |                                                 | Histofine Simple Stain                              | Histofine® Simple Stain™ Rat MAX-PO ( MULTI )                                                               | Nichirei          | 714191         | RT          | 30m             | DAB                   | 1~5m            |            |
|                        |                                                 | -                                                   | -                                                                                                           | -                 | -              | -           | -               | -                     | -               |            |
|                        |                                                 | Histofine Simple Stain                              | -                                                                                                           | Nichirei          | -              | -           | -               | DAB                   | -               |            |
|                        |                                                 | Envision                                            | EnVision™+ Dual Link System-HRP                                                                             | Dako              | K4061          | 37°C        | 30m             | DAB                   | 1~2m            |            |
|                        |                                                 | LSAB                                                | Universal LSAB2 Kit/HRP, Rabbit/Mouse                                                                       | Dako              | K0675          | RT          | 15m             | DAB                   | 5m              |            |



Supplementary Table 13-2 Immunological properties of primary antibodies and IHC staining conditions

| No.   | Antibody                                     | Primary antibody |              |           |           |                 |             |                    |             |                 |                                        |                   |                                         |             |                 |
|-------|----------------------------------------------|------------------|--------------|-----------|-----------|-----------------|-------------|--------------------|-------------|-----------------|----------------------------------------|-------------------|-----------------------------------------|-------------|-----------------|
|       |                                              | Fixing solution  | Fixing time  | Embedding | Dilution  | Incubation time | Temperature | Protease treatment |             |                 |                                        | Antigen retrieval |                                         |             |                 |
|       |                                              |                  |              |           |           |                 |             | Enzyme             | Temperature | Incubation time | Concentration                          | Method            | Solution                                | Temperature | Incubation time |
| 183   | PCNA                                         | 10%Fo            | 24h          | P         | 1/500     | 60m             | RT          | -                  | -           | -               | -                                      | MW                | Citrate BS                              | 95°C        | 20m             |
|       |                                              | 10%Fo            | ∞            | P         | 1/500     | 60m             | RT          | -                  | -           | -               | -                                      | -                 | -                                       | -           | -               |
|       |                                              | 10%Fo            | -            | P         | 1/3000    | 30m             | RT          | -                  | -           | -               | -                                      | PC                | Target Retrieval Solution ( pH9, Dako)  | 125°C       | 0.5m            |
|       |                                              | 10%Fo            | -            | P         | 1/6000    | 30m             | RT          | -                  | -           | -               | -                                      | PC                | Target Retrieval Solution ( pH9, Dako)  | 125°C       | 0.5m            |
|       |                                              | 10%Fo            | -            | P         | 1/100     | 30m             | RT          | -                  | -           | -               | -                                      | -                 | -                                       | -           | -               |
|       |                                              | 10%Fo            | -            | P         | 1/500     | o/n             | 4°C         | -                  | -           | -               | -                                      | -                 | -                                       | -           | -               |
|       |                                              | 10%Fo            | 1d~1w        | P         | 1/800     | 60m             | RT          | -                  | -           | -               | -                                      | MW                | DW                                      | -           | 6m              |
|       |                                              | 10%Fo            | 1w           | P         | 1/100     | o/n             | 4°C         | -                  | -           | -               | -                                      | AC                | Citrate BS                              | 95°C        | 10m             |
|       |                                              | 10%Fo            | 5d~1y        | P         | 1/1000    | 60m             | RT          | -                  | -           | -               | -                                      | MW/AC             | Citrate BS                              | 120°C       | 20m             |
|       |                                              | 10%Fo            | -            | P         | 1/800     | o/n             | 4°C         | -                  | -           | -               | -                                      | MW                | Target Retrieval Solution ( pH6, Dako); | 100°C       | 15m             |
|       |                                              | 10%Fo            | o/n          | P         | 1/1000    | 60m             | RT          | -                  | -           | -               | -                                      | MW                | Citrate BS                              | 98°C        | 15m             |
|       |                                              | 4%PFA            | 24h          | P         | 1/200     | 60m             | 37°C        | -                  | -           | -               | -                                      | He                | CC2 (Roche)                             | 98°C        | 30m             |
|       |                                              | 10%Fo            | ∞            | P         | 1/6000    | 60m             | RT          | -                  | -           | -               | -                                      | PC                | Citrate BS                              | 125°C; 90°C | 30s; 5s         |
|       |                                              | 10%Fo            | w            | P         | 1/800     | 30m             | RT          | -                  | -           | -               | -                                      | Bo                | Citrate BS                              | 100°C       | 20m             |
| 10%Fo | 2d                                           | P                | 0.2 µg/mL    | 60m       | RT        | -               | -           | -                  | -           | MW              | Citrate BS                             | 500W              | 10m                                     |             |                 |
| 10%Fo | o/n                                          | P                | Ready to use | 30m       | RT        | -               | -           | -                  | -           | MV              | Target Retrieval Solution ( pH6, Dako) | -                 | 10m (After)                             |             |                 |
| 184   | PDX1                                         | 10%Fo            | o/n          | P         | 1/100     | o/n             | 4°C         | -                  | -           | -               | -                                      | PC                | Citrate BS                              | -           | 10m             |
| 185   | Perilipin 1                                  | 10%Fo            | -            | P         | 1/1000    | o/n             | 4°C         | -                  | -           | -               | -                                      | AC                | Target Retrieval Solution ( pH6, Dako)  | 121°C       | 15m             |
| 186   | PGP-9.5                                      | 10%Fo            | -            | P         | 1/100     | o/n             | 4°C         | -                  | -           | -               | -                                      | MW                | HistoVT One                             | -           | 15m             |
|       |                                              | 10%Fo            | 1w           | P         | 1/100     | 60m             | RT          | -                  | -           | -               | -                                      | AC                | Citrate BS                              | 121°C       | 10m             |
|       |                                              | 10%Fo            | ∞            | P         | 1/200     | 60m             | RT          | -                  | -           | -               | -                                      | -                 | -                                       | -           |                 |
| 187   | Phospho-histone H3                           | 10%Fo            | 4w           | P         | 1/100     | 60m             | RT          | -                  | -           | -               | -                                      | AC                | Citrate BS                              | 121°C       | 10m             |
|       |                                              | 10%Fo            | o/n          | P         | 1/300     | o/n             | 4°C         | -                  | -           | -               | -                                      | PC                | Citrate BS                              | -           | 10m             |
| 188   | Phospho-histone H3 (Ser10)                   | 10%Fo            | 1w           | P         | 1/200     | 60m             | RT          | -                  | -           | -               | -                                      | MW                | Citrate BS                              | 500W        | 20m             |
| 189   | Phospho-Met (Tyr1349)                        | 10%Fo            | 3d           | P         | 1/25      | 60m             | RT          | -                  | -           | -               | -                                      | MW                | Target Retrieval Solution pH9 ( Dako)   | 500W        | 20m             |
| 190   | Phospho-p44/42 MAPK (Erk1/2) (Thr202/Tyr204) | 10%Fo            | 1w           | P         | 0.5 µg/mL | 60m             | RT          | -                  | -           | -               | -                                      | MW                | Citrate BS                              | 500W        | 10m             |
| 191   | PLAP                                         | 10%Fo            | -            | P         | 1/100     | 30m             | RT          | -                  | -           | -               | -                                      | PC                | Target Retrieval Solution ( pH9, Dako)  | 125°C       | 0.5m            |
| 192   | PNAd Carbohydrate                            | 10%Fo            | -            | P         | 1/1000    | o/n             | 4°C         | -                  | -           | -               | -                                      | PC                | Target Retrieval Solution ( pH6, Dako)  | 125°C       | 0.5m            |
| 193   | PNMT                                         | 10%Fo            | -            | P         | 1/200     | o/n             | 4°C         | -                  | -           | -               | -                                      | ND                | -                                       | -           |                 |
| 194   | Podoplanin                                   | 10%Fo            | 1w           | P         | 1/200     | 60m             | RT          | -                  | -           | -               | -                                      | AC                | EDTA                                    | 121°C       | 5m              |
|       |                                              | 10%Fo            | ∞            | P         | 1/200     | 60m             | RT          | -                  | -           | -               | -                                      | -                 | -                                       | -           |                 |
|       |                                              | 10%Fo            | ∞            | P         | 1/100     | 60m             | RT          | -                  | -           | -               | -                                      | -                 | -                                       | -           |                 |
|       |                                              | 10%Fo            | -            | P         | 1/100     | 30m             | RT          | Proteinase K       | RT          | 5m              | Ready to use                           | -                 | -                                       | -           |                 |
| 195   | PPARα                                        | 10%Fo            | -            | P         | 1/250     | o/n             | 4°C         | -                  | -           | -               | -                                      | MW                | Citrate BS                              | -           | 15m             |
|       |                                              | 10%Fo            | >1w          | P         | 1/400     | o/n             | 4°C         | -                  | -           | -               | -                                      | AC                | Citrate BS                              | 121°C       | 15m             |
| 196   | PPARγ                                        | 10%Fo            | -            | P         | 1/250     | o/n             | 4°C         | -                  | -           | -               | -                                      | MW                | Citrate BS                              | -           | 15m             |
|       |                                              | 10%Fo            | ∞            | P         | 1/500     | 60m             | RT          | -                  | -           | -               | -                                      | -                 | -                                       |             |                 |
| 197   | PPARγ2                                       | 10%Fo            | -            | P         | 1/400     | o/n             | 4°C         | -                  | -           | -               | -                                      | MW                | Citrate BS                              | -           | 15m             |
|       |                                              | 10%Fo            | -            | P         | 1/100     | o/n             | 4°C         | -                  | -           | -               | -                                      | MW                | Citrate BS                              | -           | 15m             |
| 199   | Prohibitin                                   | 10%Fo            | -            | P         | 1/50      | o/n             | 4°C         | -                  | -           | -               | -                                      | MW                | HistoVT One                             | -           | 15m             |
|       |                                              | 10%Fo            | -            | P         | 1/50      | o/n             | 4°C         | -                  | -           | -               | -                                      | MW                | HistoVT One                             | -           | 15m             |
|       |                                              | 10%Fo            | 1d~1w        | P         | 1/500     | 60m             | RT          | -                  | -           | -               | -                                      | MW                | -                                       | -           | 6m              |
|       |                                              | 10%Fo            | -            | P         | 1/50      | o/n             | 4°C         | -                  | -           | -               | -                                      | MW                | HistoVT One                             | -           | 15m             |
|       |                                              | 10%Fo            | -            | P         | 1/100     | o/n             | 4°C         | -                  | -           | -               | -                                      | MW                | HistoVT One                             | -           | 15m             |
| 200   | Prolactin                                    | 10%Fo            | ~1y          | P         | 1/1000    | 2h              | 37°C        | -                  | -           | -               | -                                      | -                 | -                                       | -           |                 |
| 201   | Prosulfactant Protein C                      | 10%Fo            | -            | P         | 1/1000    | o/n             | 4°C         | -                  | -           | -               | -                                      | AC                | Target Retrieval Solution ( pH6, Dako)  | 121°C       | 20m             |
| 202   | Pulmonary Surfactant-associated Protein C    | 10%Fo            | 4w           | P         | 1/100~300 | 60m;0 o/n       | RT; 4°C     | Proteinase         | RT          | 5-10m           | 0.0005                                 | -                 | -                                       | -           |                 |
| 203   | Pulmonary Surfactant-associated Protein D    | 10%Fo            | -            | P         | 1/20      | o/n             | 4°C         | Proteinase K       | RT          | 5m              | Ready to use <sup>x2</sup>             | -                 | -                                       | -           |                 |
| 204   | RASSF1                                       | 10%Fo            | 24h          | P         | 1/200     | o/n             | 4°C         | -                  | -           | -               | -                                      | -                 | -                                       | -           |                 |

Supplementary Table 13-3 Immunological properties of primary antibodies and IHC staining conditions

| No.                    | Antibody                                     | Secondary antibody          |                                                                                               |                   |                |             |                 | Chromogenic substrate |                 | Photo. No. |
|------------------------|----------------------------------------------|-----------------------------|-----------------------------------------------------------------------------------------------|-------------------|----------------|-------------|-----------------|-----------------------|-----------------|------------|
|                        |                                              | Kit product                 | Product                                                                                       | Supplier          | Catalog Number | Temperature | Incubation time | Reagent               | Incubation time |            |
| 183                    | PCNA                                         | Histofine Simple Stain      | Histofine® Simple Stain™ Rat MAX-PO ( M )                                                     | Nichirei          | 714171         | RT          | 10m             | DAB                   | 10m             |            |
|                        |                                              | Histofine Simple Stain      | Histofine® Simple Stain™ Rat MAX PO (MULTI)                                                   | Nichirei          | 414191         | RT          | 30m             | DAB                   | 30s             |            |
|                        |                                              | Histofine Simple Stain      | Histofine® Simple Stain™ Rat MAX PO (M)                                                       | Nichirei          | 414171         | RT          | 30m             | DAB                   | 4m              |            |
|                        |                                              | Histofine Simple Stain      | Histofine® Simple Stain™ Rat MAX PO (M)                                                       | Nichirei          | 414171         | RT          | 30m             | DAB                   | 4m              |            |
|                        |                                              | Histofine Simple Stain      | Histofine® Simple Stain™ Rat MAX PO (M)                                                       | Nichirei          | 414171         | RT          | 30m             | DAB                   | 4m              |            |
|                        |                                              | Histofine Simple Stain      | Histofine® Simple Stain™ Rat MAX PO (M)                                                       | Nichirei          | 414171         | RT          | 30m             | DAB                   | 90s             |            |
|                        |                                              | Histofine Simple Stain      | Histofine® Simple Stain™ Rat MAX-PO ( MULTI ) ;                                               | Nichirei          | 714191; 724132 | RT          | 30m             | DAB                   | 10m             | Photo. 180 |
|                        |                                              | Histofine Simple Stain      | Histofine® Simple Stain™ MAX-PO(M)                                                            | Nichirei          | 424131         | RT          | 30m             | DAB                   | 45s             |            |
|                        |                                              | LSAB                        | Universal LSAB2 Kit/HRP, Rabbit/Mouse                                                         | Dako              | K0609          | RT          | 10m             | DAB                   | 1m              |            |
|                        |                                              | Envision                    | Envision+ System-HRP Labelled Polymer Anti-mouse                                              | Dako              | K4006          | RT          | 1h              | DAB                   | -               |            |
|                        |                                              | Histofine Simple Stain      | Histofine® Simple Stain™ Rat MAX PO (MULTI)                                                   | Nichirei          | 414191         | RT          | 30m             | DAB                   | 3m              |            |
|                        |                                              | Histofine Simple Stain      | Histofine® Simple Stain™ Rat MAX PO (MULTI)                                                   | Nichirei          | 414191         | 37°C        | 30m             | DAB                   | 8m              |            |
|                        |                                              | Histofine Simple SAB-PO(M)  | Histofine® SAB-PO ( M )                                                                       | Nichirei          | 424022         | RT          | 10m             | DAB                   | 1m              |            |
| Histofine Simple Stain | Histofine® Simple Stain™ Rat MAX PO (MULTI)  | Nichirei                    | 414191                                                                                        | RT                | 30m            | DAB         | 3m              |                       |                 |            |
| Histofine Simple Stain | Histofine® MOUSESTAIN KIT*                   | Nichirei                    | 414321                                                                                        | RT                | 30m            | DAB         | 5m              |                       |                 |            |
| Histofine Simple Stain | Histofine® Simple Stain™ Mouse MAX PO (R)    | Nichirei                    | 414341                                                                                        | RT                | 10m            | DAB         | 10m             | Photo. 181            |                 |            |
| 184                    | PDX1                                         | Elite ABC                   | VECTASTAIN Elite ABC Kit (Rabbit IgG)                                                         | Vector Labs       | PK-6101        | RT          | 30m             | DAB                   | 2m              | Photo. 182 |
| 185                    | Perilipin 1                                  | ABC                         | VECTASTAIN ABC Kit (Guinea Pig IgG )                                                          | Vector Labs       | PK-4007        | RT          | 30m             | DAB                   | 4~5m            | Photo. 183 |
| 186                    | PGP-9.5                                      | Histofine Simple Stain      | Histofine® Simple Stain™ Rat MAX PO (MULTI)                                                   | Nichirei          | 414191F        | -           | -               | -                     | -               |            |
|                        |                                              | Histofine Simple Stain      | Histofine® Simple Stain™ Rat MAX PO (R)                                                       | Nichirei          | 414181         | RT          | 30m             | DAB                   | 10m             | Photo. 184 |
|                        |                                              | Histofine Simple Stain      | Histofine® Simple Stain™ Rat MAX PO (R)                                                       | Nichirei          | 414181         | RT          | 30m             | DAB                   | -               |            |
| 187                    | Phospho-histone H3                           | Histofine Simple Stain      | Histofine® Simple Stain™ Rat MAX PO (R)                                                       | Nichirei          | 414181         | RT          | 30m             | DAB                   | 10m             | Photo. 185 |
|                        |                                              | Elite ABC                   | VECTASTAIN Elite ABC Kit (Rabbit IgG)                                                         | Vector Labs       | PK-6101        | RT          | 30m             | DAB                   | 1m30s           |            |
| 188                    | Phospho-histone H3 (Ser10)                   | Envision                    | EnVision+ System- HRP Labelled Polymer Anti-Rabbit                                            | Dako              | K4002          | RT          | 30m             | DAB                   | 2m              | Photo. 186 |
| 189                    | Phospho-Met (Tyr1349)                        | Envision                    | EnVision+ System- HRP Labelled Polymer Anti-Rabbit                                            | Dako              | K4002          | RT          | 30m             | DAB                   | 5m              |            |
| 190                    | Phospho-p44/42 MAPK (Erk1/2) (Thr202/Tyr204) | Histofine Simple Stain      | Histofine® Simple Stain™ Mouse MAX PO (R)                                                     | Nichirei          | 414341         | RT          | 30m             | DAB                   | 5m              |            |
| 191                    | PLAP                                         | Histofine Simple Stain      | Histofine® Simple Stain™ Rat MAX PO (M)                                                       | Nichirei          | 414171         | RT          | 30m             | DAB                   | 4m              |            |
| 192                    | PNAd Carbohydrate                            | Histofine Simple Stain      | Histofine® Simple Stain™ MAX-PO(M)                                                            | Nichirei          | 424131         | RT          | 30m             | DAB                   | 2m              |            |
| 193                    | PNMT                                         | Biotinylated immunoglobulin | Biotinylated Rabbit Anti-Mouse Immunoglobulins; Streptavidin, Alkaline Phosphatase conjugated | Dako, Vector Labs | E0464; SA-5100 | RT          | 30m             | NF                    | -               | Photo. 187 |
| 194                    | Podoplanin                                   | Histofine Simple Stain      | Histofine® Simple Stain™ Rat MAX PO (M)                                                       | Nichirei          | 414171         | RT          | 30m             | DAB                   | 10m             |            |
|                        |                                              | Envision                    | EnVision+ System- HRP Labelled Polymer                                                        | Dako              | K4000          | RT          | 30m             | -                     | 3m              |            |
|                        |                                              | Histofine Simple Stain      | Histofine® Simple Stain™ Rat MAX PO (MULTI)                                                   | Nichirei          | 414191         | RT          | 30m             | DAB                   | 30s             | Photo. 188 |
|                        |                                              | Histofine Simple Stain      | Histofine® Simple Stain™ Rat MAX PO (M)                                                       | Nichirei          | 414171         | RT          | 30m             | DAB                   | 4m              |            |
| 195                    | PPARα                                        | SAB                         | Histofine® SimpleStain SAB-PO(MULTI)                                                          | Nichirei          | 424043         | -           | -               | -                     | -               |            |
| 196                    | PPARγ                                        | ABC                         | VECTASTAIN ABC Kit (Rabbit IgG )                                                              | Vector Labs       | PK-4001        | RT          | 30m             | DAB                   | 1m30s           | Photo. 189 |
|                        |                                              | SAB                         | Histofine® SimpleStain SAB-PO(MULTI)                                                          | Nichirei          | 424043         | -           | -               | -                     | -               |            |
| 197                    | PPARγ2                                       | Histofine Simple Stain      | Histofine® Simple Stain™ Mouse MAX PO (R)                                                     | Nichirei          | 414341         | RT          | 30m             | DAB                   | 30s             | Photo. 190 |
| 198                    | Progesterone Receptor                        | Histofine Simple Stain      | Histofine® SimpleStain SAB-PO(MULTI)                                                          | Nichirei          | 424043         | -           | -               | -                     | -               |            |
|                        |                                              | Histofine Simple Stain      | Histofine® Simple Stain™ Rat MAX PO (MULTI)                                                   | Nichirei          | 414191         | RT          | 30m             | DAB                   | 30s             |            |
|                        |                                              | SAB                         | Histofine® SimpleStain SAB-PO(MULTI)                                                          | Nichirei          | 424043         | -           | -               | -                     | -               |            |
| 199                    | Prohibitin                                   | Histofine Simple Stain      | Histofine® Simple Stain™ Rat MAX PO (MULTI)                                                   | Nichirei          | 414191F        | RT          | 30m             | DAB                   | 3m              |            |
|                        |                                              | Histofine Simple Stain      | Histofine® Simple Stain™ Rat MAX PO (MULTI)                                                   | Nichirei          | 414191F        | -           | -               | -                     | -               |            |
|                        |                                              | Histofine Simple Stain      | Histofine® Simple Stain™ MAX-PO ( MULTI )                                                     | Nichirei          | 724152         | RT          | 30m             | DAB                   | 10m             |            |
|                        |                                              | Histofine Simple Stain      | Histofine® Simple Stain™ Rat MAX PO (MULTI)                                                   | Nichirei          | 414191F        | RT          | 30m             | DAB                   | 3m30s           |            |
|                        |                                              | Histofine Simple Stain      | Histofine® Simple Stain™ Rat MAX PO (MULTI)                                                   | Nichirei          | 414191F        | -           | -               | -                     | -               |            |
| 200                    | Prolactin                                    | Histofine Simple Stain      | Histofine® Simple Stain™ Rat MAX PO (MULTI)                                                   | Nichirei          | 414191         | 37°C        | -               | DAB                   | 30s~1m          | Photo. 191 |
| 201                    | Prosurfactant Protein C                      | Envision                    | Histofine® Simple Stain™ Rat MAX PO (MULTI)                                                   | Nichirei          | 414191         | -           | 30m             | DAB                   | 4m              | Photo. 192 |
| 202                    | Pulmonary Surfactant-associated Protein C    | Histofine Simple Stain      | Histofine® Simple Stain™ Rat MAX-PO ( MULTI ) ;<br>Histofine® Simple Stain™ MouseMAX-PO ( R ) | Nichirei          | 714191; 714341 | RT          | 30m             | DAB                   | 1~5m            |            |
| 203                    | Pulmonary Surfactant-associated Protein D    | Histofine Simple Stain      | Histofine® Simple Stain™ Rat MAX PO (R)                                                       | Nichirei          | 414181         | RT          | 30m             | DAB                   | 1.5m            | Photo. 193 |
| 204                    | RASSF1                                       | Histofine Simple Stain      | Histofine® Simple Stain™ Rat MAX PO (G)                                                       | Nichirei          | 414331         | RT          | 60m             | DAB                   | -               | Photo. 194 |







Supplementary Table 14-2 Immunological properties of primary antibodies and IHC staining conditions

| No.   | Antibody                                            | Primary antibody          |                                |           |                       |                 |             |                    |             |                 |               |                   |          |                                          |                                        |       |             |     |
|-------|-----------------------------------------------------|---------------------------|--------------------------------|-----------|-----------------------|-----------------|-------------|--------------------|-------------|-----------------|---------------|-------------------|----------|------------------------------------------|----------------------------------------|-------|-------------|-----|
|       |                                                     | Fixing solution           | Fixing time                    | Embedding | Dilution              | Incubation time | Temperature | Protease treatment |             |                 |               | Antigen retrieval |          |                                          |                                        |       |             |     |
|       |                                                     |                           |                                |           |                       |                 |             | Enzyme             | Temperature | Incubation time | Concentration | Method            | Solution | Temperature                              | Incubation time                        |       |             |     |
| 205   | Rat Mast Cell Protease 2                            | 10%Fo                     | 1w                             | P         | 1/100                 | 60m             | RT          | -                  | -           | -               | -             | -                 | -        | -                                        | -                                      | -     | -           |     |
| 206   | Rat MFH                                             | 10%Fo                     | ∞                              | P         | 1/50                  | 60m             | RT          | -                  | -           | -               | -             | -                 | Bo       | BS                                       | -                                      | -     | 20m         |     |
| 207   | Renin                                               | 10%Fo                     | 1w                             | P         | 1/500                 | 60m             | RT          | -                  | -           | -               | -             | -                 | -        | -                                        | -                                      | -     | -           |     |
| 208   | Retinal Pigment Epithelium-specific 65 kDa Protein  | MD                        | -                              | P         | 1/500                 | o/n             | 4°C         | -                  | -           | -               | -             | -                 | MW       | Citrate BS                               | -                                      | -     | 10m         |     |
| 209   | Retinoic Acid Receptor β                            | 10%Fo                     | 24h                            | P         | 1/50                  | o/n             | 4°C         | -                  | -           | -               | -             | -                 | PC       | Citrate BS                               | -                                      | -     | 10m         |     |
| 210   | Rhodopsin                                           | MD                        | -                              | P         | 1/2000                | o/n             | 4°C         | -                  | -           | -               | -             | -                 | PC       | EDTA (pH8)                               | -                                      | -     | 2m          |     |
| 211   | S100                                                | 10%Fo                     | 48h                            | P         | 1/100~1000            | 60m             | RT          | -                  | -           | -               | -             | -                 | AC       | Target Retrieval Solution ( Dako)        | 121°C                                  | -     | 3m          |     |
|       |                                                     | 10%Fo                     | -                              | P         | 1/2                   | o/n             | 4°C         | -                  | -           | -               | -             | -                 | Bo       | Citrate BS                               | -                                      | -     | 10m         |     |
|       |                                                     | 10%Fo                     | 24h                            | P         | Ready to use          | 40m             | 37°C        | -                  | -           | -               | -             | -                 | -        | -                                        | -                                      | -     | -           | -   |
|       |                                                     | 10%Fo                     | A few days (clinical specimen) | P         | Ready to use          | o/n             | 4°C         | -                  | -           | -               | -             | -                 | -        | -                                        | -                                      | -     | -           | -   |
|       |                                                     | 10%Fo                     | 24h                            | P; F      | Ready to use          | 60m             | RT          | -                  | -           | -               | -             | -                 | -        | -                                        | -                                      | -     | -           | -   |
|       |                                                     | 10%Fo                     | ∞                              | P         | Ready to use          | 60m             | RT          | -                  | -           | -               | -             | -                 | -        | -                                        | -                                      | -     | -           | -   |
|       |                                                     | 10%Fo                     | ∞                              | P         | Ready to use          | o/n             | 4°C         | -                  | -           | -               | -             | -                 | -        | -                                        | -                                      | -     | -           | -   |
| 212   | S100a                                               | 10%Fo                     | 3~7d                           | P         | 1/2000                | 60m             | RT          | -                  | -           | -               | -             | -                 | -        | -                                        | -                                      | -     | -           |     |
| 213   | Sall4                                               | 10%Fo                     | o/n                            | P         | 1/800                 | 2h              | RT          | -                  | -           | -               | -             | -                 | AC       | Citrate BS                               | 121°C                                  | -     | 10m         |     |
|       |                                                     | 10%Fo; Testis:FSA → 10%Fo | 5m                             | P         | 1/10                  | 60m             | RT          | -                  | -           | -               | -             | -                 | -        | -                                        | -                                      | -     | -           |     |
| 214   | Sarcoplasmic/Endoplasmic Reticulum Calcium ATPase 2 | 10%Fo                     | 3~7d                           | P         | 1/50000               | 60m             | RT          | Proteinase K       | RT          | 5m              | Ready to use  | -                 | -        | -                                        | -                                      | -     | -           |     |
|       |                                                     | 10%Fo                     | -                              | P         | 1/1000                | o/n             | 4°C         | Trypsin            | 37°C        | 30m             | -             | -                 | -        | -                                        | -                                      | -     | -           |     |
| 215   | Schwann Cell/Peripheral Myelin                      | 10%Fo                     | ∞                              | P         | 1/500                 | o/n             | 4°C         | -                  | -           | -               | -             | -                 | Bo       | PT link (pH9)                            | 95°C                                   | -     | 20m         |     |
|       |                                                     | 10%Fo                     | 24h                            | P; F      | 1/1000                | 60m             | RT          | Proteinase K       | RT          | 10m             | 100 ug/ml     | -                 | -        | -                                        | -                                      | -     | -           |     |
|       |                                                     | 10%Fo                     | ∞                              | P         | 1/100000              | 60m             | RT          | -                  | -           | -               | -             | -                 | -        | -                                        | -                                      | -     | -           |     |
| 216   | Slow Skeletal Myosin Heavy Chain                    | 4%PFA                     | 1w                             | P         | 1/5000                | 20m             | RT          | -                  | -           | -               | -             | -                 | PC       | Tris BS (10mmol/L) + EDTA (1mmol/L)(pH9) | 120°C                                  | -     | 10m         |     |
| 217   | Somatostatin                                        | 10%Fo                     | -                              | P         | 1/2000                | o/n             | 4°C         | -                  | -           | -               | -             | -                 | PC       | Target Retrieval Solution ( pH6, Dako)   | 125°C                                  | -     | 0.5m        |     |
|       |                                                     | 10%Fo                     | -                              | P         | 1/2000                | o/n             | 4°C         | -                  | -           | -               | -             | -                 | PC       | Target Retrieval Solution ( pH6, Dako)   | 125°C                                  | -     | 0.5m        |     |
| 218   | Steroidogenic Factor 1                              | 10%Fo                     | 10d                            | P         | 1/1000                | o/n             | 4°C         | -                  | -           | -               | -             | -                 | AC       | Target Retrieval Solution ( pH6, Dako)   | 121°C                                  | -     | 15m         |     |
| 219   | Stromal Cell-derived Factor 1/CXCL12                | 10%Fo                     | w                              | P         | 1/40                  | o/n             | 4°C         | -                  | -           | -               | -             | -                 | MV       | Target Retrieval Solution ( pH6, Dako)   | -                                      | -     | 15m (After) |     |
| 220   | Synaptophysin                                       | 10%Fo                     | -                              | P         | Rat, 1/500; Mou, 1/50 | o/n             | 4°C         | -                  | -           | -               | -             | -                 | AC       | Citrate BS                               | 121°C                                  | -     | 15m         |     |
|       |                                                     | 10%Fo                     | 24h                            | P         | 1/50                  | 40m             | 37°C        | -                  | -           | -               | -             | -                 | MW       | -                                        | 120°C                                  | -     | 14m         |     |
| 221   | Talin                                               | 4%PFA                     | -                              | -         | 1/250                 | 60m             | RT          | -                  | -           | -               | -             | -                 | ND       | -                                        | -                                      | -     | -           |     |
| 222   | Tamm-Horsfall Urinary Glycoprotein                  | 10%Fo                     | 7d                             | P         | 1/200                 | o/n             | 4°C         | -                  | -           | -               | -             | -                 | -        | -                                        | -                                      | -     | -           |     |
|       |                                                     | 10%Fo                     | -                              | P         | 1/200                 | 30m             | RT          | -                  | -           | -               | -             | -                 | PC       | Target Retrieval Solution ( pH9, Dako)   | 125°C                                  | -     | 0.5m        |     |
| 223   | Tartrate-resistant Acid Phosphatase                 | 10%Fo                     | -                              | P         | 1/50                  | o/n             | 4°C         | Proteinase K       | -           | -               | -             | -                 | -        | -                                        | -                                      | -     | -           |     |
|       |                                                     | 10%Fo ( Formic acid       | -                              | P         | 1/1000~               | o/n             | 4°C         | -                  | -           | -               | -             | -                 | -        | -                                        | -                                      | -     | -           |     |
|       |                                                     | 10%Fo                     | 1~3 d (1~8°C)                  | F         | 1/1000                | 60m             | RT          | -                  | -           | -               | -             | -                 | -        | ND                                       | -                                      | -     | -           |     |
| 224   | T-bet/TBX21                                         | 10%Fo                     | -                              | P         | 1/100                 | o/n             | 4°C         | -                  | -           | -               | -             | -                 | MW       | Target Retrieval Solution ( pH9, Dako)   | -                                      | -     | -           |     |
| 225   | TER-119/Erythroid Cells                             | 10%Fo                     | 3~7d                           | P         | 1/5000                | 60m             | RT          | -                  | -           | -               | -             | -                 | MW       | DW                                       | -                                      | -     | -           |     |
| 226   | TGFβ Receptor II                                    | 10%Fo                     | 3d                             | P         | 2 ug/mL               | 60m             | RT          | -                  | -           | -               | -             | -                 | PC       | Target Retrieval Solution ( pH9, Dako)   | 110°C                                  | -     | 10m         |     |
| 227   | TGFβ1                                               | 10%Fo                     | -                              | P         | 1/100                 | o/n             | 4°C         | -                  | -           | -               | -             | -                 | MW       | Citrate BS                               | -                                      | -     | 15m         |     |
| 228   | Thyroglobulin                                       | 10%Fo                     | 24h                            | P         | Ready to use          | 40m             | 37°C        | -                  | -           | -               | -             | -                 | -        | -                                        | -                                      | -     | -           |     |
| 229   | Thyroid Stimulating Hormone                         | 10%Fo                     | -                              | P         | 1/2000                | 30m             | RT          | -                  | -           | -               | -             | -                 | -        | ND                                       | -                                      | -     | -           |     |
|       |                                                     | 10%Fo                     | 7d                             | P         | 1/1000                | o/n             | 4°C         | Trypsin            | 37°C        | 30m             | -             | -                 | -        | -                                        | -                                      | -     | -           |     |
|       |                                                     | 10%Fo                     | -                              | P         | 1/4000                | o/n             | 4°C         | -                  | -           | -               | -             | -                 | -        | -                                        | -                                      | -     | -           |     |
|       |                                                     | 10%Fo                     | ~1y                            | P         | 1/1000                | 2h              | 37°C        | -                  | -           | -               | -             | -                 | -        | -                                        | -                                      | -     | -           | -   |
|       |                                                     | 10%Fo                     | -                              | P         | 1/5000                | o/n             | 4°C         | -                  | -           | -               | -             | -                 | -        | ND                                       | -                                      | -     | -           | -   |
| 230   | Thyroid Stimulating Hormone β                       | 10%Fo                     | -                              | P         | 1/100                 | o/n             | 4°C         | -                  | -           | -               | -             | -                 | MW       | HistoVT One                              | -                                      | -     | 15m         |     |
| 231   | Thyroid Transcription Factor 1                      | 10%Fo                     | o/n                            | P         | 1/100                 | 60m             | RT          | -                  | -           | -               | -             | -                 | MW       | Immunosaver (0.5%)                       | 100°C                                  | -     | 15m         |     |
|       |                                                     | -                         | -                              | P         | 1/20                  | 60m             | RT          | -                  | -           | -               | -             | -                 | MW       | Immunosaver (0.5%)                       | 98°C                                   | -     | 15m         |     |
|       |                                                     | 10%Fo                     | ∞                              | P         | 1/50                  | 60m             | RT          | -                  | -           | -               | -             | -                 | MW       | Citrate BS                               | -                                      | -     | 10m         |     |
|       |                                                     | 10%Fo                     | 24h                            | P         | 1/50~200              | 40m             | 37°C        | -                  | -           | -               | -             | -                 | -        | BO                                       | Target Retrieval Solution ( Dako)      | 100°C | -           | 20m |
|       |                                                     | 10%Fo                     | -                              | P         | 1/100                 | o/n             | 4°C         | -                  | -           | -               | -             | -                 | -        | AC                                       | Target Retrieval Solution ( pH6, Dako) | 121°C | -           | 20m |
| 10%Fo | 24h                                                 | P                         | 1/200                          | 60m       | RT                    | -               | -           | -                  | -           | -               | -             | MW                | EDTA     | 95°C                                     | -                                      | 20m   |             |     |

Supplementary Table 14-3 Immunological properties of primary antibodies and IHC staining conditions

| No. | Antibody                                            | Secondary antibody     |                                                                                      |             |                |             |                 | Chromogenic substrate |                  | Photo. No. |
|-----|-----------------------------------------------------|------------------------|--------------------------------------------------------------------------------------|-------------|----------------|-------------|-----------------|-----------------------|------------------|------------|
|     |                                                     | Kit product            | Product                                                                              | Supplier    | Catalog Number | Temperature | Incubation time | Reagent               | Incubation time  |            |
| 205 | Rat Mast Cell Protease 2                            | Histofine Simple Stain | Histofine® Simple Stain™ Rat MAX PO (M)                                              | Nichirei    | 414171         | RT          | 30m             | DAB                   | 10m              | Photo. 195 |
| 206 | Rat MFH                                             | Histofine Simple Stain | Histofine® Simple Stain™ Rat MAX PO (MULTI)                                          | Nichirei    | 414191         | RT          | 30m             | DAB                   | 30s              | Photo. 196 |
| 207 | Renin                                               | Envision               | EnVision+ System- HRP Labelled Polymer                                               | Dako        | K4000          | RT          | 30m             | DAB                   | 3m               |            |
| 208 | Retinal Pigment Epithelium-specific 65 kDa Protein  | Histofine Simple Stain | Histofine® Simple Stain™ Rat MAX PO (G)                                              | Nichirei    | 414331         | RT          | 30m             | DAB                   | 1~2m             | Photo. 197 |
| 209 | Retinoic Acid Receptor β                            | Histofine Simple Stain | Histofine® Simple Stain™ Rat MAX PO (R)                                              | Nichirei    | 414181         | RT          | 60m             | DAB                   | -                | Photo. 198 |
| 210 | Rhodopsin                                           | Histofine Simple Stain | Histofine® Simple Stain™ Rat MAX PO (MULTI)                                          | Nichirei    | 414191         | RT          | 30m             | DAB                   | 1~2m             | Photo. 199 |
| 211 | S100                                                | Envision               | EnVision+ System- HRP Labelled Polymer                                               | Dako        | K4000          | RT          | 30m             | DAB                   | 1m               | Photo. 200 |
|     |                                                     | Histofine Simple Stain | Histofine® Simple Stain™ Rat MAX PO (R)                                              | Nichirei    | 414181         | RT          | 30m             | DAB                   | 10m              |            |
|     |                                                     | Envision               | EnVision™+ Dual Link System-HRP                                                      | Dako        | K4061          | 37°C        | 30m             | DAB                   | 1~2m             |            |
|     |                                                     | Envision+              | Envision+ System-HRP Labelled Polymer Anti-Rabbit                                    | Dako        | K4003          | RT          | 30m             | DAB                   | 3m               |            |
|     |                                                     | Histofine Simple Stain | Histofine® Simple Stain™ Rat MAX-PO ( R )                                            | Nichirei    | 714181         | RT          | 30m             | DAB                   | 10m              | Photo. 201 |
|     |                                                     | Histofine Simple Stain | Histofine® Simple Stain™ Rat MAX PO (MULTI)                                          | Nichirei    | 414191         | RT          | 30m             | DAB                   | 30s              |            |
|     |                                                     | Envision               | EnVision+ System- HRP Labelled Polymer                                               | Dako        | K1390          | -           | 40m             | DAB                   | 30s              | Photo. 202 |
| 212 | S100a                                               | Histofine Simple Stain | Histofine® Simple Stain™ MAX-PO(MULTI)                                               | Nichirei    | 424151         | RT          | 30m             | DAB                   | 10m              |            |
|     |                                                     | LSAB                   | Polyclonal Rabbit Anti-Mouse Immunoglobulins, Biotinylated affinity-isolated F(ab')2 | Dako        | E0413          | RT          | 30m             | DAB                   | 5m               | Photo. 203 |
| 213 | Sall4                                               | Envision               | EnVision+ System- HRP Labelled Polymer                                               | Dako        | K4000          | RT          | 30m             | DAB                   | 3m               | Photo. 204 |
|     |                                                     | Histofine Simple Stain | Histofine® Simple Stain™ Rat MAX PO (MULTI)                                          | Nichirei    | 414191         | RT          | 30m             | DAB                   | 30s              | Photo. 205 |
| 214 | Sarcoplasmic/Endoplasmic Reticulum Calcium ATPase 2 | LSAB                   | Polyclonal Rabbit Anti-Mouse Immunoglobulins, Biotinylated affinity-isolated F(ab')2 | Dako        | E0413          | RT          | 30m             | DAB                   | 5m               |            |
|     |                                                     | Elite ABC              | Biotinylated Goat Anti-Rabbit IgG Antibody                                           | Vector Labs | BA-1000        | RT          | 30m             | DAB                   | 4~5m             | Photo. 206 |
| 215 | Schwann Cell/Peripheral Myelin                      | Envision               | EnVision+ System- HRP Labelled Polymer                                               | Dako        | K1390          | -           | 20m             | DAB                   | ~30s             |            |
|     |                                                     | Histofine Simple Stain | Histofine® Simple Stain™ Rat MAX-PO ( M )                                            | Nichirei    | 714171         | RT          | 30m             | DAB                   | 10m              | Photo. 207 |
| 216 | Slow Skeletal Myosin Heavy Chain                    | Envision               | EnVision™+ Dual Link System-HRP                                                      | KPL         | 074-1803       | RT          | 30m             | DAB                   | 30s              |            |
|     |                                                     | Histofine Simple Stain | Histofine® Simple Stain™ Rat MAX PO (MULTI)                                          | Nichirei    | 414191         | RT          | 30m             | DAB                   | 30s              | Photo. 208 |
| 217 | Somatostatin                                        | Histofine Simple Stain | Histofine® Simple Stain™ MAX-PO(R)                                                   | Nichirei    | 424141         | RT          | 30m             | DAB                   | 90s              |            |
|     |                                                     | Histofine Simple Stain | Histofine® Simple Stain™ Rat MAX PO (R)                                              | Nichirei    | 414181         | RT          | 30m             | DAB                   | 1m               |            |
| 218 | Steroidogenic Factor 1                              | Histofine Simple Stain | Histofine® Simple Stain™ Rat MAX PO (M)                                              | Nichirei    | 414171         | RT          | 30m             | DAB                   | 1~2m             | Photo. 209 |
| 219 | Stromal Cell-derived Factor 1/CXCL12                | Histofine Simple Stain | Histofine® Simple Stain™ Mouse MAX PO (R)                                            | Nichirei    | 414341         | RT          | 10m             | DAB                   | 5m               | Photo. 210 |
| 220 | Synaptophysin                                       | Envision               | EnVision+ System- HRP Labelled Polymer                                               | Dako        | K4000          | RT          | 30m             | DAB                   | -                | Photo. 211 |
|     |                                                     | Envision               | EnVision™+ Dual Link System-HRP                                                      | Dako        | K4061          | 37°C        | 30m             | DAB                   | 1~2m             |            |
| 221 | Talin                                               | Alexa Fluor            | -                                                                                    | -           | -              | -           | -               | -                     | -                |            |
| 222 | Tamm-Horsfall Urinary Glycoprotein                  | Envision               | EnVision+ System- HRP Labelled Polymer Anti-Rabbit                                   | Dako        | K4002          | RT          | 30m             | DAB                   | 2~5m             | Photo. 212 |
|     |                                                     | Histofine Simple Stain | Histofine® Simple Stain™ Rat MAX PO (R)                                              | Nichirei    | 414181         | RT          | 30m             | DAB                   | 4m               |            |
| 223 | Tartrate-resistant Acid Phosphatase                 | Histofine Simple Stain | Histofine® Simple Stain™ Rat MAX PO (MULTI)                                          | Nichirei    | 414191F        | -           | -               | -                     | -                |            |
|     |                                                     | Histofine Simple Stain | Histofine® Simple Stain™ Rat MAX PO (R)                                              | Nichirei    | 414181         | RT          | 60m             | DAB                   | ~10s             |            |
|     |                                                     | Histofine Simple Stain | Histofine® Simple Stain™ Rat MAX PO (MULTI)                                          | Nichirei    | 414191         | RT          | 30m             | DAB                   | 10m              | Photo. 213 |
| 224 | T-bet/TBX21                                         | Histofine Simple Stain | Histofine® Simple Stain™ Rat MAX PO (MULTI)                                          | Nichirei    | 414191F        | RT          | 30m             | DAB                   | 1m               |            |
| 225 | TER-119/Erythroid Cells                             | LSAB                   | Biotinylated Rabbit Anti-Rat Immunoglobulins                                         | Dako        | E0468          | RT          | 30m             | DAB                   | 5m               |            |
| 226 | TGFβ Receptor II                                    | Envision               | EnVision+ System- HRP Labelled Polymer Anti-Rabbit                                   | Dako        | K4002          | RT          | 30m             | DAB                   | 5m               |            |
| 227 | TGFβ1                                               | Envision               | EnVision+ System- HRP Labelled Polymer Anti-Rabbit                                   | Dako        | K4002          | RT          | 30m             | DAB                   | -                | Photo. 214 |
| 228 | Thyroglobulin                                       | Envision               | EnVision™+ Dual Link System-HRP                                                      | Dako        | K4061          | 37°C        | 30m             | DAB                   | 1~2m             |            |
| 229 | Thyroid Stimulating Hormone                         | -                      | -                                                                                    | -           | -              | -           | -               | -                     | -                |            |
|     |                                                     | Envision               | EnVision+ System- HRP Labelled Polymer Anti-Rabbit                                   | Dako        | K4002          | RT          | 30m             | DAB                   | 4m               | Photo. 215 |
|     |                                                     | Histofine Simple Stain | Histofine® Simple Stain™ Rat MAX PO (R)                                              | Nichirei    | 414181         | RT          | 60m             | DAB                   | -                |            |
|     |                                                     | Histofine Simple Stain | Histofine® Simple Stain™ Rat MAX PO (MULTI)                                          | Nichirei    | 414191         | 37°C        | -               | DAB                   | 30s~1m           | Photo. 216 |
| 230 | Thyroid Stimulating Hormone β                       | Envision               | EnVision™+ Dual Link System-HRP                                                      | Nichirei    | 414191         | RT          | 40m             | DAB                   | Under observatio |            |
|     |                                                     | Histofine Simple Stain | Histofine® Simple Stain™ Rat MAX PO (G)                                              | Nichirei    | 414331F        | -           | -               | -                     | -                |            |
| 231 | Thyroid Transcription Factor 1                      | Envision               | EnVision+ System- HRP Labelled Polymer                                               | Dako        | K4000          | RT          | 60m             | DAB                   | 15m              | Photo. 217 |
|     |                                                     | Histofine Simple Stain | Histofine® Simple Stain™ Rat MAX PO (MULTI)                                          | Nichirei    | 414191         | RT          | 30m             | DAB                   | 8m               |            |
|     |                                                     | Histofine Simple Stain | Histofine® Simple Stain™ Rat MAX PO (M)                                              | Nichirei    | 414171         | RT          | 30m             | DAB                   | -                | Photo. 218 |
|     |                                                     | Envision               | EnVision™+ Dual Link System-HRP                                                      | Dako        | K4061          | 37°C        | 30m             | DAB                   | 1~2m             |            |
|     |                                                     | Envision               | EnVision+ System- HRP Labelled Polymer Anti-Rabbit                                   | Dako        | K4002          | -           | 30m             | DAB                   | 4m               | Photo. 219 |
|     |                                                     | Histofine Simple Stain | Histofine® Simple Stain™ Rat MAX-PO ( R )                                            | Nichirei    | 714181         | RT          | 30m             | DAB                   | 10m              | Photo. 220 |

Supplementary Table 15-1 Immunological properties of primary antibodies and IHC staining conditions

| No. | Primary antibody                        |         |                           |                |          |             |                    |     |     |     |    |     |     |     |     |     |     |     |     |     |     |     |  | Positive Control    |                                                  |                                                   |                  |
|-----|-----------------------------------------|---------|---------------------------|----------------|----------|-------------|--------------------|-----|-----|-----|----|-----|-----|-----|-----|-----|-----|-----|-----|-----|-----|-----|--|---------------------|--------------------------------------------------|---------------------------------------------------|------------------|
|     | Antibody                                |         |                           |                |          |             | Species reactivity |     |     |     |    |     |     |     |     |     |     |     |     |     |     |     |  |                     |                                                  |                                                   |                  |
|     | Antigen                                 | Clone   | Supplier                  | Catalog Number | Antibody | Host animal | All                | Rat | Mou | Dog | GP | Ham | Hum | Mon | Rab | Cat | Pig | Cow | Hor | She | Fer | Chi |  |                     | Other                                            |                                                   |                  |
| 232 | Tissue Inhibitor of Metalloproteinase-3 | -       | Proteintech               | 10858-1-AP     | PoAb     | Rab         |                    | o   |     |     |    |     |     |     |     |     |     |     |     |     |     |     |  | Lung; Squamous cell |                                                  |                                                   |                  |
| 233 | TJP1/ZO-1                               | -       | Invitrogen                | 61-7300        | PoAb     | Rab         |                    | o   |     |     |    |     |     |     |     |     |     |     |     |     |     |     |  | All                 |                                                  |                                                   |                  |
| 234 | Trichohyalin                            | AE15    | Abcam                     | ab58755        | MoAb     | Mou         |                    |     |     |     |    |     |     |     | o   |     |     |     |     |     |     |     |  | Skin; Tongue        |                                                  |                                                   |                  |
| 235 | Troponin I, Cardiac                     | 2D5     | Affinity Bioreagents      | MA1-34958      | MoAb     | Mou         |                    |     |     |     |    |     |     | o   |     |     |     |     |     |     |     |     |  | Heart               |                                                  |                                                   |                  |
| 236 | Tubulin, $\beta$ III                    | TU-20   | Abcam                     | ab7751         | MoAb     | Mou         |                    | o   |     |     |    |     |     |     |     |     |     |     |     |     |     |     |  | Eye                 |                                                  |                                                   |                  |
| 237 | Tyrosine Hydroxylase                    | LNC1    | Millipore                 | MAB318         | MoAb     | Mou         |                    |     | o   |     |    |     |     |     |     |     |     |     |     |     |     |     |  | Brain               |                                                  |                                                   |                  |
|     |                                         | -       | Enzo Life Sciences        | BML-TZ1010     | PoAb     | Rab         |                    |     | o   |     |    |     |     |     |     |     |     |     |     |     |     |     |  | Midbrain            |                                                  |                                                   |                  |
| 238 | Tyrosine Tubulin                        | TUB-1A2 | Sigma-Aldrich             | T9028          | MoAb     | Mou         | o                  |     |     |     |    | o   |     |     |     |     |     |     |     |     |     |     |  | Testis              |                                                  |                                                   |                  |
| 239 | Ubiquitin                               | -       | Dako                      | Z0458          | PoAb     | Rab         |                    |     | o   |     |    |     |     |     |     |     |     |     |     |     |     |     |  |                     | Kidney; Bile duct; Small intestine; Testis; Lung |                                                   |                  |
| 240 | Uncoupling Protein 1                    | -       | Abcam                     | ab10983        | PoAb     | Rab         |                    | o   | o   |     |    |     |     |     |     |     |     |     |     |     |     |     |  |                     | Ubiquitinated protein                            |                                                   |                  |
| 241 | Uroplakin III                           | AU1     | Progen                    | 651108         | MoAb     | Mou         |                    | o   |     |     |    |     |     |     |     |     |     |     |     |     |     |     |  |                     | Brown adipocyte                                  |                                                   |                  |
| 242 | Vascular Endothelial Growth Factor A    | VG1     | Abnova                    | MAB6996        | MoAb     | Mou         |                    | o   |     |     |    |     |     |     |     |     |     |     |     |     |     |     |  |                     | -                                                |                                                   |                  |
| 243 | Vasoactive Intestinal Peptide           | -       | Millipore                 | AB982          | PoAb     | Rab         |                    | o   |     |     |    |     |     |     |     |     |     |     |     |     |     |     |  |                     | Kidney                                           |                                                   |                  |
| 244 | Vimentin                                | D21H3   | Cell Signaling Technology | 5741           | MoAb     | Rab         |                    | o   | o   |     |    |     |     |     |     |     |     |     |     |     |     |     |  |                     | Small intestine                                  |                                                   |                  |
|     |                                         |         |                           |                |          |             |                    | o   |     |     |    |     |     |     |     |     |     |     |     |     |     |     |  |                     | Mesenchyme                                       |                                                   |                  |
|     |                                         |         |                           |                |          |             |                    | o   |     |     |    |     |     |     |     |     |     |     |     |     |     |     |  |                     |                                                  | Kidney                                            |                  |
|     |                                         |         |                           |                |          |             |                    |     |     |     |    |     |     | o   | o   |     |     |     |     |     |     |     |  |                     |                                                  | Kidney                                            |                  |
|     |                                         |         |                           |                |          |             |                    | o   | x   |     |    |     |     |     |     |     |     |     |     |     |     |     |  |                     |                                                  | Fibrocyte; Smooth muscle cell; Myoepithelial cell |                  |
|     |                                         |         |                           |                |          |             |                    |     |     | o   |    |     |     |     |     |     |     |     |     |     |     |     |  |                     |                                                  | Kidney                                            |                  |
|     |                                         |         |                           |                |          |             |                    | o   |     |     | o  |     |     |     |     |     |     |     |     |     |     |     |  |                     |                                                  | Mesenchymal cell                                  |                  |
|     |                                         |         |                           |                |          |             |                    | o   |     |     |    |     |     |     |     |     |     |     |     |     |     |     |  |                     |                                                  |                                                   | Mesenchymal cell |
|     |                                         |         |                           |                |          |             |                    |     |     |     | o  |     |     |     |     |     |     |     | o   | o   |     |     |  |                     |                                                  |                                                   | Skin             |
|     |                                         |         |                           |                |          |             |                    |     |     |     | o  |     |     |     |     |     |     |     |     |     |     |     |  |                     |                                                  |                                                   | Mesenchyme       |
| 245 | Vinculin                                |         | Nichirei                  | 422101         | MoAb     | Mou         |                    |     |     |     |    |     | o   |     |     |     |     |     |     |     |     |     |  |                     | Mesenchyme                                       |                                                   |                  |
|     |                                         | Vim 3B4 | Dako                      | CBL202         | MoAb     | Mou         |                    | o   | o   |     |    |     |     |     |     |     |     |     |     |     |     |     |  |                     | Tumor                                            |                                                   |                  |
|     |                                         |         |                           | M7020          | MoAb     | Mou         |                    | o   |     |     |    |     |     |     |     |     |     |     |     |     |     |     |  |                     |                                                  | Uterus; Digestive canal                           |                  |
|     |                                         |         |                           | 172 002        | PoAb     | Rab         |                    | o   |     |     |    |     |     |     |     |     |     |     |     |     |     |     |  |                     |                                                  | Uterus                                            |                  |
|     |                                         |         | Synaptic Systems          |                | PoAb     | Rab         |                    | o   |     |     |    |     |     |     |     |     |     |     |     |     |     |     |  |                     |                                                  |                                                   | Mesenchyme       |
| 246 | Von Willebrand Factor                   | SPM227  | Abcam                     | ab18058        | MoAb     | Mou         |                    | o   | o   |     |    | o   | o   |     |     |     |     |     |     |     |     | o   |  |                     | All                                              |                                                   |                  |
|     |                                         | V284    | Millipore                 | 05-386         | MoAb     | Mou         |                    | o   | o   |     |    |     |     | o   | o   |     |     |     |     |     |     |     |  |                     |                                                  | CHL cell                                          |                  |
|     |                                         | -       | Abcam                     | ab73412        | PoAb     | Rab         |                    | o   | o   |     |    |     |     | o   |     |     |     |     |     |     |     |     |  |                     |                                                  | CHL cell                                          |                  |
| 247 | Wilms' Tumor 1                          | F8/86   | Dako                      | M0616          | MoAb     | Mou         |                    | o   |     | o   |    |     |     |     |     |     |     |     |     |     |     |     |  |                     | Endothelium                                      |                                                   |                  |
|     |                                         |         |                           |                |          |             |                    |     |     | o   |    |     |     |     |     |     |     |     |     |     |     |     |  |                     |                                                  | Vascular endothelium; Hemangioma                  |                  |
|     |                                         |         |                           |                |          |             |                    |     |     |     |    |     |     |     | o   |     |     |     |     |     |     |     |  |                     |                                                  | Lymph node                                        |                  |
|     |                                         |         |                           |                |          |             |                    |     |     |     |    |     |     |     |     |     |     |     | o   |     |     |     |  |                     |                                                  | Vascular endothelium                              |                  |
| 248 | X-ray Repair Cross-complementing 1      | -       | Thermo Fisher Scientific  | 18-0018        | PoAb     | Rab         |                    |     | o   | o   |    |     |     |     |     |     |     |     |     |     |     |     |  |                     | Blood vessel                                     |                                                   |                  |
|     |                                         | 6F-H2   | Dako                      | M3561          | MoAb     | Mou         |                    | o   |     | o   |    |     |     |     |     |     |     |     |     |     |     |     |  |                     |                                                  | Kidney; Testis                                    |                  |
|     |                                         |         |                           |                |          |             |                    | o   |     |     |    |     |     |     |     |     |     |     |     |     |     |     |  |                     |                                                  | Kidney                                            |                  |
| 248 | X-ray Repair Cross-complementing 1      |         |                           |                |          |             |                    | o   |     |     |    |     |     |     |     |     |     |     |     |     |     |     |  |                     |                                                  | Kidney                                            |                  |
|     |                                         |         |                           |                |          |             |                    | o   |     |     |    |     |     |     |     |     |     |     |     |     |     |     |  |                     |                                                  | Kidney                                            |                  |
|     |                                         |         |                           |                |          |             |                    | o   |     |     |    |     |     |     |     |     |     |     |     |     |     |     |  |                     |                                                  | Kidney                                            |                  |
| 248 | X-ray Repair Cross-complementing 1      | -       | Santa Cruz                | sc-11429       | PoAb     | Rab         |                    | o   |     |     |    |     |     |     |     |     |     |     |     |     |     |     |  |                     | Squamous cell ( Forestomach: Rat)                |                                                   |                  |

Supplementary Table 15-2 Immunological properties of primary antibodies and IHC staining conditions

| No.    | Antibody                                | Primary antibody        |                                |           |                      |                 |                 |                    |              |     |                     |          |                                        |       |            |
|--------|-----------------------------------------|-------------------------|--------------------------------|-----------|----------------------|-----------------|-----------------|--------------------|--------------|-----|---------------------|----------|----------------------------------------|-------|------------|
|        |                                         | Fixing solution         | Fixing time                    | Embedding | Dilution             | Incubation time | Temperature     | Antigen retrieval  |              |     |                     |          |                                        |       |            |
|        |                                         |                         |                                |           |                      |                 |                 | Protease treatment |              |     |                     | Heating  |                                        |       |            |
| Enzyme | Temperature                             | Incubation time         | Concentration                  | Method    | Solution             | Temperature     | Incubation time |                    |              |     |                     |          |                                        |       |            |
| 232    | Tissue Inhibitor of Metalloproteinase-3 | 10%Fo                   | 24h                            | P         | 1/200                | o/n             | 4°C             | -                  | -            | -   | -                   | -        | -                                      | -     | -          |
| 233    | TJP1/ZO-1                               | 10%Fo; MD               | -                              | P         | 1/50                 | o/n             | 4°C             | -                  | -            | -   | -                   | MW       | HistoVT One                            | -     | 15m        |
| 234    | Trichohyalin                            | 10%Fo                   | d                              | P         | 1/200                | 30m             | RT              | -                  | -            | -   | -                   | MV       | Target Retrieval Solution ( pH6, Dako) | -     | 20m        |
| 235    | Troponin I, Cardiac                     | 10%Fo                   | ∞                              | P         | 1/50                 | o/n             | 4°C             | -                  | -            | -   | -                   | BO       | Citrate BS                             | 95°C  | 40m        |
| 236    | Tubulin, β III                          | 10%Fo; Eye:MD→10%Fo     | 1w                             | P         | 1/200                | 60m             | RT              | -                  | -            | -   | -                   | MW       | Citrate BS                             | 98°C  | 15m        |
| 237    | Tyrosine Hydroxylase                    | 10%Fo                   | -                              | P         | 1/2000               | o/n             | 4°C             | -                  | -            | -   | -                   | Bo       | Citrate BS                             | -     | 10m        |
|        |                                         | 10%Fo                   | o/n                            | P         | 1/1000               | o/n             | 4°C             | -                  | -            | -   | -                   | ND       | -                                      | -     | -          |
| 238    | Tyrosine Tubulin                        | 10%Fo                   | -                              | P         | 1/800                | o/n             | 4°C             | -                  | -            | -   | -                   | ND or MW | -                                      | -     | -          |
|        |                                         | 10%Fo; testis:FSA→10%Fo | 1m                             | P         | 1/1000               | 60m             | RT              | -                  | -            | -   | -                   | -        | -                                      | -     | -          |
| 239    | Ubiquitin                               | 4%ZnFo                  | 2d                             | P         | 1/1000               | o/n             | 4°C             | Protease XXV       | 37°C         | 10m | 1 mg/mL             | -        | -                                      | -     | -          |
| 240    | Uncoupling Protein 1                    | 10%Fo                   | ∞                              | P         | 1/500                | 60m             | RT              | -                  | -            | -   | -                   | -        | -                                      | -     | -          |
| 241    | Uroplakin III                           | 10%Fo                   | o/n                            | P         | Ready to use         | 60m             | RT              | -                  | -            | -   | -                   | AC       | Citrate BS (pH6)                       | 121°C | 15m        |
|        |                                         | 10%Fo                   | 7d                             | P         | Ready to use         | o/n             | 4°C             | -                  | -            | -   | -                   | AC       | Target Retrieval Solution ( pH6, Dako) | 105°C | 15m        |
| 242    | Vascular Endothelial Growth Factor A    | 10%Fo                   | -                              | P         | 1/800                | o/n             | 4°C             | -                  | -            | -   | -                   | PC       | Target Retrieval Solution ( pH6, Dako) | 125°C | 0.5m       |
| 243    | Vasoactive Intestinal Peptide           | 10%Fo                   | 3~7d                           | P         | 1/500~1000           | o/n             | 4°C             | Proteinase K       | RT           | 5m  | Ready to use        | -        | -                                      | -     | -          |
| 244    | Vimentin                                | 10%Fo                   | w                              | P         | 1/500                | o/n             | 4°C             | -                  | -            | -   | -                   | PC       | Citrate BS                             | -     | 5m         |
|        |                                         | 10%Fo                   | 3~5d                           | P         | Ready to use         | 60m             | RT              | -                  | -            | -   | -                   | PC       | Serotec Target Unmasking Fluid Mark2   | -     | 10m        |
|        |                                         | 10%Fo                   | 3~5d                           | P         | Ready to use         | 60m             | RT              | -                  | -            | -   | -                   | PC       | Citrate BS                             | -     | 10m        |
|        |                                         | 10%Fo; Frozen           | 48h                            | P; F      | 1/300                | P, o/n; F, 15m  | 4°C; RT         | -                  | -            | -   | -                   | AC       | Citrate BS                             | 121°C | 3m         |
|        |                                         | 10%Fo                   | o/n                            | P         | Ready to use (1/1~2) | 30m             | RT              | -                  | -            | -   | -                   | PC       | Instant antigen retrieval H buffer     | 125°C | 30s        |
|        |                                         | 10%Fo                   | 24h                            | P         | Ready to use         | 40m             | 37°C            | -                  | -            | -   | -                   | MW       | Citrate BS                             | 120°C | 14m        |
|        |                                         | 10%Fo                   | w                              | P         | Ready to use         | 30m             | RT              | -                  | -            | -   | -                   | MV       | Target Retrieval Solution ( pH9, Dako) | -     | 5m (After) |
|        |                                         | 10%Fo                   | A few days (clinical specimen) | P         | Ready to use         | o/n             | 4°C             | -                  | -            | -   | -                   | AC       | Target Retrieval Solution ( Dako)      | 121°C | 20m        |
|        |                                         | 10%Fo                   | 24h                            | P; F      | Ready to use         | 60m             | RT              | -                  | -            | -   | -                   | MW       | Citrate BS                             | 95°C  | 20m        |
|        |                                         | 10%Fo                   | ∞                              | P         | Ready to use         | 60m             | RT              | Proteinase         | 37°C         | 2m  | Ready to use        | -        | -                                      | -     | -          |
|        |                                         | 10%Fo                   | 1w                             | P         | Ready to use         | 60m             | RT              | -                  | -            | -   | -                   | MW       | Citrate BS                             | 500W  | 10m        |
|        |                                         | 10%Fo                   | o/n                            | P         | Ready to use         | 60m             | RT              | -                  | -            | -   | -                   | PC       | Citrate BS                             | -     | 10m        |
| 10%Fo  | -                                       | P                       | 1/200                          | o/n       | 4°C                  | -               | -               | -                  | -            | MW  | Citrate BS          | -        | 15m                                    |       |            |
| 10%Fo  | ∞                                       | P                       | 1/200                          | 60m       | RT                   | Proteinase      | 37°C            | 2m                 | Ready to use | -   | -                   | -        | -                                      |       |            |
| 245    | Vinculin                                | 10%Fo                   | -                              | P         | 1/25                 | o/n             | 4°C             | -                  | -            | -   | -                   | MW       | HistoVT One                            | -     | 15m        |
|        |                                         | 4%PFA                   | -                              | -         | 1/100                | 60m             | RT              | -                  | -            | -   | -                   | ND       | -                                      | -     |            |
|        |                                         | 4%PFA                   | -                              | -         | 1/200                | 60m             | RT              | -                  | -            | -   | -                   | ND       | -                                      | -     |            |
| 246    | Von Willebrand Factor                   | 10%Fo                   | ∞                              | P         | 1/200                | 75m             | RT              | -                  | -            | -   | -                   | Bo       | PT link (pH9)                          | 95°C  | 20m        |
|        |                                         | 10%Fo                   | 24h                            | P         | 1/25~50              | 30m             | RT              | -                  | -            | -   | -                   | BO       | Target Retrieval Solution ( Dako)      | 100°C | 20m        |
|        |                                         | 10%Fo                   | -                              | P         | 1/400                | o/n             | 4°C             | -                  | -            | -   | -                   | PC       | Target Retrieval Solution ( pH6, Dako) | 125°C | 0.5m       |
|        |                                         | 10%Fo                   | ∞                              | P         | 1/800                | o/n             | 4°C             | Proteinase K       | RT           | 5m  | 2 drops PK/TBS 1 mL | -        | -                                      | -     |            |
|        |                                         | 10%Fo                   | 1w~                            | P         | 1/100                | 30m             | RT              | -                  | -            | -   | -                   | MW       | Citrate BS                             | -     | 10m        |
| 247    | Wilms' Tumor 1                          | 10%Fo; 4%PFA            | ∞; 24h                         | P         | 1/200                | 30m             | RT              | Pepsin             | 37°C         | 20m | 0.40%               | -        | -                                      | -     |            |
|        |                                         | 10%Fo                   | 3d                             | P         | 1/500                | o/n             | 4°C             | -                  | -            | -   | -                   | AC       | Citrate BS                             | 121°C | 15m        |
|        |                                         | 10%Fo                   | o/n                            | P         | 1/5000               | o/n             | 4°C             | -                  | -            | -   | -                   | AC       | Target Retrieval Solution ( pH6, Dako) | 121°C | 15m        |
|        |                                         | 10%Fo                   | ~1y                            | P         | 1/4000               | o/n             | 3~8°C           | -                  | -            | -   | -                   | AC       | Citrate BS                             | 121°C | 5m         |
| 248    | X-ray Repair Cross-complementing 1      | 10%Fo                   | 24h                            | P         | 1/600                | o/n             | 4°C             | -                  | -            | -   | -                   | Bo       | Citrate BS                             | 98°C  | 10m        |

Supplementary Table 15-3 Immunological properties of primary antibodies and IHC staining conditions

| No. | Antibody                                | Secondary antibody          |                                                                                     |                   |                |             |                 | Chromogenic substrate |                 | Photo. No. |  |
|-----|-----------------------------------------|-----------------------------|-------------------------------------------------------------------------------------|-------------------|----------------|-------------|-----------------|-----------------------|-----------------|------------|--|
|     |                                         | Kit product                 | Product                                                                             | Supplier          | Catalog Number | Temperature | Incubation time | Reagent               | Incubation time |            |  |
| 232 | Tissue Inhibitor of Metalloproteinase-3 | Histofine Simple Stain      | Histofine® Simple Stain™ Rat MAX PO (R)                                             | Nichirei          | 414181         | RT          | 60m             | DAB                   | -               | Photo. 221 |  |
| 233 | TJP1/ZO-1                               | Histofine Simple Stain      | Histofine® Simple Stain™ Rat MAX PO (MULTI)                                         | Nichirei          | 414191F        | -           | -               | -                     | -               |            |  |
| 234 | Trichohyalin                            | Histofine Simple Stain      | Histofine® Simple Stain™ Rat MAX PO (MULTI)                                         | Nichirei          | 414191         | RT          | 30m             | DAB                   | 10m             | Photo. 222 |  |
| 235 | Troponin I, Cardiac                     | Envision                    | EnVision™+ Dual Link System-HRP                                                     | Dako              | K4063          | RT          | 60m             | DAB                   | 2m              | Photo. 223 |  |
| 236 | Tubulin, β III                          | Histofine Simple Stain      | Histofine® Simple Stain™ Rat MAX PO (MULTI)                                         | Nichirei          | 414191         | RT          | 30m             | DAB                   | 5m              |            |  |
| 237 | Tyrosine Hydroxylase                    | Histofine Simple Stain      | Histofine® MOUSESTAIN KIT*                                                          | Nichirei          | 414321         | RT          | 10m             | DAB                   | 10m             |            |  |
|     |                                         | Elite ABC                   | VECTASTAIN Elite ABC Kit (Rabbit IgG)                                               | Vector Labs       | PK-6101        | RT          | 30m             | DAB                   | 1m30s           | Photo. 224 |  |
| 238 | Tyrosine Tubulin                        | Histofine Simple Stain      | Histofine® Simple Stain™ Rat MAX PO (MULTI)                                         | Nichirei          | 414191F        | RT          | 30m             | DAB                   | 1m              |            |  |
|     |                                         | Histofine Simple Stain      | Histofine® Simple Stain™ Rat MAX PO (MULTI)                                         | Nichirei          | 414191         | RT          | 30m             | DAB                   | 30s             | Photo. 225 |  |
| 239 | Ubiquitin                               | Envision                    | EnVision™+ Dual Link System-HRP                                                     | Dako              | K6043          | RT          | 30m             | DAB                   | 1m30s           | Photo. 226 |  |
| 240 | Uncoupling Protein 1                    | Histofine Simple Stain      | Histofine® Simple Stain™ Rat MAX PO (R)                                             | Nichirei          | 414181         | RT          | 30m             | DAB                   | -               | Photo. 227 |  |
| 241 | Uroplakin III                           | -                           | -                                                                                   | -                 | -              | -           | -               | DAB                   | -               |            |  |
|     |                                         | Envision                    | EnVision+ System- HRP Labelled Polymer                                              | Dako              | K4000          | RT          | 30m             | DAB                   | 2~5m            | Photo. 228 |  |
| 242 | Vascular Endothelial Growth Factor A    | Histofine Simple Stain      | Histofine® Simple Stain™ Rat MAX PO (M)                                             | Nichirei          | 414171         | RT          | 30m             | DAB                   | 4m              |            |  |
| 243 | Vasoactive Intestinal Peptide           | LSAB                        | Polyclonal Swine Anti-Rabbit Immunoglobulins/Biotinylated Swine F(ab') <sub>2</sub> | Dako              | E0431          | RT          | 30m             | DAB                   | 5m              |            |  |
| 244 | Vimentin                                | Envision                    | EnVision™+ Dual Link System-HRP                                                     | Dako              | K4063          | RT          | 30m             | DAB                   | 3m              |            |  |
|     |                                         | Histofine Simple Stain      | Histofine® Simple Stain™ Rat MAX PO (MULTI)                                         | Nichirei          | 414191         | RT          | 30m             | DAB                   | 2m              |            |  |
|     |                                         | Histofine Simple Stain      | Histofine® Simple Stain™ Rat MAX PO (MULTI)                                         | Nichirei          | 414191         | RT          | 30m             | DAB                   | 2m              |            |  |
|     |                                         | Envision                    | EnVision+ System- HRP Labelled Polymer                                              | Dako              | K4000          | RT          | 30m             | DAB                   | 1m              | Photo. 229 |  |
|     |                                         | -                           | -                                                                                   | -                 | -              | -           | -               | -                     | DAB             | -          |  |
|     |                                         | Envision                    | EnVision™+ Dual Link System-HRP                                                     | Dako              | K4061          | 37°C        | 30m             | DAB                   | 1~2m            |            |  |
|     |                                         | Histofine Simple Stain      | Histofine® Simple Stain™ Rat MAX PO (MULTI)                                         | Nichirei          | 414191         | RT          | 30m             | DAB                   | 10m             |            |  |
|     |                                         | Envision+                   | Envision+ System-HRP Labelled Polymer Anti-mouse                                    | Dako              | K4001          | RT          | 30m             | DAB                   | 3m              |            |  |
|     |                                         | Histofine Simple Stain      | Histofine® Simple Stain™ Rat MAX-PO ( M )                                           | Nichirei          | 714171         | RT          | 30m             | DAB                   | 10m             |            |  |
|     |                                         | Histofine Simple Stain      | Histofine® Simple Stain™ Mouse MAX PO (R)                                           | Nichirei          | 414341         | RT          | 30m             | DAB                   | 30s             |            |  |
|     |                                         | Envision                    | EnVision+ System- HRP Labelled Polymer Anti-Rabbit                                  | Dako              | K4002          | RT          | 30m             | DAB                   | 5m              |            |  |
| 245 | Vinculin                                | Elite ABC                   | VECTASTAIN Elite ABC Kit (Mouse IgG)                                                | Vector Labs       | PK-6102        | RT          | 30m             | DAB                   | -               | Photo. 230 |  |
|     |                                         | SAB                         | Histofine® SimpleStain SAB-PO(MULTI)                                                | Nichirei          | 424043         | -           | -               | -                     | -               |            |  |
|     |                                         | Histofine Simple Stain      | Histofine® Simple Stain™ Rat MAX PO (MULTI)                                         | Nichirei          | 414191         | RT          | 30m             | DAB                   | 30s             |            |  |
|     |                                         | Histofine Simple Stain      | Histofine® Simple Stain™ Rat MAX PO (MULTI)                                         | Nichirei          | 414191F        | -           | -               | -                     | -               |            |  |
|     |                                         | Alexa Fluor                 | -                                                                                   | Life Technologies | -              | -           | -               | -                     | -               |            |  |
| 246 | Von Willebrand Factor                   | Alexa Fluor                 | -                                                                                   | Life Technologies | -              | -           | -               | -                     | -               |            |  |
|     |                                         | Envision                    | EnVision+ System- HRP Labelled Polymer                                              | Dako              | K1390          | -           | 40m             | DAB                   | 2m              |            |  |
|     |                                         | Envision                    | EnVision™+ Dual Link System-HRP                                                     | Dako              | K4061          | 37°C        | 30m             | DAB                   | 1~2m            |            |  |
| 247 | Wilms' Tumor 1                          | Histofine Simple Stain      | Histofine® Simple Stain™ MAX-PO(M)                                                  | Nichirei          | 424131         | RT          | 30m             | DAB                   | 90s             |            |  |
|     |                                         | Envision                    | EnVision™+ Dual Link System-HRP                                                     | Dako              | K4063          | RT          | 60m             | DAB                   | 2m              | Photo. 231 |  |
|     |                                         | Histofine Simple Stain      | Histofine® Simple Stain™ MAX-PO(MULTI)                                              | Nichirei          | 424151         | RT          | 30m             | DAB                   | 10m             | Photo. 232 |  |
|     |                                         | Histofine Simple Stain      | Histofine® Simple Stain™ Rat MAX PO (M)                                             | Nichirei          | 414171         | RT          | 30m             | DAB                   | -               | Photo. 233 |  |
| 248 | X-ray Repair Cross-complementing 1      | Envision + System-HRP       | EnVision+ System- HRP Labelled Polymer Anti-Rabbit                                  | Dako              | K4002          | RT          | 30m             | DAB                   | 1~2m            |            |  |
|     |                                         | Envision                    | EnVision+ System- HRP Labelled Polymer Anti-Rabbit                                  | Dako              | K4002          | RT          | 30m             | DAB                   | 2~5m            | Photo. 234 |  |
|     |                                         | Histofine Simple Stain      | Histofine® Simple Stain™ Rat MAX PO (MULTI)                                         | Nichirei          | 414191         | RT          | 30m             | DAB                   | 1~2m            |            |  |
| 248 | X-ray Repair Cross-complementing 1      | Biotinylated immunoglobulin | Biotinylated Goat Anti-Rabbit IgG Antibody                                          | Vector Labs       | BA-1000        | RT          | 30m             | DAB                   | -               | Photo. 235 |  |

|                          |                                                                                                                                                                                                                                                         |
|--------------------------|---------------------------------------------------------------------------------------------------------------------------------------------------------------------------------------------------------------------------------------------------------|
| Clonality                | MoAb, Monoclonal ; PoAb, Polyclonal                                                                                                                                                                                                                     |
| Animal species           | All, All species; Rat, Rat; Mou, Mouse; Dog, Dog; GP, Guinea pig; Ham, Hamster; Hum, Human; Mon, Monkey; Rab, Rabbit; Cat, Cat; Pig, Pig; Cow, Cow; Hor, Horse; She, Sheep; Fer, Ferret; Chi, Chicken; Other, Other.                                    |
| Reactivity               | O, good; $\Delta$ , conditional; x, inappropriate                                                                                                                                                                                                       |
| Fixation                 | Fo, Buffered formalin; PFA, Paraformaldehyde; GA, Glutaraldehyde; ZnFo, Zinc formalin; PLP, Periodate lysine paraformaldehyde; FSA, Formalin sucrose acetic acid; MD, (Modified) Davidson; EM, Electro microscopy; FG, Buffered formalin+Glutaraldehyde |
| Embedding                | F, Frozen; P, Paraffin; Amex-P, Acetone-methyl benzoate-xylene-paraffin                                                                                                                                                                                 |
| Time                     | s, second; m, minute; h, hour; o/n, over night; d, day; w, week; m, month; y, year.                                                                                                                                                                     |
| Temperature              | RT, Room temperature.                                                                                                                                                                                                                                   |
| Retrieval heating method | MW, Microwave; AC, Autoclave; PC, Pressure cooker; Bo, Boiling; He, Heating; ND, Not done.                                                                                                                                                              |
| Solution                 | DW, Distilled water; BS, Buffer solution.                                                                                                                                                                                                               |
| Coloring Reagent         | NF, New Fuchsin; DAB, Diaminobenzidine; FITC, Fluorescein isothiocyanate                                                                                                                                                                                |
